# Supplementary material
Source: MDPI journal article supplement (https://www.mdpi.com/2073-4395/10/4/463)
Supplement: s1 [file s1]

## Sheet: Biomass
Table S1. Data collected on cover crop biomass production on various measurement dates in season-1 (2016-2017) and season-2 (2018). DAP- Days after planting
Season	Treatments	Date	DAP	Replication	Dry biomass (g/m2)
1	Mixture of five (Austrian winter peas, rye, Oat, crimson clover, and hairy vetch )	2017-01-30	83	1	62
1	Mixture of five (Austrian winter peas, rye, Oat, crimson clover, and hairy vetch )	2017-01-30	83	2	69.6
1	Mixture of five (Austrian winter peas, rye, Oat, crimson clover, and hairy vetch )	2017-01-30	83	3	54
1	Mixture of five (Austrian winter peas, rye, Oat, crimson clover, and hairy vetch )	2017-01-30	83	4	36.2
1	Mixture of five (Austrian winter peas, rye, Oat, crimson clover, and hairy vetch )	2017-01-30	83	5	59
1	Mixture of five (oats, wheat, crimson clover, radish, and turnip)	2017-01-30	83	1	37.6
1	Mixture of five (oats, wheat, crimson clover, radish, and turnip)	2017-01-30	83	2	34.88
1	Mixture of five (oats, wheat, crimson clover, radish, and turnip)	2017-01-30	83	3	29.6
1	Mixture of five (oats, wheat, crimson clover, radish, and turnip)	2017-01-30	83	4	42.04
1	Mixture of five (oats, wheat, crimson clover, radish, and turnip)	2017-01-30	83	5	34
1	Mixture of two (crimson clover and rye)	2017-01-30	83	1	53.8
1	Mixture of two (crimson clover and rye)	2017-01-30	83	2	39.7
1	Mixture of two (crimson clover and rye)	2017-01-30	83	3	41.4
1	Mixture of two (crimson clover and rye)	2017-01-30	83	4	31.9
1	Mixture of two (crimson clover and rye)	2017-01-30	83	5	55.4
1	Mixture of two (crimson clover and turnip)	2017-01-30	83	1	22.8
1	Mixture of two (crimson clover and turnip)	2017-01-30	83	2	30.42
1	Mixture of two (crimson clover and turnip)	2017-01-30	83	3	15.6
1	Mixture of two (crimson clover and turnip)	2017-01-30	83	4	33.6
1	Mixture of two (crimson clover and turnip)	2017-01-30	83	5	11.6
1	Mixture of two (oat and radish)	2017-01-30	83	1	27.4
1	Mixture of two (oat and radish)	2017-01-30	83	2	6.14
1	Mixture of two (oat and radish)	2017-01-30	83	3	25
1	Mixture of two (oat and radish)	2017-01-30	83	4	32.62
1	Mixture of two (oat and radish)	2017-01-30	83	5	33.4
1	Single species (crimson clover)	2017-01-30	83	1	8.4
1	Single species (crimson clover)	2017-01-30	83	2	16.8
1	Single species (crimson clover)	2017-01-30	83	3	8.6
1	Single species (crimson clover)	2017-01-30	83	4	8.8
1	Single species (crimson clover)	2017-01-30	83	5	6.2
1	Single species (rye)	2017-01-30	83	1	29.8
1	Single species (rye)	2017-01-30	83	2	32.2
1	Single species (rye)	2017-01-30	83	3	42.4
1	Single species (rye)	2017-01-30	83	4	66.2
1	Single species (rye)	2017-01-30	83	5	45.2
1	Mixture of five (Austrian winter peas, rye, Oat, crimson clover, and hairy vetch )	2017-02-27	111	1	104.8
1	Mixture of five (Austrian winter peas, rye, Oat, crimson clover, and hairy vetch )	2017-02-27	111	2	146.8
1	Mixture of five (Austrian winter peas, rye, Oat, crimson clover, and hairy vetch )	2017-02-27	111	3	203
1	Mixture of five (Austrian winter peas, rye, Oat, crimson clover, and hairy vetch )	2017-02-27	111	4	202.2
1	Mixture of five (Austrian winter peas, rye, Oat, crimson clover, and hairy vetch )	2017-02-27	111	5	180.6
1	Mixture of five (oats, wheat, crimson clover, radish, and turnip)	2017-02-27	111	1	65.2
1	Mixture of five (oats, wheat, crimson clover, radish, and turnip)	2017-02-27	111	2	101
1	Mixture of five (oats, wheat, crimson clover, radish, and turnip)	2017-02-27	111	3	108.6
1	Mixture of five (oats, wheat, crimson clover, radish, and turnip)	2017-02-27	111	4	.
1	Mixture of five (oats, wheat, crimson clover, radish, and turnip)	2017-02-27	111	5	146.8
1	Mixture of two (crimson clover and rye)	2017-02-27	111	1	71.8
1	Mixture of two (crimson clover and rye)	2017-02-27	111	2	108.6
1	Mixture of two (crimson clover and rye)	2017-02-27	111	3	68.4
1	Mixture of two (crimson clover and rye)	2017-02-27	111	4	136
1	Mixture of two (crimson clover and rye)	2017-02-27	111	5	185.6
1	Mixture of two (crimson clover and turnip)	2017-02-27	111	1	96.6
1	Mixture of two (crimson clover and turnip)	2017-02-27	111	2	47.4
1	Mixture of two (crimson clover and turnip)	2017-02-27	111	3	78.2
1	Mixture of two (crimson clover and turnip)	2017-02-27	111	4	.
1	Mixture of two (crimson clover and turnip)	2017-02-27	111	5	99.8
1	Mixture of two (oat and radish)	2017-02-27	111	1	98.4
1	Mixture of two (oat and radish)	2017-02-27	111	2	87
1	Mixture of two (oat and radish)	2017-02-27	111	3	157.8
1	Mixture of two (oat and radish)	2017-02-27	111	4	119.2
1	Mixture of two (oat and radish)	2017-02-27	111	5	142.4
1	Single species (crimson clover)	2017-02-27	111	1	12.2
1	Single species (crimson clover)	2017-02-27	111	2	15.2
1	Single species (crimson clover)	2017-02-27	111	3	45.6
1	Single species (crimson clover)	2017-02-27	111	4	41.6
1	Single species (crimson clover)	2017-02-27	111	5	28.6
1	Single species (rye)	2017-02-27	111	1	55.4
1	Single species (rye)	2017-02-27	111	2	130.4
1	Single species (rye)	2017-02-27	111	3	140.2
1	Single species (rye)	2017-02-27	111	4	148.4
1	Single species (rye)	2017-02-27	111	5	200.4
1	Mixture of five (Austrian winter peas, rye, Oat, crimson clover, and hairy vetch )	2017-03-25	137	1	491.6
1	Mixture of five (Austrian winter peas, rye, Oat, crimson clover, and hairy vetch )	2017-03-25	137	2	575.4
1	Mixture of five (Austrian winter peas, rye, Oat, crimson clover, and hairy vetch )	2017-03-25	137	3	727.4
1	Mixture of five (Austrian winter peas, rye, Oat, crimson clover, and hairy vetch )	2017-03-25	137	4	610.6
1	Mixture of five (Austrian winter peas, rye, Oat, crimson clover, and hairy vetch )	2017-03-25	137	5	554.8
1	Mixture of five (oats, wheat, crimson clover, radish, and turnip)	2017-03-25	137	1	385.2
1	Mixture of five (oats, wheat, crimson clover, radish, and turnip)	2017-03-25	137	2	273.4
1	Mixture of five (oats, wheat, crimson clover, radish, and turnip)	2017-03-25	137	3	452.6
1	Mixture of five (oats, wheat, crimson clover, radish, and turnip)	2017-03-25	137	4	370.8
1	Mixture of five (oats, wheat, crimson clover, radish, and turnip)	2017-03-25	137	5	471.4
1	Mixture of two (crimson clover and rye)	2017-03-25	137	1	310.2
1	Mixture of two (crimson clover and rye)	2017-03-25	137	2	405
1	Mixture of two (crimson clover and rye)	2017-03-25	137	3	612.6
1	Mixture of two (crimson clover and rye)	2017-03-25	137	4	496.4
1	Mixture of two (crimson clover and rye)	2017-03-25	137	5	653.8
1	Mixture of two (crimson clover and turnip)	2017-03-25	137	1	144.6
1	Mixture of two (crimson clover and turnip)	2017-03-25	137	2	236
1	Mixture of two (crimson clover and turnip)	2017-03-25	137	3	403.2
1	Mixture of two (crimson clover and turnip)	2017-03-25	137	4	365.6
1	Mixture of two (crimson clover and turnip)	2017-03-25	137	5	240.4
1	Mixture of two (oat and radish)	2017-03-25	137	1	466.8
1	Mixture of two (oat and radish)	2017-03-25	137	2	350.8
1	Mixture of two (oat and radish)	2017-03-25	137	3	436.2
1	Mixture of two (oat and radish)	2017-03-25	137	4	262
1	Mixture of two (oat and radish)	2017-03-25	137	5	480.6
1	Single species (crimson clover)	2017-03-25	137	1	72.6
1	Single species (crimson clover)	2017-03-25	137	2	147
1	Single species (crimson clover)	2017-03-25	137	3	201.8
1	Single species (crimson clover)	2017-03-25	137	4	116
1	Single species (crimson clover)	2017-03-25	137	5	185
1	Single species (rye)	2017-03-25	137	1	548.4
1	Single species (rye)	2017-03-25	137	2	430.6
1	Single species (rye)	2017-03-25	137	3	396.8
1	Single species (rye)	2017-03-25	137	4	678.4
1	Single species (rye)	2017-03-25	137	5	618.6
1	Mixture of five (Austrian winter peas, rye, Oat, crimson clover, and hairy vetch )	2017-04-19	162	1	810.8
1	Mixture of five (Austrian winter peas, rye, Oat, crimson clover, and hairy vetch )	2017-04-19	162	2	561.6
1	Mixture of five (Austrian winter peas, rye, Oat, crimson clover, and hairy vetch )	2017-04-19	162	3	673.2
1	Mixture of five (Austrian winter peas, rye, Oat, crimson clover, and hairy vetch )	2017-04-19	162	4	519.8
1	Mixture of five (Austrian winter peas, rye, Oat, crimson clover, and hairy vetch )	2017-04-19	162	5	548.4
1	Mixture of five (oats, wheat, crimson clover, radish, and turnip)	2017-04-19	162	1	384.8
1	Mixture of five (oats, wheat, crimson clover, radish, and turnip)	2017-04-19	162	2	599.4
1	Mixture of five (oats, wheat, crimson clover, radish, and turnip)	2017-04-19	162	3	298.4
1	Mixture of five (oats, wheat, crimson clover, radish, and turnip)	2017-04-19	162	4	368.6
1	Mixture of five (oats, wheat, crimson clover, radish, and turnip)	2017-04-19	162	5	384
1	Mixture of two (crimson clover and rye)	2017-04-19	162	1	496.2
1	Mixture of two (crimson clover and rye)	2017-04-19	162	2	632.8
1	Mixture of two (crimson clover and rye)	2017-04-19	162	3	583
1	Mixture of two (crimson clover and rye)	2017-04-19	162	4	377
1	Mixture of two (crimson clover and rye)	2017-04-19	162	5	593.6
1	Mixture of two (crimson clover and turnip)	2017-04-19	162	1	98
1	Mixture of two (crimson clover and turnip)	2017-04-19	162	2	69.2
1	Mixture of two (crimson clover and turnip)	2017-04-19	162	3	56.4
1	Mixture of two (crimson clover and turnip)	2017-04-19	162	4	298.6
1	Mixture of two (crimson clover and turnip)	2017-04-19	162	5	150
1	Mixture of two (oat and radish)	2017-04-19	162	1	558.4
1	Mixture of two (oat and radish)	2017-04-19	162	2	454.6
1	Mixture of two (oat and radish)	2017-04-19	162	3	418.2
1	Mixture of two (oat and radish)	2017-04-19	162	4	248.2
1	Mixture of two (oat and radish)	2017-04-19	162	5	379.2
1	Single species (crimson clover)	2017-04-19	162	1	64.6
1	Single species (crimson clover)	2017-04-19	162	2	196
1	Single species (crimson clover)	2017-04-19	162	3	300.8
1	Single species (crimson clover)	2017-04-19	162	4	233.4
1	Single species (crimson clover)	2017-04-19	162	5	340.8
1	Single species (rye)	2017-04-19	162	1	383.2
1	Single species (rye)	2017-04-19	162	2	581.4
1	Single species (rye)	2017-04-19	162	3	636.4
1	Single species (rye)	2017-04-19	162	4	473.4
1	Single species (rye)	2017-04-19	162	5	591.4
2	Mixture of five (Austrian winter peas, rye, Oat, crimson clover, and hairy vetch )	2018-03-29	62	1	96
2	Mixture of five (Austrian winter peas, rye, Oat, crimson clover, and hairy vetch )	2018-03-29	62	2	121.8
2	Mixture of five (Austrian winter peas, rye, Oat, crimson clover, and hairy vetch )	2018-03-29	62	3	162.4
2	Mixture of five (Austrian winter peas, rye, Oat, crimson clover, and hairy vetch )	2018-03-29	62	4	81
2	Mixture of five (Austrian winter peas, rye, Oat, crimson clover, and hairy vetch )	2018-03-29	62	5	54.2
2	Mixture of five (oats, wheat, crimson clover, radish, and turnip)	2018-03-29	62	1	66.4
2	Mixture of five (oats, wheat, crimson clover, radish, and turnip)	2018-03-29	62	2	78
2	Mixture of five (oats, wheat, crimson clover, radish, and turnip)	2018-03-29	62	3	73.4
2	Mixture of five (oats, wheat, crimson clover, radish, and turnip)	2018-03-29	62	4	81.6
2	Mixture of five (oats, wheat, crimson clover, radish, and turnip)	2018-03-29	62	5	60.6
2	Mixture of two (crimson clover and rye)	2018-03-29	62	1	33.6
2	Mixture of two (crimson clover and rye)	2018-03-29	62	2	75.4
2	Mixture of two (crimson clover and rye)	2018-03-29	62	3	78.4
2	Mixture of two (crimson clover and rye)	2018-03-29	62	4	53.6
2	Mixture of two (crimson clover and rye)	2018-03-29	62	5	96.8
2	Mixture of two (crimson clover and turnip)	2018-03-29	62	1	30.2
2	Mixture of two (crimson clover and turnip)	2018-03-29	62	2	55.6
2	Mixture of two (crimson clover and turnip)	2018-03-29	62	3	66
2	Mixture of two (crimson clover and turnip)	2018-03-29	62	4	31.8
2	Mixture of two (crimson clover and turnip)	2018-03-29	62	5	16
2	Mixture of two (oat and radish)	2018-03-29	62	1	81.6
2	Mixture of two (oat and radish)	2018-03-29	62	2	87.4
2	Mixture of two (oat and radish)	2018-03-29	62	3	49.6
2	Mixture of two (oat and radish)	2018-03-29	62	4	101.8
2	Mixture of two (oat and radish)	2018-03-29	62	5	43.6
2	Single species (crimson clover)	2018-03-29	62	1	3
2	Single species (crimson clover)	2018-03-29	62	2	9.6
2	Single species (crimson clover)	2018-03-29	62	3	12.2
2	Single species (crimson clover)	2018-03-29	62	4	9.6
2	Single species (crimson clover)	2018-03-29	62	5	4.8
2	Single species (rye)	2018-03-29	62	1	40.8
2	Single species (rye)	2018-03-29	62	2	54.4
2	Single species (rye)	2018-03-29	62	3	65.4
2	Single species (rye)	2018-03-29	62	4	67.8
2	Single species (rye)	2018-03-29	62	5	83.6
2	Mixture of five (Austrian winter peas, rye, Oat, crimson clover, and hairy vetch )	2018-05-02	96	1	320.8
2	Mixture of five (Austrian winter peas, rye, Oat, crimson clover, and hairy vetch )	2018-05-02	96	2	402.2
2	Mixture of five (Austrian winter peas, rye, Oat, crimson clover, and hairy vetch )	2018-05-02	96	3	627
2	Mixture of five (Austrian winter peas, rye, Oat, crimson clover, and hairy vetch )	2018-05-02	96	4	509
2	Mixture of five (Austrian winter peas, rye, Oat, crimson clover, and hairy vetch )	2018-05-02	96	5	682.8
2	Mixture of five (oats, wheat, crimson clover, radish, and turnip)	2018-05-02	96	1	319.4
2	Mixture of five (oats, wheat, crimson clover, radish, and turnip)	2018-05-02	96	2	286
2	Mixture of five (oats, wheat, crimson clover, radish, and turnip)	2018-05-02	96	3	324.4
2	Mixture of five (oats, wheat, crimson clover, radish, and turnip)	2018-05-02	96	4	474.6
2	Mixture of five (oats, wheat, crimson clover, radish, and turnip)	2018-05-02	96	5	406.6
2	Mixture of two (crimson clover and rye)	2018-05-02	96	1	236.8
2	Mixture of two (crimson clover and rye)	2018-05-02	96	2	430.4
2	Mixture of two (crimson clover and rye)	2018-05-02	96	3	377.2
2	Mixture of two (crimson clover and rye)	2018-05-02	96	4	251.4
2	Mixture of two (crimson clover and rye)	2018-05-02	96	5	499.6
2	Mixture of two (crimson clover and turnip)	2018-05-02	96	1	74.8
2	Mixture of two (crimson clover and turnip)	2018-05-02	96	2	126
2	Mixture of two (crimson clover and turnip)	2018-05-02	96	3	185.8
2	Mixture of two (crimson clover and turnip)	2018-05-02	96	4	272.4
2	Mixture of two (crimson clover and turnip)	2018-05-02	96	5	195.2
2	Mixture of two (oat and radish)	2018-05-02	96	1	458.2
2	Mixture of two (oat and radish)	2018-05-02	96	2	477.6
2	Mixture of two (oat and radish)	2018-05-02	96	3	319
2	Mixture of two (oat and radish)	2018-05-02	96	4	427.2
2	Mixture of two (oat and radish)	2018-05-02	96	5	260
2	Single species (crimson clover)	2018-05-02	96	1	48.8
2	Single species (crimson clover)	2018-05-02	96	2	214.4
2	Single species (crimson clover)	2018-05-02	96	3	538
2	Single species (crimson clover)	2018-05-02	96	4	210.2
2	Single species (crimson clover)	2018-05-02	96	5	177.2
2	Single species (rye)	2018-05-02	96	1	290
2	Single species (rye)	2018-05-02	96	2	333.8
2	Single species (rye)	2018-05-02	96	3	297.2
2	Single species (rye)	2018-05-02	96	4	281.4
2	Single species (rye)	2018-05-02	96	5	328.6
2	Mixture of five (Austrian winter peas, rye, Oat, crimson clover, and hairy vetch )	2018-05-10	104	1	669.6
2	Mixture of five (Austrian winter peas, rye, Oat, crimson clover, and hairy vetch )	2018-05-10	104	2	758.6
2	Mixture of five (Austrian winter peas, rye, Oat, crimson clover, and hairy vetch )	2018-05-10	104	3	707
2	Mixture of five (Austrian winter peas, rye, Oat, crimson clover, and hairy vetch )	2018-05-10	104	4	549.8
2	Mixture of five (Austrian winter peas, rye, Oat, crimson clover, and hairy vetch )	2018-05-10	104	5	555.4
2	Mixture of five (oats, wheat, crimson clover, radish, and turnip)	2018-05-10	104	1	431.8
2	Mixture of five (oats, wheat, crimson clover, radish, and turnip)	2018-05-10	104	2	599.6
2	Mixture of five (oats, wheat, crimson clover, radish, and turnip)	2018-05-10	104	3	520.6
2	Mixture of five (oats, wheat, crimson clover, radish, and turnip)	2018-05-10	104	4	486.2
2	Mixture of five (oats, wheat, crimson clover, radish, and turnip)	2018-05-10	104	5	505.8
2	Mixture of two (crimson clover and rye)	2018-05-10	104	1	126.2
2	Mixture of two (crimson clover and rye)	2018-05-10	104	2	345.6
2	Mixture of two (crimson clover and rye)	2018-05-10	104	3	460
2	Mixture of two (crimson clover and rye)	2018-05-10	104	4	692.2
2	Mixture of two (crimson clover and rye)	2018-05-10	104	5	309.8
2	Mixture of two (crimson clover and turnip)	2018-05-10	104	1	117.4
2	Mixture of two (crimson clover and turnip)	2018-05-10	104	2	159.8
2	Mixture of two (crimson clover and turnip)	2018-05-10	104	3	318
2	Mixture of two (crimson clover and turnip)	2018-05-10	104	4	287.4
2	Mixture of two (crimson clover and turnip)	2018-05-10	104	5	212.4
2	Mixture of two (oat and radish)	2018-05-10	104	1	474
2	Mixture of two (oat and radish)	2018-05-10	104	2	485.8
2	Mixture of two (oat and radish)	2018-05-10	104	3	670.2
2	Mixture of two (oat and radish)	2018-05-10	104	4	521.2
2	Mixture of two (oat and radish)	2018-05-10	104	5	424.8
2	Single species (crimson clover)	2018-05-10	104	1	70.2
2	Single species (crimson clover)	2018-05-10	104	2	175.2
2	Single species (crimson clover)	2018-05-10	104	3	412.6
2	Single species (crimson clover)	2018-05-10	104	4	220.8
2	Single species (crimson clover)	2018-05-10	104	5	113.4
2	Single species (rye)	2018-05-10	104	1	256.6
2	Single species (rye)	2018-05-10	104	2	397.8
2	Single species (rye)	2018-05-10	104	3	447.8
2	Single species (rye)	2018-05-10	104	4	638.8
2	Single species (rye)	2018-05-10	104	5	560.2

## Sheet: Volumetric soil water content
Table S2. Data collected on volumetric soil water content at 10, 20, 30, 40, and 60 cm depths under each of the seven cover crop treatments and two control treatments [Fallow with herbicide application (control-1) and fallow without herbicide application (control-2)] on multiple measurement dates during season-1 (2016-2017) and season-2 (2018). DAP- Days after planting
Season	Date	DAP	Replication	Treatments	Depth (cm)	Volumetric soil water content (m3 m-3)
1	2017-01-21	74	1	Mixture of five (Austrian winter peas, rye, wheat, crimson clover, hairy vetch, and oats)	10	0.026
1	2017-01-21	74	1	Mixture of five (Austrian winter peas, rye, wheat, crimson clover, hairy vetch, and oats)	20	0.06
1	2017-01-21	74	1	Mixture of five (Austrian winter peas, rye, wheat, crimson clover, hairy vetch, and oats)	30	0.18725
1	2017-01-21	74	1	Mixture of five (Austrian winter peas, rye, wheat, crimson clover, hairy vetch, and oats)	40	0.29175
1	2017-01-21	74	1	Mixture of five (Austrian winter peas, rye, wheat, crimson clover, hairy vetch, and oats)	60	0.3325
1	2017-01-21	74	2	Mixture of five (Austrian winter peas, rye, wheat, crimson clover, hairy vetch, and oats)	10	0.06075
1	2017-01-21	74	2	Mixture of five (Austrian winter peas, rye, wheat, crimson clover, hairy vetch, and oats)	20	0.306
1	2017-01-21	74	2	Mixture of five (Austrian winter peas, rye, wheat, crimson clover, hairy vetch, and oats)	30	0.32975
1	2017-01-21	74	2	Mixture of five (Austrian winter peas, rye, wheat, crimson clover, hairy vetch, and oats)	40	0.3385
1	2017-01-21	74	2	Mixture of five (Austrian winter peas, rye, wheat, crimson clover, hairy vetch, and oats)	60	0.33025
1	2017-01-21	74	3	Mixture of five (Austrian winter peas, rye, wheat, crimson clover, hairy vetch, and oats)	10	0.135
1	2017-01-21	74	3	Mixture of five (Austrian winter peas, rye, wheat, crimson clover, hairy vetch, and oats)	20	0.275
1	2017-01-21	74	3	Mixture of five (Austrian winter peas, rye, wheat, crimson clover, hairy vetch, and oats)	30	0.31175
1	2017-01-21	74	3	Mixture of five (Austrian winter peas, rye, wheat, crimson clover, hairy vetch, and oats)	40	0.33625
1	2017-01-21	74	3	Mixture of five (Austrian winter peas, rye, wheat, crimson clover, hairy vetch, and oats)	60	0.3585
1	2017-01-21	74	4	Mixture of five (Austrian winter peas, rye, wheat, crimson clover, hairy vetch, and oats)	10	0.07425
1	2017-01-21	74	4	Mixture of five (Austrian winter peas, rye, wheat, crimson clover, hairy vetch, and oats)	20	0.17275
1	2017-01-21	74	4	Mixture of five (Austrian winter peas, rye, wheat, crimson clover, hairy vetch, and oats)	30	0.287
1	2017-01-21	74	4	Mixture of five (Austrian winter peas, rye, wheat, crimson clover, hairy vetch, and oats)	40	0.35925
1	2017-01-21	74	4	Mixture of five (Austrian winter peas, rye, wheat, crimson clover, hairy vetch, and oats)	60	0.304
1	2017-01-21	74	5	Mixture of five (Austrian winter peas, rye, wheat, crimson clover, hairy vetch, and oats)	10	0.17075
1	2017-01-21	74	5	Mixture of five (Austrian winter peas, rye, wheat, crimson clover, hairy vetch, and oats)	20	0.265
1	2017-01-21	74	5	Mixture of five (Austrian winter peas, rye, wheat, crimson clover, hairy vetch, and oats)	30	0.33425
1	2017-01-21	74	5	Mixture of five (Austrian winter peas, rye, wheat, crimson clover, hairy vetch, and oats)	40	0.3795
1	2017-01-21	74	5	Mixture of five (Austrian winter peas, rye, wheat, crimson clover, hairy vetch, and oats)	60	0.40575
1	2017-01-21	74	1	Mixture of five (oats, wheat, crimson clover, radish, and turnip)	10	0.00157143
1	2017-01-21	74	1	Mixture of five (oats, wheat, crimson clover, radish, and turnip)	20	0.0665714
1	2017-01-21	74	1	Mixture of five (oats, wheat, crimson clover, radish, and turnip)	30	0.190429
1	2017-01-21	74	1	Mixture of five (oats, wheat, crimson clover, radish, and turnip)	40	0.294857
1	2017-01-21	74	1	Mixture of five (oats, wheat, crimson clover, radish, and turnip)	60	0.344286
1	2017-01-21	74	2	Mixture of five (oats, wheat, crimson clover, radish, and turnip)	10	0.121
1	2017-01-21	74	2	Mixture of five (oats, wheat, crimson clover, radish, and turnip)	20	0.264
1	2017-01-21	74	2	Mixture of five (oats, wheat, crimson clover, radish, and turnip)	30	0.30275
1	2017-01-21	74	2	Mixture of five (oats, wheat, crimson clover, radish, and turnip)	40	0.32725
1	2017-01-21	74	2	Mixture of five (oats, wheat, crimson clover, radish, and turnip)	60	0.34175
1	2017-01-21	74	3	Mixture of five (oats, wheat, crimson clover, radish, and turnip)	10	0.12775
1	2017-01-21	74	3	Mixture of five (oats, wheat, crimson clover, radish, and turnip)	20	0.218
1	2017-01-21	74	3	Mixture of five (oats, wheat, crimson clover, radish, and turnip)	30	0.30075
1	2017-01-21	74	3	Mixture of five (oats, wheat, crimson clover, radish, and turnip)	40	0.3085
1	2017-01-21	74	3	Mixture of five (oats, wheat, crimson clover, radish, and turnip)	60	0.3645
1	2017-01-21	74	4	Mixture of five (oats, wheat, crimson clover, radish, and turnip)	10	0.02675
1	2017-01-21	74	4	Mixture of five (oats, wheat, crimson clover, radish, and turnip)	20	0.14825
1	2017-01-21	74	4	Mixture of five (oats, wheat, crimson clover, radish, and turnip)	30	0.332
1	2017-01-21	74	4	Mixture of five (oats, wheat, crimson clover, radish, and turnip)	40	0.36175
1	2017-01-21	74	4	Mixture of five (oats, wheat, crimson clover, radish, and turnip)	60	0.38175
1	2017-01-21	74	5	Mixture of five (oats, wheat, crimson clover, radish, and turnip)	10	0.11825
1	2017-01-21	74	5	Mixture of five (oats, wheat, crimson clover, radish, and turnip)	20	0.24425
1	2017-01-21	74	5	Mixture of five (oats, wheat, crimson clover, radish, and turnip)	30	0.30475
1	2017-01-21	74	5	Mixture of five (oats, wheat, crimson clover, radish, and turnip)	40	0.3095
1	2017-01-21	74	5	Mixture of five (oats, wheat, crimson clover, radish, and turnip)	60	0.25525
1	2017-01-21	74	1	Mixture of two (crimson clover and rye)	10	0.009
1	2017-01-21	74	1	Mixture of two (crimson clover and rye)	20	0.0695
1	2017-01-21	74	1	Mixture of two (crimson clover and rye)	30	0.1845
1	2017-01-21	74	1	Mixture of two (crimson clover and rye)	40	0.23675
1	2017-01-21	74	1	Mixture of two (crimson clover and rye)	60	0.236
1	2017-01-21	74	2	Mixture of two (crimson clover and rye)	10	0.11475
1	2017-01-21	74	2	Mixture of two (crimson clover and rye)	20	0.25925
1	2017-01-21	74	2	Mixture of two (crimson clover and rye)	30	0.3005
1	2017-01-21	74	2	Mixture of two (crimson clover and rye)	40	0.32575
1	2017-01-21	74	2	Mixture of two (crimson clover and rye)	60	0.34125
1	2017-01-21	74	3	Mixture of two (crimson clover and rye)	10	0.05525
1	2017-01-21	74	3	Mixture of two (crimson clover and rye)	20	0.09875
1	2017-01-21	74	3	Mixture of two (crimson clover and rye)	30	0.20875
1	2017-01-21	74	3	Mixture of two (crimson clover and rye)	40	0.28375
1	2017-01-21	74	3	Mixture of two (crimson clover and rye)	60	0.359
1	2017-01-21	74	4	Mixture of two (crimson clover and rye)	10	0.06475
1	2017-01-21	74	4	Mixture of two (crimson clover and rye)	20	0.16175
1	2017-01-21	74	4	Mixture of two (crimson clover and rye)	30	0.2975
1	2017-01-21	74	4	Mixture of two (crimson clover and rye)	40	0.304
1	2017-01-21	74	4	Mixture of two (crimson clover and rye)	60	0.356
1	2017-01-21	74	5	Mixture of two (crimson clover and rye)	10	0.1255
1	2017-01-21	74	5	Mixture of two (crimson clover and rye)	20	0.28825
1	2017-01-21	74	5	Mixture of two (crimson clover and rye)	30	0.25525
1	2017-01-21	74	5	Mixture of two (crimson clover and rye)	40	0.25375
1	2017-01-21	74	5	Mixture of two (crimson clover and rye)	60	0.34125
1	2017-01-21	74	1	Mixture of two (oat and radish)	10	0.025
1	2017-01-21	74	1	Mixture of two (oat and radish)	20	0.07325
1	2017-01-21	74	1	Mixture of two (oat and radish)	30	0.17275
1	2017-01-21	74	1	Mixture of two (oat and radish)	40	0.30025
1	2017-01-21	74	1	Mixture of two (oat and radish)	60	0.31675
1	2017-01-21	74	2	Mixture of two (oat and radish)	10	0.05375
1	2017-01-21	74	2	Mixture of two (oat and radish)	20	0.139
1	2017-01-21	74	2	Mixture of two (oat and radish)	30	0.2935
1	2017-01-21	74	2	Mixture of two (oat and radish)	40	0.32825
1	2017-01-21	74	2	Mixture of two (oat and radish)	60	0.356
1	2017-01-21	74	3	Mixture of two (oat and radish)	10	0.0675
1	2017-01-21	74	3	Mixture of two (oat and radish)	20	0.22575
1	2017-01-21	74	3	Mixture of two (oat and radish)	30	0.3415
1	2017-01-21	74	3	Mixture of two (oat and radish)	40	0.361
1	2017-01-21	74	3	Mixture of two (oat and radish)	60	0.34875
1	2017-01-21	74	4	Mixture of two (oat and radish)	10	0.057
1	2017-01-21	74	4	Mixture of two (oat and radish)	20	0.216
1	2017-01-21	74	4	Mixture of two (oat and radish)	30	0.3385
1	2017-01-21	74	4	Mixture of two (oat and radish)	40	0.3495
1	2017-01-21	74	4	Mixture of two (oat and radish)	60	0.33225
1	2017-01-21	74	5	Mixture of two (oat and radish)	10	0.1628
1	2017-01-21	74	5	Mixture of two (oat and radish)	20	0.328
1	2017-01-21	74	5	Mixture of two (oat and radish)	30	0.3368
1	2017-01-21	74	5	Mixture of two (oat and radish)	40	0.3694
1	2017-01-21	74	5	Mixture of two (oat and radish)	60	0.398
1	2017-01-21	74	1	Mixture of two (crimson clover and turnip)	10	0.0195
1	2017-01-21	74	1	Mixture of two (crimson clover and turnip)	20	0.04725
1	2017-01-21	74	1	Mixture of two (crimson clover and turnip)	30	0.14125
1	2017-01-21	74	1	Mixture of two (crimson clover and turnip)	40	0.27
1	2017-01-21	74	1	Mixture of two (crimson clover and turnip)	60	0.32425
1	2017-01-21	74	2	Mixture of two (crimson clover and turnip)	10	0.11775
1	2017-01-21	74	2	Mixture of two (crimson clover and turnip)	20	0.20525
1	2017-01-21	74	2	Mixture of two (crimson clover and turnip)	30	0.2985
1	2017-01-21	74	2	Mixture of two (crimson clover and turnip)	40	0.32
1	2017-01-21	74	2	Mixture of two (crimson clover and turnip)	60	0.34575
1	2017-01-21	74	3	Mixture of two (crimson clover and turnip)	10	0.1035
1	2017-01-21	74	3	Mixture of two (crimson clover and turnip)	20	0.27975
1	2017-01-21	74	3	Mixture of two (crimson clover and turnip)	30	0.34125
1	2017-01-21	74	3	Mixture of two (crimson clover and turnip)	40	0.345
1	2017-01-21	74	3	Mixture of two (crimson clover and turnip)	60	0.3385
1	2017-01-21	74	5	Mixture of two (crimson clover and turnip)	10	0.1785
1	2017-01-21	74	5	Mixture of two (crimson clover and turnip)	20	0.30625
1	2017-01-21	74	5	Mixture of two (crimson clover and turnip)	30	0.28175
1	2017-01-21	74	5	Mixture of two (crimson clover and turnip)	40	0.30675
1	2017-01-21	74	5	Mixture of two (crimson clover and turnip)	60	0.369
1	2017-01-21	74	1	Single species (crimson clover)	10	0.0235
1	2017-01-21	74	1	Single species (crimson clover)	20	0.10725
1	2017-01-21	74	1	Single species (crimson clover)	30	0.25275
1	2017-01-21	74	1	Single species (crimson clover)	40	0.3325
1	2017-01-21	74	1	Single species (crimson clover)	60	0.32625
1	2017-01-21	74	2	Single species (crimson clover)	10	0.093
1	2017-01-21	74	2	Single species (crimson clover)	20	0.26425
1	2017-01-21	74	2	Single species (crimson clover)	30	0.2975
1	2017-01-21	74	2	Single species (crimson clover)	40	0.27175
1	2017-01-21	74	2	Single species (crimson clover)	60	0.348
1	2017-01-21	74	3	Single species (crimson clover)	10	0.1095
1	2017-01-21	74	3	Single species (crimson clover)	20	0.25775
1	2017-01-21	74	3	Single species (crimson clover)	30	0.2995
1	2017-01-21	74	3	Single species (crimson clover)	40	0.3325
1	2017-01-21	74	3	Single species (crimson clover)	60	0.37675
1	2017-01-21	74	4	Single species (crimson clover)	10	0.0136667
1	2017-01-21	74	4	Single species (crimson clover)	20	0.1154
1	2017-01-21	74	4	Single species (crimson clover)	30	0.3542
1	2017-01-21	74	4	Single species (crimson clover)	40	0.367
1	2017-01-21	74	4	Single species (crimson clover)	60	0.3688
1	2017-01-21	74	5	Single species (crimson clover)	10	0.0478
1	2017-01-21	74	5	Single species (crimson clover)	20	0.196
1	2017-01-21	74	5	Single species (crimson clover)	30	0.3564
1	2017-01-21	74	5	Single species (crimson clover)	40	0.4
1	2017-01-21	74	5	Single species (crimson clover)	60	0.4048
1	2017-01-21	74	1	Single species (rye)	10	0.125
1	2017-01-21	74	1	Single species (rye)	20	0.265
1	2017-01-21	74	1	Single species (rye)	30	0.2875
1	2017-01-21	74	1	Single species (rye)	40	0.3025
1	2017-01-21	74	1	Single species (rye)	60	0.343
1	2017-01-21	74	2	Single species (rye)	10	0.1345
1	2017-01-21	74	2	Single species (rye)	20	0.26075
1	2017-01-21	74	2	Single species (rye)	30	0.3
1	2017-01-21	74	2	Single species (rye)	40	0.31775
1	2017-01-21	74	2	Single species (rye)	60	0.35375
1	2017-01-21	74	3	Single species (rye)	10	0.059
1	2017-01-21	74	3	Single species (rye)	20	0.25375
1	2017-01-21	74	3	Single species (rye)	30	0.30925
1	2017-01-21	74	3	Single species (rye)	40	0.34525
1	2017-01-21	74	3	Single species (rye)	60	0.36125
1	2017-01-21	74	4	Single species (rye)	10	0.09125
1	2017-01-21	74	4	Single species (rye)	20	0.25175
1	2017-01-21	74	4	Single species (rye)	30	0.3005
1	2017-01-21	74	4	Single species (rye)	40	0.31175
1	2017-01-21	74	4	Single species (rye)	60	0.34475
1	2017-01-21	74	5	Single species (rye)	10	0.15525
1	2017-01-21	74	5	Single species (rye)	20	0.29125
1	2017-01-21	74	5	Single species (rye)	30	0.31725
1	2017-01-21	74	5	Single species (rye)	40	0.365
1	2017-01-21	74	5	Single species (rye)	60	0.3835
1	2017-01-21	74	1	Control 1 - Fallow with herbicide control	10	0.06875
1	2017-01-21	74	1	Control 1 - Fallow with herbicide control	20	0.256
1	2017-01-21	74	1	Control 1 - Fallow with herbicide control	30	0.259
1	2017-01-21	74	1	Control 1 - Fallow with herbicide control	40	0.2475
1	2017-01-21	74	1	Control 1 - Fallow with herbicide control	60	0.361
1	2017-01-21	74	2	Control 1 - Fallow with herbicide control	10	0.0515
1	2017-01-21	74	2	Control 1 - Fallow with herbicide control	20	0.15425
1	2017-01-21	74	2	Control 1 - Fallow with herbicide control	30	0.28375
1	2017-01-21	74	2	Control 1 - Fallow with herbicide control	40	0.273
1	2017-01-21	74	2	Control 1 - Fallow with herbicide control	60	0.3305
1	2017-01-21	74	3	Control 1 - Fallow with herbicide control	10	0.0465
1	2017-01-21	74	3	Control 1 - Fallow with herbicide control	20	0.1495
1	2017-01-21	74	3	Control 1 - Fallow with herbicide control	30	0.28275
1	2017-01-21	74	3	Control 1 - Fallow with herbicide control	40	0.2685
1	2017-01-21	74	3	Control 1 - Fallow with herbicide control	60	0.335
1	2017-01-21	74	4	Control 1 - Fallow with herbicide control	10	0.031
1	2017-01-21	74	4	Control 1 - Fallow with herbicide control	20	0.11225
1	2017-01-21	74	4	Control 1 - Fallow with herbicide control	30	0.24725
1	2017-01-21	74	4	Control 1 - Fallow with herbicide control	40	0.36125
1	2017-01-21	74	4	Control 1 - Fallow with herbicide control	60	0.38475
1	2017-01-21	74	5	Control 1 - Fallow with herbicide control	10	0.086
1	2017-01-21	74	5	Control 1 - Fallow with herbicide control	20	0.1115
1	2017-01-21	74	5	Control 1 - Fallow with herbicide control	30	0.3425
1	2017-01-21	74	5	Control 1 - Fallow with herbicide control	40	0.3215
1	2017-01-21	74	5	Control 1 - Fallow with herbicide control	60	0.30825
1	2017-01-21	74	1	Control 2 - Fallow without herbicide control	10	0.01475
1	2017-01-21	74	1	Control 2 - Fallow without herbicide control	20	0.0955
1	2017-01-21	74	1	Control 2 - Fallow without herbicide control	30	0.1205
1	2017-01-21	74	1	Control 2 - Fallow without herbicide control	40	0.20925
1	2017-01-21	74	1	Control 2 - Fallow without herbicide control	60	0.283
1	2017-01-21	74	2	Control 2 - Fallow without herbicide control	10	0.12925
1	2017-01-21	74	2	Control 2 - Fallow without herbicide control	20	0.22325
1	2017-01-21	74	2	Control 2 - Fallow without herbicide control	30	0.283
1	2017-01-21	74	2	Control 2 - Fallow without herbicide control	40	0.3255
1	2017-01-21	74	2	Control 2 - Fallow without herbicide control	60	0.37175
1	2017-01-21	74	3	Control 2 - Fallow without herbicide control	10	0.14775
1	2017-01-21	74	3	Control 2 - Fallow without herbicide control	20	0.24475
1	2017-01-21	74	3	Control 2 - Fallow without herbicide control	30	0.26675
1	2017-01-21	74	3	Control 2 - Fallow without herbicide control	40	0.30825
1	2017-01-21	74	3	Control 2 - Fallow without herbicide control	60	0.3245
1	2017-01-21	74	5	Control 2 - Fallow without herbicide control	10	0.15575
1	2017-01-21	74	5	Control 2 - Fallow without herbicide control	20	0.27275
1	2017-01-21	74	5	Control 2 - Fallow without herbicide control	30	0.2785
1	2017-01-21	74	5	Control 2 - Fallow without herbicide control	40	0.264
1	2017-01-21	74	5	Control 2 - Fallow without herbicide control	60	0.2375
1	2017-01-30	83	1	Mixture of five (Austrian winter peas, rye, wheat, crimson clover, hairy vetch, and oats)	10	0.027
1	2017-01-30	83	1	Mixture of five (Austrian winter peas, rye, wheat, crimson clover, hairy vetch, and oats)	20	0.0765
1	2017-01-30	83	1	Mixture of five (Austrian winter peas, rye, wheat, crimson clover, hairy vetch, and oats)	30	0.217
1	2017-01-30	83	1	Mixture of five (Austrian winter peas, rye, wheat, crimson clover, hairy vetch, and oats)	40	0.30525
1	2017-01-30	83	1	Mixture of five (Austrian winter peas, rye, wheat, crimson clover, hairy vetch, and oats)	60	0.33975
1	2017-01-30	83	2	Mixture of five (Austrian winter peas, rye, wheat, crimson clover, hairy vetch, and oats)	10	0.0565
1	2017-01-30	83	2	Mixture of five (Austrian winter peas, rye, wheat, crimson clover, hairy vetch, and oats)	20	0.16875
1	2017-01-30	83	2	Mixture of five (Austrian winter peas, rye, wheat, crimson clover, hairy vetch, and oats)	30	0.28925
1	2017-01-30	83	2	Mixture of five (Austrian winter peas, rye, wheat, crimson clover, hairy vetch, and oats)	40	0.28375
1	2017-01-30	83	2	Mixture of five (Austrian winter peas, rye, wheat, crimson clover, hairy vetch, and oats)	60	0.3295
1	2017-01-30	83	3	Mixture of five (Austrian winter peas, rye, wheat, crimson clover, hairy vetch, and oats)	10	0.1395
1	2017-01-30	83	3	Mixture of five (Austrian winter peas, rye, wheat, crimson clover, hairy vetch, and oats)	20	0.284
1	2017-01-30	83	3	Mixture of five (Austrian winter peas, rye, wheat, crimson clover, hairy vetch, and oats)	30	0.323
1	2017-01-30	83	3	Mixture of five (Austrian winter peas, rye, wheat, crimson clover, hairy vetch, and oats)	40	0.34925
1	2017-01-30	83	3	Mixture of five (Austrian winter peas, rye, wheat, crimson clover, hairy vetch, and oats)	60	0.367
1	2017-01-30	83	4	Mixture of five (Austrian winter peas, rye, wheat, crimson clover, hairy vetch, and oats)	10	0.0762
1	2017-01-30	83	4	Mixture of five (Austrian winter peas, rye, wheat, crimson clover, hairy vetch, and oats)	20	0.1736
1	2017-01-30	83	4	Mixture of five (Austrian winter peas, rye, wheat, crimson clover, hairy vetch, and oats)	30	0.2902
1	2017-01-30	83	4	Mixture of five (Austrian winter peas, rye, wheat, crimson clover, hairy vetch, and oats)	40	0.3696
1	2017-01-30	83	4	Mixture of five (Austrian winter peas, rye, wheat, crimson clover, hairy vetch, and oats)	60	0.315
1	2017-01-30	83	5	Mixture of five (Austrian winter peas, rye, wheat, crimson clover, hairy vetch, and oats)	10	0.169
1	2017-01-30	83	5	Mixture of five (Austrian winter peas, rye, wheat, crimson clover, hairy vetch, and oats)	20	0.266
1	2017-01-30	83	5	Mixture of five (Austrian winter peas, rye, wheat, crimson clover, hairy vetch, and oats)	30	0.341
1	2017-01-30	83	5	Mixture of five (Austrian winter peas, rye, wheat, crimson clover, hairy vetch, and oats)	40	0.3845
1	2017-01-30	83	5	Mixture of five (Austrian winter peas, rye, wheat, crimson clover, hairy vetch, and oats)	60	0.40825
1	2017-01-30	83	1	Mixture of five (oats, wheat, crimson clover, radish, and turnip)	10	0.0175
1	2017-01-30	83	1	Mixture of five (oats, wheat, crimson clover, radish, and turnip)	20	0.15575
1	2017-01-30	83	1	Mixture of five (oats, wheat, crimson clover, radish, and turnip)	30	0.2275
1	2017-01-30	83	1	Mixture of five (oats, wheat, crimson clover, radish, and turnip)	40	0.315
1	2017-01-30	83	1	Mixture of five (oats, wheat, crimson clover, radish, and turnip)	60	0.3555
1	2017-01-30	83	2	Mixture of five (oats, wheat, crimson clover, radish, and turnip)	10	0.067
1	2017-01-30	83	2	Mixture of five (oats, wheat, crimson clover, radish, and turnip)	20	0.157
1	2017-01-30	83	2	Mixture of five (oats, wheat, crimson clover, radish, and turnip)	30	0.309
1	2017-01-30	83	2	Mixture of five (oats, wheat, crimson clover, radish, and turnip)	40	0.3465
1	2017-01-30	83	2	Mixture of five (oats, wheat, crimson clover, radish, and turnip)	60	0.36875
1	2017-01-30	83	3	Mixture of five (oats, wheat, crimson clover, radish, and turnip)	10	0.12825
1	2017-01-30	83	3	Mixture of five (oats, wheat, crimson clover, radish, and turnip)	20	0.224
1	2017-01-30	83	3	Mixture of five (oats, wheat, crimson clover, radish, and turnip)	30	0.30725
1	2017-01-30	83	3	Mixture of five (oats, wheat, crimson clover, radish, and turnip)	40	0.32025
1	2017-01-30	83	3	Mixture of five (oats, wheat, crimson clover, radish, and turnip)	60	0.375
1	2017-01-30	83	4	Mixture of five (oats, wheat, crimson clover, radish, and turnip)	10	0.04675
1	2017-01-30	83	4	Mixture of five (oats, wheat, crimson clover, radish, and turnip)	20	0.1895
1	2017-01-30	83	4	Mixture of five (oats, wheat, crimson clover, radish, and turnip)	30	0.354
1	2017-01-30	83	4	Mixture of five (oats, wheat, crimson clover, radish, and turnip)	40	0.3735
1	2017-01-30	83	4	Mixture of five (oats, wheat, crimson clover, radish, and turnip)	60	0.3935
1	2017-01-30	83	5	Mixture of five (oats, wheat, crimson clover, radish, and turnip)	10	0.13075
1	2017-01-30	83	5	Mixture of five (oats, wheat, crimson clover, radish, and turnip)	20	0.26225
1	2017-01-30	83	5	Mixture of five (oats, wheat, crimson clover, radish, and turnip)	30	0.3165
1	2017-01-30	83	5	Mixture of five (oats, wheat, crimson clover, radish, and turnip)	40	0.3175
1	2017-01-30	83	5	Mixture of five (oats, wheat, crimson clover, radish, and turnip)	60	0.2615
1	2017-01-30	83	1	Mixture of two (crimson clover and rye)	10	0.01325
1	2017-01-30	83	1	Mixture of two (crimson clover and rye)	20	0.0785
1	2017-01-30	83	1	Mixture of two (crimson clover and rye)	30	0.17275
1	2017-01-30	83	1	Mixture of two (crimson clover and rye)	40	0.25375
1	2017-01-30	83	1	Mixture of two (crimson clover and rye)	60	0.25
1	2017-01-30	83	2	Mixture of two (crimson clover and rye)	10	0.12725
1	2017-01-30	83	2	Mixture of two (crimson clover and rye)	20	0.27675
1	2017-01-30	83	2	Mixture of two (crimson clover and rye)	30	0.3195
1	2017-01-30	83	2	Mixture of two (crimson clover and rye)	40	0.34275
1	2017-01-30	83	2	Mixture of two (crimson clover and rye)	60	0.358
1	2017-01-30	83	3	Mixture of two (crimson clover and rye)	10	0.058
1	2017-01-30	83	3	Mixture of two (crimson clover and rye)	20	0.1045
1	2017-01-30	83	3	Mixture of two (crimson clover and rye)	30	0.21875
1	2017-01-30	83	3	Mixture of two (crimson clover and rye)	40	0.2955
1	2017-01-30	83	3	Mixture of two (crimson clover and rye)	60	0.36775
1	2017-01-30	83	4	Mixture of two (crimson clover and rye)	10	0.07275
1	2017-01-30	83	4	Mixture of two (crimson clover and rye)	20	0.16925
1	2017-01-30	83	4	Mixture of two (crimson clover and rye)	30	0.309
1	2017-01-30	83	4	Mixture of two (crimson clover and rye)	40	0.31925
1	2017-01-30	83	4	Mixture of two (crimson clover and rye)	60	0.36875
1	2017-01-30	83	5	Mixture of two (crimson clover and rye)	10	0.139
1	2017-01-30	83	5	Mixture of two (crimson clover and rye)	20	0.29475
1	2017-01-30	83	5	Mixture of two (crimson clover and rye)	30	0.267
1	2017-01-30	83	5	Mixture of two (crimson clover and rye)	40	0.268
1	2017-01-30	83	5	Mixture of two (crimson clover and rye)	60	0.35525
1	2017-01-30	83	1	Mixture of two (oat and radish)	10	0.0325
1	2017-01-30	83	1	Mixture of two (oat and radish)	20	0.08725
1	2017-01-30	83	1	Mixture of two (oat and radish)	30	0.20025
1	2017-01-30	83	1	Mixture of two (oat and radish)	40	0.31225
1	2017-01-30	83	1	Mixture of two (oat and radish)	60	0.3285
1	2017-01-30	83	2	Mixture of two (oat and radish)	10	0.15375
1	2017-01-30	83	2	Mixture of two (oat and radish)	20	0.274
1	2017-01-30	83	2	Mixture of two (oat and radish)	30	0.3195
1	2017-01-30	83	2	Mixture of two (oat and radish)	40	0.33775
1	2017-01-30	83	2	Mixture of two (oat and radish)	60	0.37125
1	2017-01-30	83	3	Mixture of two (oat and radish)	10	0.07175
1	2017-01-30	83	3	Mixture of two (oat and radish)	20	0.242
1	2017-01-30	83	3	Mixture of two (oat and radish)	30	0.357
1	2017-01-30	83	3	Mixture of two (oat and radish)	40	0.378
1	2017-01-30	83	3	Mixture of two (oat and radish)	60	0.35975
1	2017-01-30	83	4	Mixture of two (oat and radish)	10	0.06025
1	2017-01-30	83	4	Mixture of two (oat and radish)	20	0.2355
1	2017-01-30	83	4	Mixture of two (oat and radish)	30	0.3535
1	2017-01-30	83	4	Mixture of two (oat and radish)	40	0.356
1	2017-01-30	83	4	Mixture of two (oat and radish)	60	0.3405
1	2017-01-30	83	5	Mixture of two (oat and radish)	10	0.1515
1	2017-01-30	83	5	Mixture of two (oat and radish)	20	0.333
1	2017-01-30	83	5	Mixture of two (oat and radish)	30	0.33925
1	2017-01-30	83	5	Mixture of two (oat and radish)	40	0.36575
1	2017-01-30	83	5	Mixture of two (oat and radish)	60	0.3975
1	2017-01-30	83	1	Mixture of two (crimson clover and turnip)	10	0.01925
1	2017-01-30	83	1	Mixture of two (crimson clover and turnip)	20	0.075
1	2017-01-30	83	1	Mixture of two (crimson clover and turnip)	30	0.183
1	2017-01-30	83	1	Mixture of two (crimson clover and turnip)	40	0.29525
1	2017-01-30	83	1	Mixture of two (crimson clover and turnip)	60	0.316
1	2017-01-30	83	2	Mixture of two (crimson clover and turnip)	10	0.12925
1	2017-01-30	83	2	Mixture of two (crimson clover and turnip)	20	0.2835
1	2017-01-30	83	2	Mixture of two (crimson clover and turnip)	30	0.31325
1	2017-01-30	83	2	Mixture of two (crimson clover and turnip)	40	0.33875
1	2017-01-30	83	2	Mixture of two (crimson clover and turnip)	60	0.38825
1	2017-01-30	83	3	Mixture of two (crimson clover and turnip)	10	0.10675
1	2017-01-30	83	3	Mixture of two (crimson clover and turnip)	20	0.28875
1	2017-01-30	83	3	Mixture of two (crimson clover and turnip)	30	0.3545
1	2017-01-30	83	3	Mixture of two (crimson clover and turnip)	40	0.35825
1	2017-01-30	83	3	Mixture of two (crimson clover and turnip)	60	0.352
1	2017-01-30	83	5	Mixture of two (crimson clover and turnip)	10	0.17675
1	2017-01-30	83	5	Mixture of two (crimson clover and turnip)	20	0.31625
1	2017-01-30	83	5	Mixture of two (crimson clover and turnip)	30	0.2905
1	2017-01-30	83	5	Mixture of two (crimson clover and turnip)	40	0.319
1	2017-01-30	83	5	Mixture of two (crimson clover and turnip)	60	0.37575
1	2017-01-30	83	1	Single species (crimson clover)	10	0.03575
1	2017-01-30	83	1	Single species (crimson clover)	20	0.12425
1	2017-01-30	83	1	Single species (crimson clover)	30	0.2785
1	2017-01-30	83	1	Single species (crimson clover)	40	0.34575
1	2017-01-30	83	1	Single species (crimson clover)	60	0.33625
1	2017-01-30	83	2	Single species (crimson clover)	10	0.16425
1	2017-01-30	83	2	Single species (crimson clover)	20	0.2295
1	2017-01-30	83	2	Single species (crimson clover)	30	0.29025
1	2017-01-30	83	2	Single species (crimson clover)	40	0.34125
1	2017-01-30	83	2	Single species (crimson clover)	60	0.37725
1	2017-01-30	83	3	Single species (crimson clover)	10	0.136
1	2017-01-30	83	3	Single species (crimson clover)	20	0.27125
1	2017-01-30	83	3	Single species (crimson clover)	30	0.30125
1	2017-01-30	83	3	Single species (crimson clover)	40	0.34375
1	2017-01-30	83	3	Single species (crimson clover)	60	0.38425
1	2017-01-30	83	4	Single species (crimson clover)	10	0.024
1	2017-01-30	83	4	Single species (crimson clover)	20	0.1285
1	2017-01-30	83	4	Single species (crimson clover)	30	0.359
1	2017-01-30	83	4	Single species (crimson clover)	40	0.3745
1	2017-01-30	83	4	Single species (crimson clover)	60	0.3745
1	2017-01-30	83	5	Single species (crimson clover)	10	0.06025
1	2017-01-30	83	5	Single species (crimson clover)	20	0.21125
1	2017-01-30	83	5	Single species (crimson clover)	30	0.365
1	2017-01-30	83	5	Single species (crimson clover)	40	0.40525
1	2017-01-30	83	5	Single species (crimson clover)	60	0.4155
1	2017-01-30	83	1	Single species (rye)	10	0.132
1	2017-01-30	83	1	Single species (rye)	20	0.2735
1	2017-01-30	83	1	Single species (rye)	30	0.30175
1	2017-01-30	83	1	Single species (rye)	40	0.31975
1	2017-01-30	83	1	Single species (rye)	60	0.35625
1	2017-01-30	83	2	Single species (rye)	10	0.1305
1	2017-01-30	83	2	Single species (rye)	20	0.2795
1	2017-01-30	83	2	Single species (rye)	30	0.298
1	2017-01-30	83	2	Single species (rye)	40	0.28375
1	2017-01-30	83	2	Single species (rye)	60	0.36175
1	2017-01-30	83	3	Single species (rye)	10	0.0645
1	2017-01-30	83	3	Single species (rye)	20	0.27075
1	2017-01-30	83	3	Single species (rye)	30	0.324
1	2017-01-30	83	3	Single species (rye)	40	0.358
1	2017-01-30	83	3	Single species (rye)	60	0.37425
1	2017-01-30	83	4	Single species (rye)	10	0.09675
1	2017-01-30	83	4	Single species (rye)	20	0.263
1	2017-01-30	83	4	Single species (rye)	30	0.309
1	2017-01-30	83	4	Single species (rye)	40	0.3205
1	2017-01-30	83	4	Single species (rye)	60	0.3525
1	2017-01-30	83	5	Single species (rye)	10	0.15875
1	2017-01-30	83	5	Single species (rye)	20	0.29575
1	2017-01-30	83	5	Single species (rye)	30	0.326
1	2017-01-30	83	5	Single species (rye)	40	0.36775
1	2017-01-30	83	5	Single species (rye)	60	0.381
1	2017-01-30	83	1	Control 1 - Fallow with herbicide control	10	0.104
1	2017-01-30	83	1	Control 1 - Fallow with herbicide control	20	0.26425
1	2017-01-30	83	1	Control 1 - Fallow with herbicide control	30	0.26325
1	2017-01-30	83	1	Control 1 - Fallow with herbicide control	40	0.2585
1	2017-01-30	83	1	Control 1 - Fallow with herbicide control	60	0.37075
1	2017-01-30	83	2	Control 1 - Fallow with herbicide control	10	0.107
1	2017-01-30	83	2	Control 1 - Fallow with herbicide control	20	0.2145
1	2017-01-30	83	2	Control 1 - Fallow with herbicide control	30	0.30775
1	2017-01-30	83	2	Control 1 - Fallow with herbicide control	40	0.32975
1	2017-01-30	83	2	Control 1 - Fallow with herbicide control	60	0.35475
1	2017-01-30	83	3	Control 1 - Fallow with herbicide control	10	0.0525
1	2017-01-30	83	3	Control 1 - Fallow with herbicide control	20	0.16525
1	2017-01-30	83	3	Control 1 - Fallow with herbicide control	30	0.29725
1	2017-01-30	83	3	Control 1 - Fallow with herbicide control	40	0.27975
1	2017-01-30	83	3	Control 1 - Fallow with herbicide control	60	0.345
1	2017-01-30	83	4	Control 1 - Fallow with herbicide control	10	0.04025
1	2017-01-30	83	4	Control 1 - Fallow with herbicide control	20	0.1325
1	2017-01-30	83	4	Control 1 - Fallow with herbicide control	30	0.27775
1	2017-01-30	83	4	Control 1 - Fallow with herbicide control	40	0.3815
1	2017-01-30	83	4	Control 1 - Fallow with herbicide control	60	0.398
1	2017-01-30	83	5	Control 1 - Fallow with herbicide control	10	0.0916
1	2017-01-30	83	5	Control 1 - Fallow with herbicide control	20	0.1228
1	2017-01-30	83	5	Control 1 - Fallow with herbicide control	30	0.3546
1	2017-01-30	83	5	Control 1 - Fallow with herbicide control	40	0.3226
1	2017-01-30	83	5	Control 1 - Fallow with herbicide control	60	0.3104
1	2017-01-30	83	1	Control 2 - Fallow without herbicide control	10	0.02875
1	2017-01-30	83	1	Control 2 - Fallow without herbicide control	20	0.1055
1	2017-01-30	83	1	Control 2 - Fallow without herbicide control	30	0.1365
1	2017-01-30	83	1	Control 2 - Fallow without herbicide control	40	0.2295
1	2017-01-30	83	1	Control 2 - Fallow without herbicide control	60	0.298
1	2017-01-30	83	2	Control 2 - Fallow without herbicide control	10	0.08825
1	2017-01-30	83	2	Control 2 - Fallow without herbicide control	20	0.31525
1	2017-01-30	83	2	Control 2 - Fallow without herbicide control	30	0.33875
1	2017-01-30	83	2	Control 2 - Fallow without herbicide control	40	0.3525
1	2017-01-30	83	2	Control 2 - Fallow without herbicide control	60	0.34375
1	2017-01-30	83	3	Control 2 - Fallow without herbicide control	10	0.14525
1	2017-01-30	83	3	Control 2 - Fallow without herbicide control	20	0.249
1	2017-01-30	83	3	Control 2 - Fallow without herbicide control	30	0.28275
1	2017-01-30	83	3	Control 2 - Fallow without herbicide control	40	0.3225
1	2017-01-30	83	3	Control 2 - Fallow without herbicide control	60	0.336
1	2017-01-30	83	5	Control 2 - Fallow without herbicide control	10	0.1485
1	2017-01-30	83	5	Control 2 - Fallow without herbicide control	20	0.28125
1	2017-01-30	83	5	Control 2 - Fallow without herbicide control	30	0.286
1	2017-01-30	83	5	Control 2 - Fallow without herbicide control	40	0.2775
1	2017-01-30	83	5	Control 2 - Fallow without herbicide control	60	0.2535
1	2017-02-13	97	1	Mixture of five (Austrian winter peas, rye, wheat, crimson clover, hairy vetch, and oats)	10	0.02675
1	2017-02-13	97	1	Mixture of five (Austrian winter peas, rye, wheat, crimson clover, hairy vetch, and oats)	20	0.07325
1	2017-02-13	97	1	Mixture of five (Austrian winter peas, rye, wheat, crimson clover, hairy vetch, and oats)	30	0.21275
1	2017-02-13	97	1	Mixture of five (Austrian winter peas, rye, wheat, crimson clover, hairy vetch, and oats)	40	0.29125
1	2017-02-13	97	1	Mixture of five (Austrian winter peas, rye, wheat, crimson clover, hairy vetch, and oats)	60	0.3425
1	2017-02-13	97	2	Mixture of five (Austrian winter peas, rye, wheat, crimson clover, hairy vetch, and oats)	10	0.06425
1	2017-02-13	97	2	Mixture of five (Austrian winter peas, rye, wheat, crimson clover, hairy vetch, and oats)	20	0.17875
1	2017-02-13	97	2	Mixture of five (Austrian winter peas, rye, wheat, crimson clover, hairy vetch, and oats)	30	0.289
1	2017-02-13	97	2	Mixture of five (Austrian winter peas, rye, wheat, crimson clover, hairy vetch, and oats)	40	0.29025
1	2017-02-13	97	2	Mixture of five (Austrian winter peas, rye, wheat, crimson clover, hairy vetch, and oats)	60	0.342
1	2017-02-13	97	3	Mixture of five (Austrian winter peas, rye, wheat, crimson clover, hairy vetch, and oats)	10	0.146
1	2017-02-13	97	3	Mixture of five (Austrian winter peas, rye, wheat, crimson clover, hairy vetch, and oats)	20	0.2825
1	2017-02-13	97	3	Mixture of five (Austrian winter peas, rye, wheat, crimson clover, hairy vetch, and oats)	30	0.319
1	2017-02-13	97	3	Mixture of five (Austrian winter peas, rye, wheat, crimson clover, hairy vetch, and oats)	40	0.337
1	2017-02-13	97	3	Mixture of five (Austrian winter peas, rye, wheat, crimson clover, hairy vetch, and oats)	60	0.36575
1	2017-02-13	97	4	Mixture of five (Austrian winter peas, rye, wheat, crimson clover, hairy vetch, and oats)	10	0.08625
1	2017-02-13	97	4	Mixture of five (Austrian winter peas, rye, wheat, crimson clover, hairy vetch, and oats)	20	0.17425
1	2017-02-13	97	4	Mixture of five (Austrian winter peas, rye, wheat, crimson clover, hairy vetch, and oats)	30	0.291
1	2017-02-13	97	4	Mixture of five (Austrian winter peas, rye, wheat, crimson clover, hairy vetch, and oats)	40	0.365
1	2017-02-13	97	4	Mixture of five (Austrian winter peas, rye, wheat, crimson clover, hairy vetch, and oats)	60	0.316
1	2017-02-13	97	5	Mixture of five (Austrian winter peas, rye, wheat, crimson clover, hairy vetch, and oats)	10	0.17
1	2017-02-13	97	5	Mixture of five (Austrian winter peas, rye, wheat, crimson clover, hairy vetch, and oats)	20	0.2695
1	2017-02-13	97	5	Mixture of five (Austrian winter peas, rye, wheat, crimson clover, hairy vetch, and oats)	30	0.337
1	2017-02-13	97	5	Mixture of five (Austrian winter peas, rye, wheat, crimson clover, hairy vetch, and oats)	40	0.3795
1	2017-02-13	97	5	Mixture of five (Austrian winter peas, rye, wheat, crimson clover, hairy vetch, and oats)	60	0.40425
1	2017-02-13	97	1	Mixture of five (oats, wheat, crimson clover, radish, and turnip)	10	0.047
1	2017-02-13	97	1	Mixture of five (oats, wheat, crimson clover, radish, and turnip)	20	0.1605
1	2017-02-13	97	1	Mixture of five (oats, wheat, crimson clover, radish, and turnip)	30	0.23025
1	2017-02-13	97	1	Mixture of five (oats, wheat, crimson clover, radish, and turnip)	40	0.31525
1	2017-02-13	97	1	Mixture of five (oats, wheat, crimson clover, radish, and turnip)	60	0.356
1	2017-02-13	97	2	Mixture of five (oats, wheat, crimson clover, radish, and turnip)	10	0.0685
1	2017-02-13	97	2	Mixture of five (oats, wheat, crimson clover, radish, and turnip)	20	0.154
1	2017-02-13	97	2	Mixture of five (oats, wheat, crimson clover, radish, and turnip)	30	0.30325
1	2017-02-13	97	2	Mixture of five (oats, wheat, crimson clover, radish, and turnip)	40	0.33875
1	2017-02-13	97	2	Mixture of five (oats, wheat, crimson clover, radish, and turnip)	60	0.36875
1	2017-02-13	97	3	Mixture of five (oats, wheat, crimson clover, radish, and turnip)	10	0.1335
1	2017-02-13	97	3	Mixture of five (oats, wheat, crimson clover, radish, and turnip)	20	0.21875
1	2017-02-13	97	3	Mixture of five (oats, wheat, crimson clover, radish, and turnip)	30	0.3025
1	2017-02-13	97	3	Mixture of five (oats, wheat, crimson clover, radish, and turnip)	40	0.31875
1	2017-02-13	97	3	Mixture of five (oats, wheat, crimson clover, radish, and turnip)	60	0.377
1	2017-02-13	97	4	Mixture of five (oats, wheat, crimson clover, radish, and turnip)	10	0.053
1	2017-02-13	97	4	Mixture of five (oats, wheat, crimson clover, radish, and turnip)	20	0.1955
1	2017-02-13	97	4	Mixture of five (oats, wheat, crimson clover, radish, and turnip)	30	0.36075
1	2017-02-13	97	4	Mixture of five (oats, wheat, crimson clover, radish, and turnip)	40	0.35225
1	2017-02-13	97	4	Mixture of five (oats, wheat, crimson clover, radish, and turnip)	60	0.37525
1	2017-02-13	97	5	Mixture of five (oats, wheat, crimson clover, radish, and turnip)	10	0.1385
1	2017-02-13	97	5	Mixture of five (oats, wheat, crimson clover, radish, and turnip)	20	0.25875
1	2017-02-13	97	5	Mixture of five (oats, wheat, crimson clover, radish, and turnip)	30	0.3135
1	2017-02-13	97	5	Mixture of five (oats, wheat, crimson clover, radish, and turnip)	40	0.3145
1	2017-02-13	97	5	Mixture of five (oats, wheat, crimson clover, radish, and turnip)	60	0.25775
1	2017-02-13	97	1	Mixture of two (crimson clover and rye)	10	0.02125
1	2017-02-13	97	1	Mixture of two (crimson clover and rye)	20	0.0775
1	2017-02-13	97	1	Mixture of two (crimson clover and rye)	30	0.1635
1	2017-02-13	97	1	Mixture of two (crimson clover and rye)	40	0.24325
1	2017-02-13	97	1	Mixture of two (crimson clover and rye)	60	0.2445
1	2017-02-13	97	2	Mixture of two (crimson clover and rye)	10	0.12825
1	2017-02-13	97	2	Mixture of two (crimson clover and rye)	20	0.2755
1	2017-02-13	97	2	Mixture of two (crimson clover and rye)	30	0.3195
1	2017-02-13	97	2	Mixture of two (crimson clover and rye)	40	0.33925
1	2017-02-13	97	2	Mixture of two (crimson clover and rye)	60	0.35325
1	2017-02-13	97	3	Mixture of two (crimson clover and rye)	10	0.065
1	2017-02-13	97	3	Mixture of two (crimson clover and rye)	20	0.11025
1	2017-02-13	97	3	Mixture of two (crimson clover and rye)	30	0.23775
1	2017-02-13	97	3	Mixture of two (crimson clover and rye)	40	0.3035
1	2017-02-13	97	3	Mixture of two (crimson clover and rye)	60	0.3665
1	2017-02-13	97	4	Mixture of two (crimson clover and rye)	10	0.08325
1	2017-02-13	97	4	Mixture of two (crimson clover and rye)	20	0.183
1	2017-02-13	97	4	Mixture of two (crimson clover and rye)	30	0.313
1	2017-02-13	97	4	Mixture of two (crimson clover and rye)	40	0.316
1	2017-02-13	97	4	Mixture of two (crimson clover and rye)	60	0.36675
1	2017-02-13	97	5	Mixture of two (crimson clover and rye)	10	0.15175
1	2017-02-13	97	5	Mixture of two (crimson clover and rye)	20	0.2935
1	2017-02-13	97	5	Mixture of two (crimson clover and rye)	30	0.26075
1	2017-02-13	97	5	Mixture of two (crimson clover and rye)	40	0.25625
1	2017-02-13	97	5	Mixture of two (crimson clover and rye)	60	0.36525
1	2017-02-13	97	1	Mixture of two (oat and radish)	10	0.038
1	2017-02-13	97	1	Mixture of two (oat and radish)	20	0.09175
1	2017-02-13	97	1	Mixture of two (oat and radish)	30	0.21275
1	2017-02-13	97	1	Mixture of two (oat and radish)	40	0.314
1	2017-02-13	97	1	Mixture of two (oat and radish)	60	0.33025
1	2017-02-13	97	2	Mixture of two (oat and radish)	10	0.1525
1	2017-02-13	97	2	Mixture of two (oat and radish)	20	0.26725
1	2017-02-13	97	2	Mixture of two (oat and radish)	30	0.30875
1	2017-02-13	97	2	Mixture of two (oat and radish)	40	0.328
1	2017-02-13	97	2	Mixture of two (oat and radish)	60	0.3635
1	2017-02-13	97	3	Mixture of two (oat and radish)	10	0.08325
1	2017-02-13	97	3	Mixture of two (oat and radish)	20	0.25125
1	2017-02-13	97	3	Mixture of two (oat and radish)	30	0.3555
1	2017-02-13	97	3	Mixture of two (oat and radish)	40	0.369
1	2017-02-13	97	3	Mixture of two (oat and radish)	60	0.35625
1	2017-02-13	97	4	Mixture of two (oat and radish)	10	0.065
1	2017-02-13	97	4	Mixture of two (oat and radish)	20	0.242
1	2017-02-13	97	4	Mixture of two (oat and radish)	30	0.34875
1	2017-02-13	97	4	Mixture of two (oat and radish)	40	0.3555
1	2017-02-13	97	4	Mixture of two (oat and radish)	60	0.33975
1	2017-02-13	97	5	Mixture of two (oat and radish)	10	0.14175
1	2017-02-13	97	5	Mixture of two (oat and radish)	20	0.3295
1	2017-02-13	97	5	Mixture of two (oat and radish)	30	0.339
1	2017-02-13	97	5	Mixture of two (oat and radish)	40	0.3495
1	2017-02-13	97	5	Mixture of two (oat and radish)	60	0.387
1	2017-02-13	97	1	Mixture of two (crimson clover and turnip)	10	0.02225
1	2017-02-13	97	1	Mixture of two (crimson clover and turnip)	20	0.0735
1	2017-02-13	97	1	Mixture of two (crimson clover and turnip)	30	0.194
1	2017-02-13	97	1	Mixture of two (crimson clover and turnip)	40	0.3005
1	2017-02-13	97	1	Mixture of two (crimson clover and turnip)	60	0.31775
1	2017-02-13	97	2	Mixture of two (crimson clover and turnip)	10	0.128
1	2017-02-13	97	2	Mixture of two (crimson clover and turnip)	20	0.27925
1	2017-02-13	97	2	Mixture of two (crimson clover and turnip)	30	0.307
1	2017-02-13	97	2	Mixture of two (crimson clover and turnip)	40	0.33925
1	2017-02-13	97	2	Mixture of two (crimson clover and turnip)	60	0.37725
1	2017-02-13	97	3	Mixture of two (crimson clover and turnip)	10	0.119
1	2017-02-13	97	3	Mixture of two (crimson clover and turnip)	20	0.292
1	2017-02-13	97	3	Mixture of two (crimson clover and turnip)	30	0.35475
1	2017-02-13	97	3	Mixture of two (crimson clover and turnip)	40	0.35575
1	2017-02-13	97	3	Mixture of two (crimson clover and turnip)	60	0.349
1	2017-02-13	97	5	Mixture of two (crimson clover and turnip)	10	0.17925
1	2017-02-13	97	5	Mixture of two (crimson clover and turnip)	20	0.308
1	2017-02-13	97	5	Mixture of two (crimson clover and turnip)	30	0.2905
1	2017-02-13	97	5	Mixture of two (crimson clover and turnip)	40	0.3205
1	2017-02-13	97	5	Mixture of two (crimson clover and turnip)	60	0.37125
1	2017-02-13	97	1	Single species (crimson clover)	10	0.0395
1	2017-02-13	97	1	Single species (crimson clover)	20	0.13275
1	2017-02-13	97	1	Single species (crimson clover)	30	0.28325
1	2017-02-13	97	1	Single species (crimson clover)	40	0.3455
1	2017-02-13	97	1	Single species (crimson clover)	60	0.33625
1	2017-02-13	97	2	Single species (crimson clover)	10	0.16325
1	2017-02-13	97	2	Single species (crimson clover)	20	0.22775
1	2017-02-13	97	2	Single species (crimson clover)	30	0.29075
1	2017-02-13	97	2	Single species (crimson clover)	40	0.341
1	2017-02-13	97	2	Single species (crimson clover)	60	0.38
1	2017-02-13	97	3	Single species (crimson clover)	10	0.144
1	2017-02-13	97	3	Single species (crimson clover)	20	0.27
1	2017-02-13	97	3	Single species (crimson clover)	30	0.31
1	2017-02-13	97	3	Single species (crimson clover)	40	0.3455
1	2017-02-13	97	3	Single species (crimson clover)	60	0.3885
1	2017-02-13	97	4	Single species (crimson clover)	10	0.02375
1	2017-02-13	97	4	Single species (crimson clover)	20	0.15425
1	2017-02-13	97	4	Single species (crimson clover)	30	0.359
1	2017-02-13	97	4	Single species (crimson clover)	40	0.371
1	2017-02-13	97	4	Single species (crimson clover)	60	0.372
1	2017-02-13	97	5	Single species (crimson clover)	10	0.05575
1	2017-02-13	97	5	Single species (crimson clover)	20	0.22175
1	2017-02-13	97	5	Single species (crimson clover)	30	0.36175
1	2017-02-13	97	5	Single species (crimson clover)	40	0.40175
1	2017-02-13	97	5	Single species (crimson clover)	60	0.41075
1	2017-02-13	97	1	Single species (rye)	10	0.14
1	2017-02-13	97	1	Single species (rye)	20	0.27025
1	2017-02-13	97	1	Single species (rye)	30	0.29825
1	2017-02-13	97	1	Single species (rye)	40	0.31275
1	2017-02-13	97	1	Single species (rye)	60	0.35325
1	2017-02-13	97	2	Single species (rye)	10	0.13125
1	2017-02-13	97	2	Single species (rye)	20	0.27725
1	2017-02-13	97	2	Single species (rye)	30	0.2955
1	2017-02-13	97	2	Single species (rye)	40	0.27825
1	2017-02-13	97	2	Single species (rye)	60	0.3575
1	2017-02-13	97	3	Single species (rye)	10	0.07
1	2017-02-13	97	3	Single species (rye)	20	0.27125
1	2017-02-13	97	3	Single species (rye)	30	0.3205
1	2017-02-13	97	3	Single species (rye)	40	0.35825
1	2017-02-13	97	3	Single species (rye)	60	0.37
1	2017-02-13	97	4	Single species (rye)	10	0.10925
1	2017-02-13	97	4	Single species (rye)	20	0.2665
1	2017-02-13	97	4	Single species (rye)	30	0.312
1	2017-02-13	97	4	Single species (rye)	40	0.3195
1	2017-02-13	97	4	Single species (rye)	60	0.35725
1	2017-02-13	97	5	Single species (rye)	10	0.16775
1	2017-02-13	97	5	Single species (rye)	20	0.3015
1	2017-02-13	97	5	Single species (rye)	30	0.325
1	2017-02-13	97	5	Single species (rye)	40	0.36275
1	2017-02-13	97	5	Single species (rye)	60	0.37375
1	2017-02-13	97	1	Control 1 - Fallow with herbicide control	10	0.10825
1	2017-02-13	97	1	Control 1 - Fallow with herbicide control	20	0.26325
1	2017-02-13	97	1	Control 1 - Fallow with herbicide control	30	0.263
1	2017-02-13	97	1	Control 1 - Fallow with herbicide control	40	0.2555
1	2017-02-13	97	1	Control 1 - Fallow with herbicide control	60	0.3655
1	2017-02-13	97	2	Control 1 - Fallow with herbicide control	10	0.13975
1	2017-02-13	97	2	Control 1 - Fallow with herbicide control	20	0.227
1	2017-02-13	97	2	Control 1 - Fallow with herbicide control	30	0.3065
1	2017-02-13	97	2	Control 1 - Fallow with herbicide control	40	0.332
1	2017-02-13	97	2	Control 1 - Fallow with herbicide control	60	0.36225
1	2017-02-13	97	3	Control 1 - Fallow with herbicide control	10	0.05925
1	2017-02-13	97	3	Control 1 - Fallow with herbicide control	20	0.17675
1	2017-02-13	97	3	Control 1 - Fallow with herbicide control	30	0.29925
1	2017-02-13	97	3	Control 1 - Fallow with herbicide control	40	0.2775
1	2017-02-13	97	3	Control 1 - Fallow with herbicide control	60	0.34625
1	2017-02-13	97	4	Control 1 - Fallow with herbicide control	10	0.04925
1	2017-02-13	97	4	Control 1 - Fallow with herbicide control	20	0.1375
1	2017-02-13	97	4	Control 1 - Fallow with herbicide control	30	0.28075
1	2017-02-13	97	4	Control 1 - Fallow with herbicide control	40	0.37725
1	2017-02-13	97	4	Control 1 - Fallow with herbicide control	60	0.399
1	2017-02-13	97	5	Control 1 - Fallow with herbicide control	10	0.09475
1	2017-02-13	97	5	Control 1 - Fallow with herbicide control	20	0.1215
1	2017-02-13	97	5	Control 1 - Fallow with herbicide control	30	0.3545
1	2017-02-13	97	5	Control 1 - Fallow with herbicide control	40	0.3265
1	2017-02-13	97	5	Control 1 - Fallow with herbicide control	60	0.31075
1	2017-02-13	97	1	Control 2 - Fallow without herbicide control	10	0.02725
1	2017-02-13	97	1	Control 2 - Fallow without herbicide control	20	0.10075
1	2017-02-13	97	1	Control 2 - Fallow without herbicide control	30	0.13675
1	2017-02-13	97	1	Control 2 - Fallow without herbicide control	40	0.2275
1	2017-02-13	97	1	Control 2 - Fallow without herbicide control	60	0.298
1	2017-02-13	97	2	Control 2 - Fallow without herbicide control	10	0.09675
1	2017-02-13	97	2	Control 2 - Fallow without herbicide control	20	0.3115
1	2017-02-13	97	2	Control 2 - Fallow without herbicide control	30	0.34025
1	2017-02-13	97	2	Control 2 - Fallow without herbicide control	40	0.35125
1	2017-02-13	97	2	Control 2 - Fallow without herbicide control	60	0.342
1	2017-02-13	97	3	Control 2 - Fallow without herbicide control	10	0.153
1	2017-02-13	97	3	Control 2 - Fallow without herbicide control	20	0.2555
1	2017-02-13	97	3	Control 2 - Fallow without herbicide control	30	0.28
1	2017-02-13	97	3	Control 2 - Fallow without herbicide control	40	0.32175
1	2017-02-13	97	3	Control 2 - Fallow without herbicide control	60	0.33525
1	2017-02-13	97	5	Control 2 - Fallow without herbicide control	10	0.1555
1	2017-02-13	97	5	Control 2 - Fallow without herbicide control	20	0.276
1	2017-02-13	97	5	Control 2 - Fallow without herbicide control	30	0.27975
1	2017-02-13	97	5	Control 2 - Fallow without herbicide control	40	0.2695
1	2017-02-13	97	5	Control 2 - Fallow without herbicide control	60	0.22475
1	2017-02-27	111	1	Mixture of five (Austrian winter peas, rye, wheat, crimson clover, hairy vetch, and oats)	10	0.02525
1	2017-02-27	111	1	Mixture of five (Austrian winter peas, rye, wheat, crimson clover, hairy vetch, and oats)	20	0.0705
1	2017-02-27	111	1	Mixture of five (Austrian winter peas, rye, wheat, crimson clover, hairy vetch, and oats)	30	0.19475
1	2017-02-27	111	1	Mixture of five (Austrian winter peas, rye, wheat, crimson clover, hairy vetch, and oats)	40	0.275
1	2017-02-27	111	1	Mixture of five (Austrian winter peas, rye, wheat, crimson clover, hairy vetch, and oats)	60	0.33775
1	2017-02-27	111	2	Mixture of five (Austrian winter peas, rye, wheat, crimson clover, hairy vetch, and oats)	10	0.0605
1	2017-02-27	111	2	Mixture of five (Austrian winter peas, rye, wheat, crimson clover, hairy vetch, and oats)	20	0.1645
1	2017-02-27	111	2	Mixture of five (Austrian winter peas, rye, wheat, crimson clover, hairy vetch, and oats)	30	0.2635
1	2017-02-27	111	2	Mixture of five (Austrian winter peas, rye, wheat, crimson clover, hairy vetch, and oats)	40	0.27075
1	2017-02-27	111	2	Mixture of five (Austrian winter peas, rye, wheat, crimson clover, hairy vetch, and oats)	60	0.333
1	2017-02-27	111	3	Mixture of five (Austrian winter peas, rye, wheat, crimson clover, hairy vetch, and oats)	10	0.1345
1	2017-02-27	111	3	Mixture of five (Austrian winter peas, rye, wheat, crimson clover, hairy vetch, and oats)	20	0.254
1	2017-02-27	111	3	Mixture of five (Austrian winter peas, rye, wheat, crimson clover, hairy vetch, and oats)	30	0.2975
1	2017-02-27	111	3	Mixture of five (Austrian winter peas, rye, wheat, crimson clover, hairy vetch, and oats)	40	0.327
1	2017-02-27	111	3	Mixture of five (Austrian winter peas, rye, wheat, crimson clover, hairy vetch, and oats)	60	0.3625
1	2017-02-27	111	4	Mixture of five (Austrian winter peas, rye, wheat, crimson clover, hairy vetch, and oats)	10	0.09025
1	2017-02-27	111	4	Mixture of five (Austrian winter peas, rye, wheat, crimson clover, hairy vetch, and oats)	20	0.1595
1	2017-02-27	111	4	Mixture of five (Austrian winter peas, rye, wheat, crimson clover, hairy vetch, and oats)	30	0.27175
1	2017-02-27	111	4	Mixture of five (Austrian winter peas, rye, wheat, crimson clover, hairy vetch, and oats)	40	0.352
1	2017-02-27	111	4	Mixture of five (Austrian winter peas, rye, wheat, crimson clover, hairy vetch, and oats)	60	0.3155
1	2017-02-27	111	5	Mixture of five (Austrian winter peas, rye, wheat, crimson clover, hairy vetch, and oats)	10	0.156
1	2017-02-27	111	5	Mixture of five (Austrian winter peas, rye, wheat, crimson clover, hairy vetch, and oats)	20	0.24975
1	2017-02-27	111	5	Mixture of five (Austrian winter peas, rye, wheat, crimson clover, hairy vetch, and oats)	30	0.322
1	2017-02-27	111	5	Mixture of five (Austrian winter peas, rye, wheat, crimson clover, hairy vetch, and oats)	40	0.36975
1	2017-02-27	111	5	Mixture of five (Austrian winter peas, rye, wheat, crimson clover, hairy vetch, and oats)	60	0.40275
1	2017-02-27	111	1	Mixture of five (oats, wheat, crimson clover, radish, and turnip)	10	0.065
1	2017-02-27	111	1	Mixture of five (oats, wheat, crimson clover, radish, and turnip)	20	0.17475
1	2017-02-27	111	1	Mixture of five (oats, wheat, crimson clover, radish, and turnip)	30	0.217
1	2017-02-27	111	1	Mixture of five (oats, wheat, crimson clover, radish, and turnip)	40	0.305
1	2017-02-27	111	1	Mixture of five (oats, wheat, crimson clover, radish, and turnip)	60	0.35425
1	2017-02-27	111	2	Mixture of five (oats, wheat, crimson clover, radish, and turnip)	10	0.07025
1	2017-02-27	111	2	Mixture of five (oats, wheat, crimson clover, radish, and turnip)	20	0.14175
1	2017-02-27	111	2	Mixture of five (oats, wheat, crimson clover, radish, and turnip)	30	0.27875
1	2017-02-27	111	2	Mixture of five (oats, wheat, crimson clover, radish, and turnip)	40	0.32175
1	2017-02-27	111	2	Mixture of five (oats, wheat, crimson clover, radish, and turnip)	60	0.35775
1	2017-02-27	111	3	Mixture of five (oats, wheat, crimson clover, radish, and turnip)	10	0.1305
1	2017-02-27	111	3	Mixture of five (oats, wheat, crimson clover, radish, and turnip)	20	0.207
1	2017-02-27	111	3	Mixture of five (oats, wheat, crimson clover, radish, and turnip)	30	0.28325
1	2017-02-27	111	3	Mixture of five (oats, wheat, crimson clover, radish, and turnip)	40	0.3045
1	2017-02-27	111	3	Mixture of five (oats, wheat, crimson clover, radish, and turnip)	60	0.3685
1	2017-02-27	111	4	Mixture of five (oats, wheat, crimson clover, radish, and turnip)	10	0.052
1	2017-02-27	111	4	Mixture of five (oats, wheat, crimson clover, radish, and turnip)	20	0.19
1	2017-02-27	111	4	Mixture of five (oats, wheat, crimson clover, radish, and turnip)	30	0.33625
1	2017-02-27	111	4	Mixture of five (oats, wheat, crimson clover, radish, and turnip)	40	0.359
1	2017-02-27	111	4	Mixture of five (oats, wheat, crimson clover, radish, and turnip)	60	0.38425
1	2017-02-27	111	5	Mixture of five (oats, wheat, crimson clover, radish, and turnip)	10	0.15225
1	2017-02-27	111	5	Mixture of five (oats, wheat, crimson clover, radish, and turnip)	20	0.24925
1	2017-02-27	111	5	Mixture of five (oats, wheat, crimson clover, radish, and turnip)	30	0.297
1	2017-02-27	111	5	Mixture of five (oats, wheat, crimson clover, radish, and turnip)	40	0.3105
1	2017-02-27	111	5	Mixture of five (oats, wheat, crimson clover, radish, and turnip)	60	0.25825
1	2017-02-27	111	1	Mixture of two (crimson clover and rye)	10	0.02175
1	2017-02-27	111	1	Mixture of two (crimson clover and rye)	20	0.07725
1	2017-02-27	111	1	Mixture of two (crimson clover and rye)	30	0.16875
1	2017-02-27	111	1	Mixture of two (crimson clover and rye)	40	0.24175
1	2017-02-27	111	1	Mixture of two (crimson clover and rye)	60	0.2445
1	2017-02-27	111	2	Mixture of two (crimson clover and rye)	10	0.135
1	2017-02-27	111	2	Mixture of two (crimson clover and rye)	20	0.27675
1	2017-02-27	111	2	Mixture of two (crimson clover and rye)	30	0.3085
1	2017-02-27	111	2	Mixture of two (crimson clover and rye)	40	0.32725
1	2017-02-27	111	2	Mixture of two (crimson clover and rye)	60	0.344
1	2017-02-27	111	3	Mixture of two (crimson clover and rye)	10	0.06475
1	2017-02-27	111	3	Mixture of two (crimson clover and rye)	20	0.103
1	2017-02-27	111	3	Mixture of two (crimson clover and rye)	30	0.22425
1	2017-02-27	111	3	Mixture of two (crimson clover and rye)	40	0.299
1	2017-02-27	111	3	Mixture of two (crimson clover and rye)	60	0.36575
1	2017-02-27	111	4	Mixture of two (crimson clover and rye)	10	0.0785
1	2017-02-27	111	4	Mixture of two (crimson clover and rye)	20	0.17375
1	2017-02-27	111	4	Mixture of two (crimson clover and rye)	30	0.2925
1	2017-02-27	111	4	Mixture of two (crimson clover and rye)	40	0.30125
1	2017-02-27	111	4	Mixture of two (crimson clover and rye)	60	0.36175
1	2017-02-27	111	5	Mixture of two (crimson clover and rye)	10	0.172
1	2017-02-27	111	5	Mixture of two (crimson clover and rye)	20	0.27925
1	2017-02-27	111	5	Mixture of two (crimson clover and rye)	30	0.25375
1	2017-02-27	111	5	Mixture of two (crimson clover and rye)	40	0.2485
1	2017-02-27	111	5	Mixture of two (crimson clover and rye)	60	0.36775
1	2017-02-27	111	1	Mixture of two (oat and radish)	10	0.03825
1	2017-02-27	111	1	Mixture of two (oat and radish)	20	0.08075
1	2017-02-27	111	1	Mixture of two (oat and radish)	30	0.19425
1	2017-02-27	111	1	Mixture of two (oat and radish)	40	0.3
1	2017-02-27	111	1	Mixture of two (oat and radish)	60	0.3215
1	2017-02-27	111	2	Mixture of two (oat and radish)	10	0.133
1	2017-02-27	111	2	Mixture of two (oat and radish)	20	0.228
1	2017-02-27	111	2	Mixture of two (oat and radish)	30	0.2855
1	2017-02-27	111	2	Mixture of two (oat and radish)	40	0.31025
1	2017-02-27	111	2	Mixture of two (oat and radish)	60	0.35
1	2017-02-27	111	3	Mixture of two (oat and radish)	10	0.075
1	2017-02-27	111	3	Mixture of two (oat and radish)	20	0.2205
1	2017-02-27	111	3	Mixture of two (oat and radish)	30	0.33825
1	2017-02-27	111	3	Mixture of two (oat and radish)	40	0.3655
1	2017-02-27	111	3	Mixture of two (oat and radish)	60	0.357
1	2017-02-27	111	4	Mixture of two (oat and radish)	10	0.0705
1	2017-02-27	111	4	Mixture of two (oat and radish)	20	0.22575
1	2017-02-27	111	4	Mixture of two (oat and radish)	30	0.33375
1	2017-02-27	111	4	Mixture of two (oat and radish)	40	0.3505
1	2017-02-27	111	4	Mixture of two (oat and radish)	60	0.34025
1	2017-02-27	111	5	Mixture of two (oat and radish)	10	0.1365
1	2017-02-27	111	5	Mixture of two (oat and radish)	20	0.312
1	2017-02-27	111	5	Mixture of two (oat and radish)	30	0.32725
1	2017-02-27	111	5	Mixture of two (oat and radish)	40	0.34825
1	2017-02-27	111	5	Mixture of two (oat and radish)	60	0.3965
1	2017-02-27	111	1	Mixture of two (crimson clover and turnip)	10	0.0175
1	2017-02-27	111	1	Mixture of two (crimson clover and turnip)	20	0.0715
1	2017-02-27	111	1	Mixture of two (crimson clover and turnip)	30	0.18225
1	2017-02-27	111	1	Mixture of two (crimson clover and turnip)	40	0.29275
1	2017-02-27	111	1	Mixture of two (crimson clover and turnip)	60	0.31025
1	2017-02-27	111	2	Mixture of two (crimson clover and turnip)	10	0.12775
1	2017-02-27	111	2	Mixture of two (crimson clover and turnip)	20	0.261
1	2017-02-27	111	2	Mixture of two (crimson clover and turnip)	30	0.29975
1	2017-02-27	111	2	Mixture of two (crimson clover and turnip)	40	0.32725
1	2017-02-27	111	2	Mixture of two (crimson clover and turnip)	60	0.3835
1	2017-02-27	111	3	Mixture of two (crimson clover and turnip)	10	0.11575
1	2017-02-27	111	3	Mixture of two (crimson clover and turnip)	20	0.27775
1	2017-02-27	111	3	Mixture of two (crimson clover and turnip)	30	0.34325
1	2017-02-27	111	3	Mixture of two (crimson clover and turnip)	40	0.34375
1	2017-02-27	111	3	Mixture of two (crimson clover and turnip)	60	0.35075
1	2017-02-27	111	5	Mixture of two (crimson clover and turnip)	10	0.16775
1	2017-02-27	111	5	Mixture of two (crimson clover and turnip)	20	0.30025
1	2017-02-27	111	5	Mixture of two (crimson clover and turnip)	30	0.27975
1	2017-02-27	111	5	Mixture of two (crimson clover and turnip)	40	0.3115
1	2017-02-27	111	5	Mixture of two (crimson clover and turnip)	60	0.36825
1	2017-02-27	111	1	Single species (crimson clover)	10	0.041
1	2017-02-27	111	1	Single species (crimson clover)	20	0.12375
1	2017-02-27	111	1	Single species (crimson clover)	30	0.274
1	2017-02-27	111	1	Single species (crimson clover)	40	0.3375
1	2017-02-27	111	1	Single species (crimson clover)	60	0.33575
1	2017-02-27	111	2	Single species (crimson clover)	10	0.15775
1	2017-02-27	111	2	Single species (crimson clover)	20	0.2355
1	2017-02-27	111	2	Single species (crimson clover)	30	0.28275
1	2017-02-27	111	2	Single species (crimson clover)	40	0.3315
1	2017-02-27	111	2	Single species (crimson clover)	60	0.377
1	2017-02-27	111	3	Single species (crimson clover)	10	0.12875
1	2017-02-27	111	3	Single species (crimson clover)	20	0.249
1	2017-02-27	111	3	Single species (crimson clover)	30	0.29525
1	2017-02-27	111	3	Single species (crimson clover)	40	0.3345
1	2017-02-27	111	3	Single species (crimson clover)	60	0.38175
1	2017-02-27	111	4	Single species (crimson clover)	10	0.01825
1	2017-02-27	111	4	Single species (crimson clover)	20	0.14525
1	2017-02-27	111	4	Single species (crimson clover)	30	0.3435
1	2017-02-27	111	4	Single species (crimson clover)	40	0.36625
1	2017-02-27	111	4	Single species (crimson clover)	60	0.37075
1	2017-02-27	111	5	Single species (crimson clover)	10	0.06175
1	2017-02-27	111	5	Single species (crimson clover)	20	0.21575
1	2017-02-27	111	5	Single species (crimson clover)	30	0.34725
1	2017-02-27	111	5	Single species (crimson clover)	40	0.39625
1	2017-02-27	111	5	Single species (crimson clover)	60	0.40175
1	2017-02-27	111	1	Single species (rye)	10	0.14475
1	2017-02-27	111	1	Single species (rye)	20	0.261
1	2017-02-27	111	1	Single species (rye)	30	0.28475
1	2017-02-27	111	1	Single species (rye)	40	0.299
1	2017-02-27	111	1	Single species (rye)	60	0.34325
1	2017-02-27	111	2	Single species (rye)	10	0.123
1	2017-02-27	111	2	Single species (rye)	20	0.214
1	2017-02-27	111	2	Single species (rye)	30	0.221
1	2017-02-27	111	2	Single species (rye)	40	0.201
1	2017-02-27	111	2	Single species (rye)	60	0.26075
1	2017-02-27	111	3	Single species (rye)	10	0.0645
1	2017-02-27	111	3	Single species (rye)	20	0.2525
1	2017-02-27	111	3	Single species (rye)	30	0.3045
1	2017-02-27	111	3	Single species (rye)	40	0.34325
1	2017-02-27	111	3	Single species (rye)	60	0.36425
1	2017-02-27	111	4	Single species (rye)	10	0.094
1	2017-02-27	111	4	Single species (rye)	20	0.2335
1	2017-02-27	111	4	Single species (rye)	30	0.29525
1	2017-02-27	111	4	Single species (rye)	40	0.28825
1	2017-02-27	111	4	Single species (rye)	60	0.2615
1	2017-02-27	111	5	Single species (rye)	10	0.14
1	2017-02-27	111	5	Single species (rye)	20	0.27225
1	2017-02-27	111	5	Single species (rye)	30	0.3085
1	2017-02-27	111	5	Single species (rye)	40	0.3515
1	2017-02-27	111	5	Single species (rye)	60	0.35825
1	2017-02-27	111	1	Control 1 - Fallow with herbicide control	10	0.10525
1	2017-02-27	111	1	Control 1 - Fallow with herbicide control	20	0.25875
1	2017-02-27	111	1	Control 1 - Fallow with herbicide control	30	0.2525
1	2017-02-27	111	1	Control 1 - Fallow with herbicide control	40	0.239
1	2017-02-27	111	1	Control 1 - Fallow with herbicide control	60	0.36275
1	2017-02-27	111	2	Control 1 - Fallow with herbicide control	10	0.16225
1	2017-02-27	111	2	Control 1 - Fallow with herbicide control	20	0.23475
1	2017-02-27	111	2	Control 1 - Fallow with herbicide control	30	0.3065
1	2017-02-27	111	2	Control 1 - Fallow with herbicide control	40	0.329
1	2017-02-27	111	2	Control 1 - Fallow with herbicide control	60	0.359
1	2017-02-27	111	3	Control 1 - Fallow with herbicide control	10	0.07
1	2017-02-27	111	3	Control 1 - Fallow with herbicide control	20	0.1685
1	2017-02-27	111	3	Control 1 - Fallow with herbicide control	30	0.2895
1	2017-02-27	111	3	Control 1 - Fallow with herbicide control	40	0.26875
1	2017-02-27	111	3	Control 1 - Fallow with herbicide control	60	0.34125
1	2017-02-27	111	4	Control 1 - Fallow with herbicide control	10	0.0535
1	2017-02-27	111	4	Control 1 - Fallow with herbicide control	20	0.14425
1	2017-02-27	111	4	Control 1 - Fallow with herbicide control	30	0.284
1	2017-02-27	111	4	Control 1 - Fallow with herbicide control	40	0.37475
1	2017-02-27	111	4	Control 1 - Fallow with herbicide control	60	0.394
1	2017-02-27	111	5	Control 1 - Fallow with herbicide control	10	0.09925
1	2017-02-27	111	5	Control 1 - Fallow with herbicide control	20	0.12075
1	2017-02-27	111	5	Control 1 - Fallow with herbicide control	30	0.34225
1	2017-02-27	111	5	Control 1 - Fallow with herbicide control	40	0.3315
1	2017-02-27	111	5	Control 1 - Fallow with herbicide control	60	0.27775
1	2017-02-27	111	1	Control 2 - Fallow without herbicide control	10	0.03025
1	2017-02-27	111	1	Control 2 - Fallow without herbicide control	20	0.09675
1	2017-02-27	111	1	Control 2 - Fallow without herbicide control	30	0.13
1	2017-02-27	111	1	Control 2 - Fallow without herbicide control	40	0.2185
1	2017-02-27	111	1	Control 2 - Fallow without herbicide control	60	0.29575
1	2017-02-27	111	2	Control 2 - Fallow without herbicide control	10	0.0955
1	2017-02-27	111	2	Control 2 - Fallow without herbicide control	20	0.30025
1	2017-02-27	111	2	Control 2 - Fallow without herbicide control	30	0.3325
1	2017-02-27	111	2	Control 2 - Fallow without herbicide control	40	0.3435
1	2017-02-27	111	2	Control 2 - Fallow without herbicide control	60	0.3385
1	2017-02-27	111	3	Control 2 - Fallow without herbicide control	10	0.149
1	2017-02-27	111	3	Control 2 - Fallow without herbicide control	20	0.23625
1	2017-02-27	111	3	Control 2 - Fallow without herbicide control	30	0.267
1	2017-02-27	111	3	Control 2 - Fallow without herbicide control	40	0.31075
1	2017-02-27	111	3	Control 2 - Fallow without herbicide control	60	0.33
1	2017-02-27	111	5	Control 2 - Fallow without herbicide control	10	0.143
1	2017-02-27	111	5	Control 2 - Fallow without herbicide control	20	0.266
1	2017-02-27	111	5	Control 2 - Fallow without herbicide control	30	0.267
1	2017-02-27	111	5	Control 2 - Fallow without herbicide control	40	0.2615
1	2017-02-27	111	5	Control 2 - Fallow without herbicide control	60	0.2315
1	2017-03-18	130	1	Mixture of five (Austrian winter peas, rye, wheat, crimson clover, hairy vetch, and oats)	10	0.0325
1	2017-03-18	130	1	Mixture of five (Austrian winter peas, rye, wheat, crimson clover, hairy vetch, and oats)	20	0.071
1	2017-03-18	130	1	Mixture of five (Austrian winter peas, rye, wheat, crimson clover, hairy vetch, and oats)	30	0.19225
1	2017-03-18	130	1	Mixture of five (Austrian winter peas, rye, wheat, crimson clover, hairy vetch, and oats)	40	0.26375
1	2017-03-18	130	1	Mixture of five (Austrian winter peas, rye, wheat, crimson clover, hairy vetch, and oats)	60	0.327
1	2017-03-18	130	2	Mixture of five (Austrian winter peas, rye, wheat, crimson clover, hairy vetch, and oats)	10	0.06425
1	2017-03-18	130	2	Mixture of five (Austrian winter peas, rye, wheat, crimson clover, hairy vetch, and oats)	20	0.1655
1	2017-03-18	130	2	Mixture of five (Austrian winter peas, rye, wheat, crimson clover, hairy vetch, and oats)	30	0.2455
1	2017-03-18	130	2	Mixture of five (Austrian winter peas, rye, wheat, crimson clover, hairy vetch, and oats)	40	0.25225
1	2017-03-18	130	2	Mixture of five (Austrian winter peas, rye, wheat, crimson clover, hairy vetch, and oats)	60	0.32575
1	2017-03-18	130	3	Mixture of five (Austrian winter peas, rye, wheat, crimson clover, hairy vetch, and oats)	10	0.143
1	2017-03-18	130	3	Mixture of five (Austrian winter peas, rye, wheat, crimson clover, hairy vetch, and oats)	20	0.257
1	2017-03-18	130	3	Mixture of five (Austrian winter peas, rye, wheat, crimson clover, hairy vetch, and oats)	30	0.292
1	2017-03-18	130	3	Mixture of five (Austrian winter peas, rye, wheat, crimson clover, hairy vetch, and oats)	40	0.31075
1	2017-03-18	130	3	Mixture of five (Austrian winter peas, rye, wheat, crimson clover, hairy vetch, and oats)	60	0.35575
1	2017-03-18	130	4	Mixture of five (Austrian winter peas, rye, wheat, crimson clover, hairy vetch, and oats)	10	0.1125
1	2017-03-18	130	4	Mixture of five (Austrian winter peas, rye, wheat, crimson clover, hairy vetch, and oats)	20	0.16575
1	2017-03-18	130	4	Mixture of five (Austrian winter peas, rye, wheat, crimson clover, hairy vetch, and oats)	30	0.2615
1	2017-03-18	130	4	Mixture of five (Austrian winter peas, rye, wheat, crimson clover, hairy vetch, and oats)	40	0.33375
1	2017-03-18	130	4	Mixture of five (Austrian winter peas, rye, wheat, crimson clover, hairy vetch, and oats)	60	0.31125
1	2017-03-18	130	5	Mixture of five (Austrian winter peas, rye, wheat, crimson clover, hairy vetch, and oats)	10	0.16275
1	2017-03-18	130	5	Mixture of five (Austrian winter peas, rye, wheat, crimson clover, hairy vetch, and oats)	20	0.243
1	2017-03-18	130	5	Mixture of five (Austrian winter peas, rye, wheat, crimson clover, hairy vetch, and oats)	30	0.315
1	2017-03-18	130	5	Mixture of five (Austrian winter peas, rye, wheat, crimson clover, hairy vetch, and oats)	40	0.3615
1	2017-03-18	130	5	Mixture of five (Austrian winter peas, rye, wheat, crimson clover, hairy vetch, and oats)	60	0.396
1	2017-03-18	130	1	Mixture of five (oats, wheat, crimson clover, radish, and turnip)	10	0.08825
1	2017-03-18	130	1	Mixture of five (oats, wheat, crimson clover, radish, and turnip)	20	0.186
1	2017-03-18	130	1	Mixture of five (oats, wheat, crimson clover, radish, and turnip)	30	0.2225
1	2017-03-18	130	1	Mixture of five (oats, wheat, crimson clover, radish, and turnip)	40	0.30125
1	2017-03-18	130	1	Mixture of five (oats, wheat, crimson clover, radish, and turnip)	60	0.3495
1	2017-03-18	130	2	Mixture of five (oats, wheat, crimson clover, radish, and turnip)	10	0.126
1	2017-03-18	130	2	Mixture of five (oats, wheat, crimson clover, radish, and turnip)	20	0.15525
1	2017-03-18	130	2	Mixture of five (oats, wheat, crimson clover, radish, and turnip)	30	0.2865
1	2017-03-18	130	2	Mixture of five (oats, wheat, crimson clover, radish, and turnip)	40	0.32425
1	2017-03-18	130	2	Mixture of five (oats, wheat, crimson clover, radish, and turnip)	60	0.36125
1	2017-03-18	130	3	Mixture of five (oats, wheat, crimson clover, radish, and turnip)	10	0.1335
1	2017-03-18	130	3	Mixture of five (oats, wheat, crimson clover, radish, and turnip)	20	0.2085
1	2017-03-18	130	3	Mixture of five (oats, wheat, crimson clover, radish, and turnip)	30	0.283
1	2017-03-18	130	3	Mixture of five (oats, wheat, crimson clover, radish, and turnip)	40	0.29525
1	2017-03-18	130	3	Mixture of five (oats, wheat, crimson clover, radish, and turnip)	60	0.36575
1	2017-03-18	130	4	Mixture of five (oats, wheat, crimson clover, radish, and turnip)	10	0.05775
1	2017-03-18	130	4	Mixture of five (oats, wheat, crimson clover, radish, and turnip)	20	0.194
1	2017-03-18	130	4	Mixture of five (oats, wheat, crimson clover, radish, and turnip)	30	0.33175
1	2017-03-18	130	4	Mixture of five (oats, wheat, crimson clover, radish, and turnip)	40	0.35025
1	2017-03-18	130	4	Mixture of five (oats, wheat, crimson clover, radish, and turnip)	60	0.37725
1	2017-03-18	130	5	Mixture of five (oats, wheat, crimson clover, radish, and turnip)	10	0.1545
1	2017-03-18	130	5	Mixture of five (oats, wheat, crimson clover, radish, and turnip)	20	0.262
1	2017-03-18	130	5	Mixture of five (oats, wheat, crimson clover, radish, and turnip)	30	0.30325
1	2017-03-18	130	5	Mixture of five (oats, wheat, crimson clover, radish, and turnip)	40	0.31275
1	2017-03-18	130	5	Mixture of five (oats, wheat, crimson clover, radish, and turnip)	60	0.29125
1	2017-03-18	130	1	Mixture of two (crimson clover and rye)	10	0.0225
1	2017-03-18	130	1	Mixture of two (crimson clover and rye)	20	0.08025
1	2017-03-18	130	1	Mixture of two (crimson clover and rye)	30	0.172
1	2017-03-18	130	1	Mixture of two (crimson clover and rye)	40	0.23275
1	2017-03-18	130	1	Mixture of two (crimson clover and rye)	60	0.2495
1	2017-03-18	130	2	Mixture of two (crimson clover and rye)	10	0.14325
1	2017-03-18	130	2	Mixture of two (crimson clover and rye)	20	0.27075
1	2017-03-18	130	2	Mixture of two (crimson clover and rye)	30	0.31275
1	2017-03-18	130	2	Mixture of two (crimson clover and rye)	40	0.32725
1	2017-03-18	130	2	Mixture of two (crimson clover and rye)	60	0.34125
1	2017-03-18	130	3	Mixture of two (crimson clover and rye)	10	0.064
1	2017-03-18	130	3	Mixture of two (crimson clover and rye)	20	0.10775
1	2017-03-18	130	3	Mixture of two (crimson clover and rye)	30	0.21775
1	2017-03-18	130	3	Mixture of two (crimson clover and rye)	40	0.287
1	2017-03-18	130	3	Mixture of two (crimson clover and rye)	60	0.35625
1	2017-03-18	130	4	Mixture of two (crimson clover and rye)	10	0.08525
1	2017-03-18	130	4	Mixture of two (crimson clover and rye)	20	0.1715
1	2017-03-18	130	4	Mixture of two (crimson clover and rye)	30	0.27825
1	2017-03-18	130	4	Mixture of two (crimson clover and rye)	40	0.28475
1	2017-03-18	130	4	Mixture of two (crimson clover and rye)	60	0.37075
1	2017-03-18	130	5	Mixture of two (crimson clover and rye)	10	0.17825
1	2017-03-18	130	5	Mixture of two (crimson clover and rye)	20	0.2745
1	2017-03-18	130	5	Mixture of two (crimson clover and rye)	30	0.246
1	2017-03-18	130	5	Mixture of two (crimson clover and rye)	40	0.23775
1	2017-03-18	130	5	Mixture of two (crimson clover and rye)	60	0.365
1	2017-03-18	130	1	Mixture of two (oat and radish)	10	0.038
1	2017-03-18	130	1	Mixture of two (oat and radish)	20	0.08375
1	2017-03-18	130	1	Mixture of two (oat and radish)	30	0.19175
1	2017-03-18	130	1	Mixture of two (oat and radish)	40	0.289
1	2017-03-18	130	1	Mixture of two (oat and radish)	60	0.31675
1	2017-03-18	130	2	Mixture of two (oat and radish)	10	0.14475
1	2017-03-18	130	2	Mixture of two (oat and radish)	20	0.2265
1	2017-03-18	130	2	Mixture of two (oat and radish)	30	0.27525
1	2017-03-18	130	2	Mixture of two (oat and radish)	40	0.294
1	2017-03-18	130	2	Mixture of two (oat and radish)	60	0.343
1	2017-03-18	130	3	Mixture of two (oat and radish)	10	0.083
1	2017-03-18	130	3	Mixture of two (oat and radish)	20	0.2235
1	2017-03-18	130	3	Mixture of two (oat and radish)	30	0.33675
1	2017-03-18	130	3	Mixture of two (oat and radish)	40	0.35425
1	2017-03-18	130	3	Mixture of two (oat and radish)	60	0.35475
1	2017-03-18	130	4	Mixture of two (oat and radish)	10	0.073
1	2017-03-18	130	4	Mixture of two (oat and radish)	20	0.22975
1	2017-03-18	130	4	Mixture of two (oat and radish)	30	0.33075
1	2017-03-18	130	4	Mixture of two (oat and radish)	40	0.339
1	2017-03-18	130	4	Mixture of two (oat and radish)	60	0.33425
1	2017-03-18	130	5	Mixture of two (oat and radish)	10	0.1315
1	2017-03-18	130	5	Mixture of two (oat and radish)	20	0.3065
1	2017-03-18	130	5	Mixture of two (oat and radish)	30	0.325
1	2017-03-18	130	5	Mixture of two (oat and radish)	40	0.34025
1	2017-03-18	130	5	Mixture of two (oat and radish)	60	0.391
1	2017-03-18	130	1	Mixture of two (crimson clover and turnip)	10	0.0165
1	2017-03-18	130	1	Mixture of two (crimson clover and turnip)	20	0.07175
1	2017-03-18	130	1	Mixture of two (crimson clover and turnip)	30	0.17675
1	2017-03-18	130	1	Mixture of two (crimson clover and turnip)	40	0.2775
1	2017-03-18	130	1	Mixture of two (crimson clover and turnip)	60	0.3045
1	2017-03-18	130	2	Mixture of two (crimson clover and turnip)	10	0.1315
1	2017-03-18	130	2	Mixture of two (crimson clover and turnip)	20	0.25625
1	2017-03-18	130	2	Mixture of two (crimson clover and turnip)	30	0.29675
1	2017-03-18	130	2	Mixture of two (crimson clover and turnip)	40	0.32175
1	2017-03-18	130	2	Mixture of two (crimson clover and turnip)	60	0.3795
1	2017-03-18	130	3	Mixture of two (crimson clover and turnip)	10	0.11775
1	2017-03-18	130	3	Mixture of two (crimson clover and turnip)	20	0.28025
1	2017-03-18	130	3	Mixture of two (crimson clover and turnip)	30	0.3415
1	2017-03-18	130	3	Mixture of two (crimson clover and turnip)	40	0.33675
1	2017-03-18	130	3	Mixture of two (crimson clover and turnip)	60	0.33925
1	2017-03-18	130	5	Mixture of two (crimson clover and turnip)	10	0.1835
1	2017-03-18	130	5	Mixture of two (crimson clover and turnip)	20	0.3045
1	2017-03-18	130	5	Mixture of two (crimson clover and turnip)	30	0.281
1	2017-03-18	130	5	Mixture of two (crimson clover and turnip)	40	0.305
1	2017-03-18	130	5	Mixture of two (crimson clover and turnip)	60	0.366
1	2017-03-18	130	1	Single species (crimson clover)	10	0.04375
1	2017-03-18	130	1	Single species (crimson clover)	20	0.13125
1	2017-03-18	130	1	Single species (crimson clover)	30	0.2755
1	2017-03-18	130	1	Single species (crimson clover)	40	0.331
1	2017-03-18	130	1	Single species (crimson clover)	60	0.3295
1	2017-03-18	130	2	Single species (crimson clover)	10	0.1675
1	2017-03-18	130	2	Single species (crimson clover)	20	0.231
1	2017-03-18	130	2	Single species (crimson clover)	30	0.27675
1	2017-03-18	130	2	Single species (crimson clover)	40	0.31925
1	2017-03-18	130	2	Single species (crimson clover)	60	0.373
1	2017-03-18	130	3	Single species (crimson clover)	10	0.145
1	2017-03-18	130	3	Single species (crimson clover)	20	0.24475
1	2017-03-18	130	3	Single species (crimson clover)	30	0.29
1	2017-03-18	130	3	Single species (crimson clover)	40	0.3235
1	2017-03-18	130	3	Single species (crimson clover)	60	0.37425
1	2017-03-18	130	4	Single species (crimson clover)	10	0.02425
1	2017-03-18	130	4	Single species (crimson clover)	20	0.15625
1	2017-03-18	130	4	Single species (crimson clover)	30	0.33875
1	2017-03-18	130	4	Single species (crimson clover)	40	0.35875
1	2017-03-18	130	4	Single species (crimson clover)	60	0.368
1	2017-03-18	130	5	Single species (crimson clover)	10	0.07025
1	2017-03-18	130	5	Single species (crimson clover)	20	0.216
1	2017-03-18	130	5	Single species (crimson clover)	30	0.34875
1	2017-03-18	130	5	Single species (crimson clover)	40	0.38175
1	2017-03-18	130	5	Single species (crimson clover)	60	0.39675
1	2017-03-18	130	1	Single species (rye)	10	0.1495
1	2017-03-18	130	1	Single species (rye)	20	0.26875
1	2017-03-18	130	1	Single species (rye)	30	0.29
1	2017-03-18	130	1	Single species (rye)	40	0.29525
1	2017-03-18	130	1	Single species (rye)	60	0.34075
1	2017-03-18	130	2	Single species (rye)	10	0.13675
1	2017-03-18	130	2	Single species (rye)	20	0.268
1	2017-03-18	130	2	Single species (rye)	30	0.28175
1	2017-03-18	130	2	Single species (rye)	40	0.25825
1	2017-03-18	130	2	Single species (rye)	60	0.34775
1	2017-03-18	130	3	Single species (rye)	10	0.069
1	2017-03-18	130	3	Single species (rye)	20	0.258
1	2017-03-18	130	3	Single species (rye)	30	0.296
1	2017-03-18	130	3	Single species (rye)	40	0.33075
1	2017-03-18	130	3	Single species (rye)	60	0.3615
1	2017-03-18	130	4	Single species (rye)	10	0.097
1	2017-03-18	130	4	Single species (rye)	20	0.242
1	2017-03-18	130	4	Single species (rye)	30	0.2855
1	2017-03-18	130	4	Single species (rye)	40	0.29625
1	2017-03-18	130	4	Single species (rye)	60	0.3415
1	2017-03-18	130	5	Single species (rye)	10	0.15425
1	2017-03-18	130	5	Single species (rye)	20	0.2705
1	2017-03-18	130	5	Single species (rye)	30	0.29975
1	2017-03-18	130	5	Single species (rye)	40	0.33725
1	2017-03-18	130	5	Single species (rye)	60	0.3495
1	2017-03-18	130	1	Control 1 - Fallow with herbicide control	10	0.10325
1	2017-03-18	130	1	Control 1 - Fallow with herbicide control	20	0.2585
1	2017-03-18	130	1	Control 1 - Fallow with herbicide control	30	0.259
1	2017-03-18	130	1	Control 1 - Fallow with herbicide control	40	0.2495
1	2017-03-18	130	1	Control 1 - Fallow with herbicide control	60	0.36025
1	2017-03-18	130	2	Control 1 - Fallow with herbicide control	10	0.17275
1	2017-03-18	130	2	Control 1 - Fallow with herbicide control	20	0.23225
1	2017-03-18	130	2	Control 1 - Fallow with herbicide control	30	0.30675
1	2017-03-18	130	2	Control 1 - Fallow with herbicide control	40	0.325
1	2017-03-18	130	2	Control 1 - Fallow with herbicide control	60	0.36025
1	2017-03-18	130	3	Control 1 - Fallow with herbicide control	10	0.07225
1	2017-03-18	130	3	Control 1 - Fallow with herbicide control	20	0.171
1	2017-03-18	130	3	Control 1 - Fallow with herbicide control	30	0.29625
1	2017-03-18	130	3	Control 1 - Fallow with herbicide control	40	0.2715
1	2017-03-18	130	3	Control 1 - Fallow with herbicide control	60	0.33975
1	2017-03-18	130	4	Control 1 - Fallow with herbicide control	10	0.05475
1	2017-03-18	130	4	Control 1 - Fallow with herbicide control	20	0.1405
1	2017-03-18	130	4	Control 1 - Fallow with herbicide control	30	0.28125
1	2017-03-18	130	4	Control 1 - Fallow with herbicide control	40	0.37
1	2017-03-18	130	4	Control 1 - Fallow with herbicide control	60	0.39375
1	2017-03-18	130	5	Control 1 - Fallow with herbicide control	10	0.095
1	2017-03-18	130	5	Control 1 - Fallow with herbicide control	20	0.1215
1	2017-03-18	130	5	Control 1 - Fallow with herbicide control	30	0.356
1	2017-03-18	130	5	Control 1 - Fallow with herbicide control	40	0.313
1	2017-03-18	130	5	Control 1 - Fallow with herbicide control	60	0.30625
1	2017-03-18	130	1	Control 2 - Fallow without herbicide control	10	0.027
1	2017-03-18	130	1	Control 2 - Fallow without herbicide control	20	0.10275
1	2017-03-18	130	1	Control 2 - Fallow without herbicide control	30	0.13225
1	2017-03-18	130	1	Control 2 - Fallow without herbicide control	40	0.215
1	2017-03-18	130	1	Control 2 - Fallow without herbicide control	60	0.294
1	2017-03-18	130	2	Control 2 - Fallow without herbicide control	10	0.11
1	2017-03-18	130	2	Control 2 - Fallow without herbicide control	20	0.30225
1	2017-03-18	130	2	Control 2 - Fallow without herbicide control	30	0.334
1	2017-03-18	130	2	Control 2 - Fallow without herbicide control	40	0.33425
1	2017-03-18	130	2	Control 2 - Fallow without herbicide control	60	0.3405
1	2017-03-18	130	3	Control 2 - Fallow without herbicide control	10	0.1645
1	2017-03-18	130	3	Control 2 - Fallow without herbicide control	20	0.24275
1	2017-03-18	130	3	Control 2 - Fallow without herbicide control	30	0.264
1	2017-03-18	130	3	Control 2 - Fallow without herbicide control	40	0.301
1	2017-03-18	130	3	Control 2 - Fallow without herbicide control	60	0.32475
1	2017-03-18	130	5	Control 2 - Fallow without herbicide control	10	0.1615
1	2017-03-18	130	5	Control 2 - Fallow without herbicide control	20	0.26425
1	2017-03-18	130	5	Control 2 - Fallow without herbicide control	30	0.26575
1	2017-03-18	130	5	Control 2 - Fallow without herbicide control	40	0.25425
1	2017-03-18	130	5	Control 2 - Fallow without herbicide control	60	0.2315
1	2017-03-25	137	1	Mixture of five (Austrian winter peas, rye, wheat, crimson clover, hairy vetch, and oats)	10	0.0435
1	2017-03-25	137	1	Mixture of five (Austrian winter peas, rye, wheat, crimson clover, hairy vetch, and oats)	20	0.0715
1	2017-03-25	137	1	Mixture of five (Austrian winter peas, rye, wheat, crimson clover, hairy vetch, and oats)	30	0.1895
1	2017-03-25	137	1	Mixture of five (Austrian winter peas, rye, wheat, crimson clover, hairy vetch, and oats)	40	0.254
1	2017-03-25	137	1	Mixture of five (Austrian winter peas, rye, wheat, crimson clover, hairy vetch, and oats)	60	0.32425
1	2017-03-25	137	2	Mixture of five (Austrian winter peas, rye, wheat, crimson clover, hairy vetch, and oats)	10	0.04175
1	2017-03-25	137	2	Mixture of five (Austrian winter peas, rye, wheat, crimson clover, hairy vetch, and oats)	20	0.17
1	2017-03-25	137	2	Mixture of five (Austrian winter peas, rye, wheat, crimson clover, hairy vetch, and oats)	30	0.238
1	2017-03-25	137	2	Mixture of five (Austrian winter peas, rye, wheat, crimson clover, hairy vetch, and oats)	40	0.2435
1	2017-03-25	137	2	Mixture of five (Austrian winter peas, rye, wheat, crimson clover, hairy vetch, and oats)	60	0.31625
1	2017-03-25	137	3	Mixture of five (Austrian winter peas, rye, wheat, crimson clover, hairy vetch, and oats)	10	0.13375
1	2017-03-25	137	3	Mixture of five (Austrian winter peas, rye, wheat, crimson clover, hairy vetch, and oats)	20	0.22475
1	2017-03-25	137	3	Mixture of five (Austrian winter peas, rye, wheat, crimson clover, hairy vetch, and oats)	30	0.28875
1	2017-03-25	137	3	Mixture of five (Austrian winter peas, rye, wheat, crimson clover, hairy vetch, and oats)	40	0.30675
1	2017-03-25	137	3	Mixture of five (Austrian winter peas, rye, wheat, crimson clover, hairy vetch, and oats)	60	0.35525
1	2017-03-25	137	4	Mixture of five (Austrian winter peas, rye, wheat, crimson clover, hairy vetch, and oats)	10	0.10775
1	2017-03-25	137	4	Mixture of five (Austrian winter peas, rye, wheat, crimson clover, hairy vetch, and oats)	20	0.1295
1	2017-03-25	137	4	Mixture of five (Austrian winter peas, rye, wheat, crimson clover, hairy vetch, and oats)	30	0.224
1	2017-03-25	137	4	Mixture of five (Austrian winter peas, rye, wheat, crimson clover, hairy vetch, and oats)	40	0.327
1	2017-03-25	137	4	Mixture of five (Austrian winter peas, rye, wheat, crimson clover, hairy vetch, and oats)	60	0.30725
1	2017-03-25	137	5	Mixture of five (Austrian winter peas, rye, wheat, crimson clover, hairy vetch, and oats)	10	0.15675
1	2017-03-25	137	5	Mixture of five (Austrian winter peas, rye, wheat, crimson clover, hairy vetch, and oats)	20	0.23425
1	2017-03-25	137	5	Mixture of five (Austrian winter peas, rye, wheat, crimson clover, hairy vetch, and oats)	30	0.31125
1	2017-03-25	137	5	Mixture of five (Austrian winter peas, rye, wheat, crimson clover, hairy vetch, and oats)	40	0.3605
1	2017-03-25	137	5	Mixture of five (Austrian winter peas, rye, wheat, crimson clover, hairy vetch, and oats)	60	0.4005
1	2017-03-25	137	1	Mixture of five (oats, wheat, crimson clover, radish, and turnip)	10	0.07625
1	2017-03-25	137	1	Mixture of five (oats, wheat, crimson clover, radish, and turnip)	20	0.1695
1	2017-03-25	137	1	Mixture of five (oats, wheat, crimson clover, radish, and turnip)	30	0.216
1	2017-03-25	137	1	Mixture of five (oats, wheat, crimson clover, radish, and turnip)	40	0.29175
1	2017-03-25	137	1	Mixture of five (oats, wheat, crimson clover, radish, and turnip)	60	0.34525
1	2017-03-25	137	2	Mixture of five (oats, wheat, crimson clover, radish, and turnip)	10	0.13425
1	2017-03-25	137	2	Mixture of five (oats, wheat, crimson clover, radish, and turnip)	20	0.1415
1	2017-03-25	137	2	Mixture of five (oats, wheat, crimson clover, radish, and turnip)	30	0.29075
1	2017-03-25	137	2	Mixture of five (oats, wheat, crimson clover, radish, and turnip)	40	0.3155
1	2017-03-25	137	2	Mixture of five (oats, wheat, crimson clover, radish, and turnip)	60	0.3595
1	2017-03-25	137	3	Mixture of five (oats, wheat, crimson clover, radish, and turnip)	10	0.12
1	2017-03-25	137	3	Mixture of five (oats, wheat, crimson clover, radish, and turnip)	20	0.11075
1	2017-03-25	137	3	Mixture of five (oats, wheat, crimson clover, radish, and turnip)	30	0.25475
1	2017-03-25	137	3	Mixture of five (oats, wheat, crimson clover, radish, and turnip)	40	0.29125
1	2017-03-25	137	3	Mixture of five (oats, wheat, crimson clover, radish, and turnip)	60	0.36825
1	2017-03-25	137	4	Mixture of five (oats, wheat, crimson clover, radish, and turnip)	10	0.0465
1	2017-03-25	137	4	Mixture of five (oats, wheat, crimson clover, radish, and turnip)	20	0.18725
1	2017-03-25	137	4	Mixture of five (oats, wheat, crimson clover, radish, and turnip)	30	0.3305
1	2017-03-25	137	4	Mixture of five (oats, wheat, crimson clover, radish, and turnip)	40	0.34675
1	2017-03-25	137	4	Mixture of five (oats, wheat, crimson clover, radish, and turnip)	60	0.379
1	2017-03-25	137	5	Mixture of five (oats, wheat, crimson clover, radish, and turnip)	10	0.149
1	2017-03-25	137	5	Mixture of five (oats, wheat, crimson clover, radish, and turnip)	20	0.2465
1	2017-03-25	137	5	Mixture of five (oats, wheat, crimson clover, radish, and turnip)	30	0.282
1	2017-03-25	137	5	Mixture of five (oats, wheat, crimson clover, radish, and turnip)	40	0.255
1	2017-03-25	137	5	Mixture of five (oats, wheat, crimson clover, radish, and turnip)	60	0.25175
1	2017-03-25	137	1	Mixture of two (crimson clover and rye)	10	0.0165
1	2017-03-25	137	1	Mixture of two (crimson clover and rye)	20	0.076
1	2017-03-25	137	1	Mixture of two (crimson clover and rye)	30	0.17125
1	2017-03-25	137	1	Mixture of two (crimson clover and rye)	40	0.22675
1	2017-03-25	137	1	Mixture of two (crimson clover and rye)	60	0.244
1	2017-03-25	137	2	Mixture of two (crimson clover and rye)	10	0.12925
1	2017-03-25	137	2	Mixture of two (crimson clover and rye)	20	0.255
1	2017-03-25	137	2	Mixture of two (crimson clover and rye)	30	0.3005
1	2017-03-25	137	2	Mixture of two (crimson clover and rye)	40	0.31625
1	2017-03-25	137	2	Mixture of two (crimson clover and rye)	60	0.33825
1	2017-03-25	137	3	Mixture of two (crimson clover and rye)	10	0.065
1	2017-03-25	137	3	Mixture of two (crimson clover and rye)	20	0.09925
1	2017-03-25	137	3	Mixture of two (crimson clover and rye)	30	0.21375
1	2017-03-25	137	3	Mixture of two (crimson clover and rye)	40	0.28125
1	2017-03-25	137	3	Mixture of two (crimson clover and rye)	60	0.35825
1	2017-03-25	137	4	Mixture of two (crimson clover and rye)	10	0.075
1	2017-03-25	137	4	Mixture of two (crimson clover and rye)	20	0.1645
1	2017-03-25	137	4	Mixture of two (crimson clover and rye)	30	0.269
1	2017-03-25	137	4	Mixture of two (crimson clover and rye)	40	0.276
1	2017-03-25	137	4	Mixture of two (crimson clover and rye)	60	0.35175
1	2017-03-25	137	5	Mixture of two (crimson clover and rye)	10	0.15025
1	2017-03-25	137	5	Mixture of two (crimson clover and rye)	20	0.249
1	2017-03-25	137	5	Mixture of two (crimson clover and rye)	30	0.23925
1	2017-03-25	137	5	Mixture of two (crimson clover and rye)	40	0.19175
1	2017-03-25	137	5	Mixture of two (crimson clover and rye)	60	0.361
1	2017-03-25	137	1	Mixture of two (oat and radish)	10	0.0325
1	2017-03-25	137	1	Mixture of two (oat and radish)	20	0.07625
1	2017-03-25	137	1	Mixture of two (oat and radish)	30	0.18375
1	2017-03-25	137	1	Mixture of two (oat and radish)	40	0.287
1	2017-03-25	137	1	Mixture of two (oat and radish)	60	0.3185
1	2017-03-25	137	2	Mixture of two (oat and radish)	10	0.12125
1	2017-03-25	137	2	Mixture of two (oat and radish)	20	0.2095
1	2017-03-25	137	2	Mixture of two (oat and radish)	30	0.26825
1	2017-03-25	137	2	Mixture of two (oat and radish)	40	0.28825
1	2017-03-25	137	2	Mixture of two (oat and radish)	60	0.336
1	2017-03-25	137	3	Mixture of two (oat and radish)	10	0.07225
1	2017-03-25	137	3	Mixture of two (oat and radish)	20	0.2175
1	2017-03-25	137	3	Mixture of two (oat and radish)	30	0.33425
1	2017-03-25	137	3	Mixture of two (oat and radish)	40	0.3495
1	2017-03-25	137	3	Mixture of two (oat and radish)	60	0.3545
1	2017-03-25	137	4	Mixture of two (oat and radish)	10	0.06625
1	2017-03-25	137	4	Mixture of two (oat and radish)	20	0.2195
1	2017-03-25	137	4	Mixture of two (oat and radish)	30	0.3265
1	2017-03-25	137	4	Mixture of two (oat and radish)	40	0.34125
1	2017-03-25	137	4	Mixture of two (oat and radish)	60	0.3365
1	2017-03-25	137	5	Mixture of two (oat and radish)	10	0.1255
1	2017-03-25	137	5	Mixture of two (oat and radish)	20	0.29875
1	2017-03-25	137	5	Mixture of two (oat and radish)	30	0.313
1	2017-03-25	137	5	Mixture of two (oat and radish)	40	0.30125
1	2017-03-25	137	5	Mixture of two (oat and radish)	60	0.29125
1	2017-03-25	137	1	Mixture of two (crimson clover and turnip)	10	0.0135
1	2017-03-25	137	1	Mixture of two (crimson clover and turnip)	20	0.0695
1	2017-03-25	137	1	Mixture of two (crimson clover and turnip)	30	0.17325
1	2017-03-25	137	1	Mixture of two (crimson clover and turnip)	40	0.271
1	2017-03-25	137	1	Mixture of two (crimson clover and turnip)	60	0.30175
1	2017-03-25	137	2	Mixture of two (crimson clover and turnip)	10	0.11475
1	2017-03-25	137	2	Mixture of two (crimson clover and turnip)	20	0.2385
1	2017-03-25	137	2	Mixture of two (crimson clover and turnip)	30	0.28625
1	2017-03-25	137	2	Mixture of two (crimson clover and turnip)	40	0.32325
1	2017-03-25	137	2	Mixture of two (crimson clover and turnip)	60	0.38025
1	2017-03-25	137	3	Mixture of two (crimson clover and turnip)	10	0.10625
1	2017-03-25	137	3	Mixture of two (crimson clover and turnip)	20	0.268
1	2017-03-25	137	3	Mixture of two (crimson clover and turnip)	30	0.3135
1	2017-03-25	137	3	Mixture of two (crimson clover and turnip)	40	0.3335
1	2017-03-25	137	3	Mixture of two (crimson clover and turnip)	60	0.34125
1	2017-03-25	137	5	Mixture of two (crimson clover and turnip)	10	0.1595
1	2017-03-25	137	5	Mixture of two (crimson clover and turnip)	20	0.289
1	2017-03-25	137	5	Mixture of two (crimson clover and turnip)	30	0.21475
1	2017-03-25	137	5	Mixture of two (crimson clover and turnip)	40	0.257
1	2017-03-25	137	5	Mixture of two (crimson clover and turnip)	60	0.32925
1	2017-03-25	137	1	Single species (crimson clover)	10	0.0405
1	2017-03-25	137	1	Single species (crimson clover)	20	0.11925
1	2017-03-25	137	1	Single species (crimson clover)	30	0.2405
1	2017-03-25	137	1	Single species (crimson clover)	40	0.27825
1	2017-03-25	137	1	Single species (crimson clover)	60	0.335
1	2017-03-25	137	2	Single species (crimson clover)	10	0.157
1	2017-03-25	137	2	Single species (crimson clover)	20	0.218
1	2017-03-25	137	2	Single species (crimson clover)	30	0.26775
1	2017-03-25	137	2	Single species (crimson clover)	40	0.3165
1	2017-03-25	137	2	Single species (crimson clover)	60	0.37125
1	2017-03-25	137	3	Single species (crimson clover)	10	0.122
1	2017-03-25	137	3	Single species (crimson clover)	20	0.237
1	2017-03-25	137	3	Single species (crimson clover)	30	0.198
1	2017-03-25	137	3	Single species (crimson clover)	40	0.2445
1	2017-03-25	137	3	Single species (crimson clover)	60	0.3715
1	2017-03-25	137	4	Single species (crimson clover)	10	0.0095
1	2017-03-25	137	4	Single species (crimson clover)	20	0.14575
1	2017-03-25	137	4	Single species (crimson clover)	30	0.3305
1	2017-03-25	137	4	Single species (crimson clover)	40	0.3535
1	2017-03-25	137	4	Single species (crimson clover)	60	0.368
1	2017-03-25	137	5	Single species (crimson clover)	10	0.0605
1	2017-03-25	137	5	Single species (crimson clover)	20	0.15675
1	2017-03-25	137	5	Single species (crimson clover)	30	0.25625
1	2017-03-25	137	5	Single species (crimson clover)	40	0.3985
1	2017-03-25	137	5	Single species (crimson clover)	60	0.29525
1	2017-03-25	137	1	Single species (rye)	10	0.14075
1	2017-03-25	137	1	Single species (rye)	20	0.2145
1	2017-03-25	137	1	Single species (rye)	30	0.2805
1	2017-03-25	137	1	Single species (rye)	40	0.28875
1	2017-03-25	137	1	Single species (rye)	60	0.33825
1	2017-03-25	137	2	Single species (rye)	10	0.1115
1	2017-03-25	137	2	Single species (rye)	20	0.25175
1	2017-03-25	137	2	Single species (rye)	30	0.27225
1	2017-03-25	137	2	Single species (rye)	40	0.20825
1	2017-03-25	137	2	Single species (rye)	60	0.279
1	2017-03-25	137	3	Single species (rye)	10	0.06125
1	2017-03-25	137	3	Single species (rye)	20	0.2295
1	2017-03-25	137	3	Single species (rye)	30	0.25075
1	2017-03-25	137	3	Single species (rye)	40	0.2775
1	2017-03-25	137	3	Single species (rye)	60	0.278
1	2017-03-25	137	4	Single species (rye)	10	0.087
1	2017-03-25	137	4	Single species (rye)	20	0.21875
1	2017-03-25	137	4	Single species (rye)	30	0.2615
1	2017-03-25	137	4	Single species (rye)	40	0.2825
1	2017-03-25	137	4	Single species (rye)	60	0.304
1	2017-03-25	137	5	Single species (rye)	10	0.1215
1	2017-03-25	137	5	Single species (rye)	20	0.20475
1	2017-03-25	137	5	Single species (rye)	30	0.328
1	2017-03-25	137	5	Single species (rye)	40	0.21275
1	2017-03-25	137	5	Single species (rye)	60	0.259
1	2017-03-25	137	1	Control 1 - Fallow with herbicide control	10	0.10125
1	2017-03-25	137	1	Control 1 - Fallow with herbicide control	20	0.2545
1	2017-03-25	137	1	Control 1 - Fallow with herbicide control	30	0.255
1	2017-03-25	137	1	Control 1 - Fallow with herbicide control	40	0.24175
1	2017-03-25	137	1	Control 1 - Fallow with herbicide control	60	0.3585
1	2017-03-25	137	2	Control 1 - Fallow with herbicide control	10	0.168
1	2017-03-25	137	2	Control 1 - Fallow with herbicide control	20	0.23725
1	2017-03-25	137	2	Control 1 - Fallow with herbicide control	30	0.305
1	2017-03-25	137	2	Control 1 - Fallow with herbicide control	40	0.324
1	2017-03-25	137	2	Control 1 - Fallow with herbicide control	60	0.36725
1	2017-03-25	137	3	Control 1 - Fallow with herbicide control	10	0.07775
1	2017-03-25	137	3	Control 1 - Fallow with herbicide control	20	0.163
1	2017-03-25	137	3	Control 1 - Fallow with herbicide control	30	0.29525
1	2017-03-25	137	3	Control 1 - Fallow with herbicide control	40	0.2665
1	2017-03-25	137	3	Control 1 - Fallow with herbicide control	60	0.342
1	2017-03-25	137	4	Control 1 - Fallow with herbicide control	10	0.05575
1	2017-03-25	137	4	Control 1 - Fallow with herbicide control	20	0.14075
1	2017-03-25	137	4	Control 1 - Fallow with herbicide control	30	0.28075
1	2017-03-25	137	4	Control 1 - Fallow with herbicide control	40	0.36825
1	2017-03-25	137	4	Control 1 - Fallow with herbicide control	60	0.394
1	2017-03-25	137	5	Control 1 - Fallow with herbicide control	10	0.06975
1	2017-03-25	137	5	Control 1 - Fallow with herbicide control	20	0.0935
1	2017-03-25	137	5	Control 1 - Fallow with herbicide control	30	0.34325
1	2017-03-25	137	5	Control 1 - Fallow with herbicide control	40	0.31125
1	2017-03-25	137	5	Control 1 - Fallow with herbicide control	60	0.22325
1	2017-03-25	137	1	Control 2 - Fallow without herbicide control	10	0.02375
1	2017-03-25	137	1	Control 2 - Fallow without herbicide control	20	0.09075
1	2017-03-25	137	1	Control 2 - Fallow without herbicide control	30	0.12325
1	2017-03-25	137	1	Control 2 - Fallow without herbicide control	40	0.20925
1	2017-03-25	137	1	Control 2 - Fallow without herbicide control	60	0.28975
1	2017-03-25	137	2	Control 2 - Fallow without herbicide control	10	0.10675
1	2017-03-25	137	2	Control 2 - Fallow without herbicide control	20	0.29175
1	2017-03-25	137	2	Control 2 - Fallow without herbicide control	30	0.32975
1	2017-03-25	137	2	Control 2 - Fallow without herbicide control	40	0.33125
1	2017-03-25	137	2	Control 2 - Fallow without herbicide control	60	0.3375
1	2017-03-25	137	3	Control 2 - Fallow without herbicide control	10	0.15425
1	2017-03-25	137	3	Control 2 - Fallow without herbicide control	20	0.23075
1	2017-03-25	137	3	Control 2 - Fallow without herbicide control	30	0.26075
1	2017-03-25	137	3	Control 2 - Fallow without herbicide control	40	0.298
1	2017-03-25	137	3	Control 2 - Fallow without herbicide control	60	0.32525
1	2017-03-25	137	5	Control 2 - Fallow without herbicide control	10	0.155
1	2017-03-25	137	5	Control 2 - Fallow without herbicide control	20	0.258
1	2017-03-25	137	5	Control 2 - Fallow without herbicide control	30	0.2625
1	2017-03-25	137	5	Control 2 - Fallow without herbicide control	40	0.25025
1	2017-03-25	137	5	Control 2 - Fallow without herbicide control	60	0.23075
1	2017-04-19	162	1	Mixture of five (Austrian winter peas, rye, wheat, crimson clover, hairy vetch, and oats)	10	.
1	2017-04-19	162	1	Mixture of five (Austrian winter peas, rye, wheat, crimson clover, hairy vetch, and oats)	20	.
1	2017-04-19	162	1	Mixture of five (Austrian winter peas, rye, wheat, crimson clover, hairy vetch, and oats)	30	.
1	2017-04-19	162	1	Mixture of five (Austrian winter peas, rye, wheat, crimson clover, hairy vetch, and oats)	40	.
1	2017-04-19	162	1	Mixture of five (Austrian winter peas, rye, wheat, crimson clover, hairy vetch, and oats)	60	.
1	2017-04-19	162	2	Mixture of five (Austrian winter peas, rye, wheat, crimson clover, hairy vetch, and oats)	10	0.059
1	2017-04-19	162	2	Mixture of five (Austrian winter peas, rye, wheat, crimson clover, hairy vetch, and oats)	20	0.153333
1	2017-04-19	162	2	Mixture of five (Austrian winter peas, rye, wheat, crimson clover, hairy vetch, and oats)	30	0.253667
1	2017-04-19	162	2	Mixture of five (Austrian winter peas, rye, wheat, crimson clover, hairy vetch, and oats)	40	0.258333
1	2017-04-19	162	2	Mixture of five (Austrian winter peas, rye, wheat, crimson clover, hairy vetch, and oats)	60	0.317
1	2017-04-19	162	3	Mixture of five (Austrian winter peas, rye, wheat, crimson clover, hairy vetch, and oats)	10	0.103
1	2017-04-19	162	3	Mixture of five (Austrian winter peas, rye, wheat, crimson clover, hairy vetch, and oats)	20	0.243
1	2017-04-19	162	3	Mixture of five (Austrian winter peas, rye, wheat, crimson clover, hairy vetch, and oats)	30	0.296333
1	2017-04-19	162	3	Mixture of five (Austrian winter peas, rye, wheat, crimson clover, hairy vetch, and oats)	40	0.315
1	2017-04-19	162	3	Mixture of five (Austrian winter peas, rye, wheat, crimson clover, hairy vetch, and oats)	60	0.356
1	2017-04-19	162	4	Mixture of five (Austrian winter peas, rye, wheat, crimson clover, hairy vetch, and oats)	10	0.0983333
1	2017-04-19	162	4	Mixture of five (Austrian winter peas, rye, wheat, crimson clover, hairy vetch, and oats)	20	0.161333
1	2017-04-19	162	4	Mixture of five (Austrian winter peas, rye, wheat, crimson clover, hairy vetch, and oats)	30	0.260333
1	2017-04-19	162	4	Mixture of five (Austrian winter peas, rye, wheat, crimson clover, hairy vetch, and oats)	40	0.333
1	2017-04-19	162	4	Mixture of five (Austrian winter peas, rye, wheat, crimson clover, hairy vetch, and oats)	60	0.307333
1	2017-04-19	162	5	Mixture of five (Austrian winter peas, rye, wheat, crimson clover, hairy vetch, and oats)	10	0.160667
1	2017-04-19	162	5	Mixture of five (Austrian winter peas, rye, wheat, crimson clover, hairy vetch, and oats)	20	0.25
1	2017-04-19	162	5	Mixture of five (Austrian winter peas, rye, wheat, crimson clover, hairy vetch, and oats)	30	0.325667
1	2017-04-19	162	5	Mixture of five (Austrian winter peas, rye, wheat, crimson clover, hairy vetch, and oats)	40	0.369667
1	2017-04-19	162	5	Mixture of five (Austrian winter peas, rye, wheat, crimson clover, hairy vetch, and oats)	60	0.402333
1	2017-04-19	162	1	Mixture of five (oats, wheat, crimson clover, radish, and turnip)	10	0.055
1	2017-04-19	162	1	Mixture of five (oats, wheat, crimson clover, radish, and turnip)	20	0.158333
1	2017-04-19	162	1	Mixture of five (oats, wheat, crimson clover, radish, and turnip)	30	0.202
1	2017-04-19	162	1	Mixture of five (oats, wheat, crimson clover, radish, and turnip)	40	0.293667
1	2017-04-19	162	1	Mixture of five (oats, wheat, crimson clover, radish, and turnip)	60	0.351333
1	2017-04-19	162	2	Mixture of five (oats, wheat, crimson clover, radish, and turnip)	10	0.121333
1	2017-04-19	162	2	Mixture of five (oats, wheat, crimson clover, radish, and turnip)	20	0.126333
1	2017-04-19	162	2	Mixture of five (oats, wheat, crimson clover, radish, and turnip)	30	0.271667
1	2017-04-19	162	2	Mixture of five (oats, wheat, crimson clover, radish, and turnip)	40	0.324333
1	2017-04-19	162	2	Mixture of five (oats, wheat, crimson clover, radish, and turnip)	60	0.485667
1	2017-04-19	162	3	Mixture of five (oats, wheat, crimson clover, radish, and turnip)	10	0.102667
1	2017-04-19	162	3	Mixture of five (oats, wheat, crimson clover, radish, and turnip)	20	0.189667
1	2017-04-19	162	3	Mixture of five (oats, wheat, crimson clover, radish, and turnip)	30	0.276667
1	2017-04-19	162	3	Mixture of five (oats, wheat, crimson clover, radish, and turnip)	40	0.301
1	2017-04-19	162	3	Mixture of five (oats, wheat, crimson clover, radish, and turnip)	60	0.372
1	2017-04-19	162	4	Mixture of five (oats, wheat, crimson clover, radish, and turnip)	10	0.063
1	2017-04-19	162	4	Mixture of five (oats, wheat, crimson clover, radish, and turnip)	20	0.180333
1	2017-04-19	162	4	Mixture of five (oats, wheat, crimson clover, radish, and turnip)	30	0.330333
1	2017-04-19	162	4	Mixture of five (oats, wheat, crimson clover, radish, and turnip)	40	0.362667
1	2017-04-19	162	4	Mixture of five (oats, wheat, crimson clover, radish, and turnip)	60	0.373667
1	2017-04-19	162	5	Mixture of five (oats, wheat, crimson clover, radish, and turnip)	10	0.146
1	2017-04-19	162	5	Mixture of five (oats, wheat, crimson clover, radish, and turnip)	20	0.242667
1	2017-04-19	162	5	Mixture of five (oats, wheat, crimson clover, radish, and turnip)	30	0.298333
1	2017-04-19	162	5	Mixture of five (oats, wheat, crimson clover, radish, and turnip)	40	0.309333
1	2017-04-19	162	5	Mixture of five (oats, wheat, crimson clover, radish, and turnip)	60	0.259333
1	2017-04-19	162	1	Mixture of two (crimson clover and rye)	10	0.00533333
1	2017-04-19	162	1	Mixture of two (crimson clover and rye)	20	0.0666667
1	2017-04-19	162	1	Mixture of two (crimson clover and rye)	30	0.195
1	2017-04-19	162	1	Mixture of two (crimson clover and rye)	40	0.221333
1	2017-04-19	162	1	Mixture of two (crimson clover and rye)	60	0.221333
1	2017-04-19	162	2	Mixture of two (crimson clover and rye)	10	0.115333
1	2017-04-19	162	2	Mixture of two (crimson clover and rye)	20	0.263667
1	2017-04-19	162	2	Mixture of two (crimson clover and rye)	30	0.302333
1	2017-04-19	162	2	Mixture of two (crimson clover and rye)	40	0.322333
1	2017-04-19	162	2	Mixture of two (crimson clover and rye)	60	0.343
1	2017-04-19	162	3	Mixture of two (crimson clover and rye)	10	0.0543333
1	2017-04-19	162	3	Mixture of two (crimson clover and rye)	20	0.0986667
1	2017-04-19	162	3	Mixture of two (crimson clover and rye)	30	0.203667
1	2017-04-19	162	3	Mixture of two (crimson clover and rye)	40	0.283
1	2017-04-19	162	3	Mixture of two (crimson clover and rye)	60	0.358
1	2017-04-19	162	4	Mixture of two (crimson clover and rye)	10	0.0736667
1	2017-04-19	162	4	Mixture of two (crimson clover and rye)	20	0.172333
1	2017-04-19	162	4	Mixture of two (crimson clover and rye)	30	0.281667
1	2017-04-19	162	4	Mixture of two (crimson clover and rye)	40	0.288667
1	2017-04-19	162	4	Mixture of two (crimson clover and rye)	60	0.352333
1	2017-04-19	162	5	Mixture of two (crimson clover and rye)	10	0.195
1	2017-04-19	162	5	Mixture of two (crimson clover and rye)	20	0.255333
1	2017-04-19	162	5	Mixture of two (crimson clover and rye)	30	0.256333
1	2017-04-19	162	5	Mixture of two (crimson clover and rye)	40	0.249667
1	2017-04-19	162	5	Mixture of two (crimson clover and rye)	60	0.325
1	2017-04-19	162	1	Mixture of two (oat and radish)	10	0.024
1	2017-04-19	162	1	Mixture of two (oat and radish)	20	0.0703333
1	2017-04-19	162	1	Mixture of two (oat and radish)	30	0.172333
1	2017-04-19	162	1	Mixture of two (oat and radish)	40	0.279
1	2017-04-19	162	1	Mixture of two (oat and radish)	60	0.307333
1	2017-04-19	162	2	Mixture of two (oat and radish)	10	0.106333
1	2017-04-19	162	2	Mixture of two (oat and radish)	20	0.205333
1	2017-04-19	162	2	Mixture of two (oat and radish)	30	0.279
1	2017-04-19	162	2	Mixture of two (oat and radish)	40	0.299667
1	2017-04-19	162	2	Mixture of two (oat and radish)	60	0.334333
1	2017-04-19	162	3	Mixture of two (oat and radish)	10	.
1	2017-04-19	162	3	Mixture of two (oat and radish)	20	.
1	2017-04-19	162	3	Mixture of two (oat and radish)	30	.
1	2017-04-19	162	3	Mixture of two (oat and radish)	40	.
1	2017-04-19	162	3	Mixture of two (oat and radish)	60	.
1	2017-04-19	162	4	Mixture of two (oat and radish)	10	0.0803333
1	2017-04-19	162	4	Mixture of two (oat and radish)	20	0.209
1	2017-04-19	162	4	Mixture of two (oat and radish)	30	0.316667
1	2017-04-19	162	4	Mixture of two (oat and radish)	40	0.340333
1	2017-04-19	162	4	Mixture of two (oat and radish)	60	0.336
1	2017-04-19	162	5	Mixture of two (oat and radish)	10	0.129
1	2017-04-19	162	5	Mixture of two (oat and radish)	20	0.299667
1	2017-04-19	162	5	Mixture of two (oat and radish)	30	0.318333
1	2017-04-19	162	5	Mixture of two (oat and radish)	40	0.332333
1	2017-04-19	162	5	Mixture of two (oat and radish)	60	0.391333
1	2017-04-19	162	1	Mixture of two (crimson clover and turnip)	10	0.006
1	2017-04-19	162	1	Mixture of two (crimson clover and turnip)	20	0.058
1	2017-04-19	162	1	Mixture of two (crimson clover and turnip)	30	0.155333
1	2017-04-19	162	1	Mixture of two (crimson clover and turnip)	40	0.262
1	2017-04-19	162	1	Mixture of two (crimson clover and turnip)	60	0.309667
1	2017-04-19	162	2	Mixture of two (crimson clover and turnip)	10	0.0646667
1	2017-04-19	162	2	Mixture of two (crimson clover and turnip)	20	0.204
1	2017-04-19	162	2	Mixture of two (crimson clover and turnip)	30	0.270333
1	2017-04-19	162	2	Mixture of two (crimson clover and turnip)	40	0.294333
1	2017-04-19	162	2	Mixture of two (crimson clover and turnip)	60	0.365667
1	2017-04-19	162	3	Mixture of two (crimson clover and turnip)	10	0.0806667
1	2017-04-19	162	3	Mixture of two (crimson clover and turnip)	20	0.245333
1	2017-04-19	162	3	Mixture of two (crimson clover and turnip)	30	0.346
1	2017-04-19	162	3	Mixture of two (crimson clover and turnip)	40	0.347333
1	2017-04-19	162	3	Mixture of two (crimson clover and turnip)	60	0.340667
1	2017-04-19	162	5	Mixture of two (crimson clover and turnip)	10	0.169333
1	2017-04-19	162	5	Mixture of two (crimson clover and turnip)	20	0.295333
1	2017-04-19	162	5	Mixture of two (crimson clover and turnip)	30	0.283667
1	2017-04-19	162	5	Mixture of two (crimson clover and turnip)	40	0.309333
1	2017-04-19	162	5	Mixture of two (crimson clover and turnip)	60	0.367333
1	2017-04-19	162	1	Single species (crimson clover)	10	0.0466667
1	2017-04-19	162	1	Single species (crimson clover)	20	0.136667
1	2017-04-19	162	1	Single species (crimson clover)	30	0.267
1	2017-04-19	162	1	Single species (crimson clover)	40	0.330667
1	2017-04-19	162	1	Single species (crimson clover)	60	0.332333
1	2017-04-19	162	2	Single species (crimson clover)	10	0.135
1	2017-04-19	162	2	Single species (crimson clover)	20	0.226333
1	2017-04-19	162	2	Single species (crimson clover)	30	0.272333
1	2017-04-19	162	2	Single species (crimson clover)	40	0.316667
1	2017-04-19	162	2	Single species (crimson clover)	60	0.375333
1	2017-04-19	162	3	Single species (crimson clover)	10	0.029
1	2017-04-19	162	3	Single species (crimson clover)	20	0.064
1	2017-04-19	162	3	Single species (crimson clover)	30	0.173667
1	2017-04-19	162	3	Single species (crimson clover)	40	0.259
1	2017-04-19	162	3	Single species (crimson clover)	60	0.337
1	2017-04-19	162	4	Single species (crimson clover)	10	.
1	2017-04-19	162	4	Single species (crimson clover)	20	0.122667
1	2017-04-19	162	4	Single species (crimson clover)	30	0.312
1	2017-04-19	162	4	Single species (crimson clover)	40	0.352
1	2017-04-19	162	4	Single species (crimson clover)	60	0.369
1	2017-04-19	162	5	Single species (crimson clover)	10	0.063
1	2017-04-19	162	5	Single species (crimson clover)	20	0.202333
1	2017-04-19	162	5	Single species (crimson clover)	30	0.338667
1	2017-04-19	162	5	Single species (crimson clover)	40	0.376
1	2017-04-19	162	5	Single species (crimson clover)	60	0.391667
1	2017-04-19	162	1	Single species (rye)	10	0.118667
1	2017-04-19	162	1	Single species (rye)	20	0.259333
1	2017-04-19	162	1	Single species (rye)	30	0.285
1	2017-04-19	162	1	Single species (rye)	40	0.297333
1	2017-04-19	162	1	Single species (rye)	60	0.347
1	2017-04-19	162	2	Single species (rye)	10	0.0866667
1	2017-04-19	162	2	Single species (rye)	20	0.246
1	2017-04-19	162	2	Single species (rye)	30	0.291
1	2017-04-19	162	2	Single species (rye)	40	0.274667
1	2017-04-19	162	2	Single species (rye)	60	0.351333
1	2017-04-19	162	3	Single species (rye)	10	0.0586667
1	2017-04-19	162	3	Single species (rye)	20	0.237333
1	2017-04-19	162	3	Single species (rye)	30	0.295333
1	2017-04-19	162	3	Single species (rye)	40	0.326333
1	2017-04-19	162	3	Single species (rye)	60	0.367667
1	2017-04-19	162	4	Single species (rye)	10	0.0746667
1	2017-04-19	162	4	Single species (rye)	20	0.228
1	2017-04-19	162	4	Single species (rye)	30	0.282
1	2017-04-19	162	4	Single species (rye)	40	0.290333
1	2017-04-19	162	4	Single species (rye)	60	0.34
1	2017-04-19	162	5	Single species (rye)	10	0.141
1	2017-04-19	162	5	Single species (rye)	20	0.267333
1	2017-04-19	162	5	Single species (rye)	30	0.307
1	2017-04-19	162	5	Single species (rye)	40	0.344
1	2017-04-19	162	5	Single species (rye)	60	0.349
1	2017-04-19	162	1	Control 1 - Fallow with herbicide control	10	0.0686667
1	2017-04-19	162	1	Control 1 - Fallow with herbicide control	20	0.249667
1	2017-04-19	162	1	Control 1 - Fallow with herbicide control	30	0.255
1	2017-04-19	162	1	Control 1 - Fallow with herbicide control	40	0.241667
1	2017-04-19	162	1	Control 1 - Fallow with herbicide control	60	0.362333
1	2017-04-19	162	2	Control 1 - Fallow with herbicide control	10	0.168333
1	2017-04-19	162	2	Control 1 - Fallow with herbicide control	20	0.215333
1	2017-04-19	162	2	Control 1 - Fallow with herbicide control	30	0.294
1	2017-04-19	162	2	Control 1 - Fallow with herbicide control	40	0.326
1	2017-04-19	162	2	Control 1 - Fallow with herbicide control	60	0.365333
1	2017-04-19	162	3	Control 1 - Fallow with herbicide control	10	0.0993333
1	2017-04-19	162	3	Control 1 - Fallow with herbicide control	20	0.171333
1	2017-04-19	162	3	Control 1 - Fallow with herbicide control	30	0.290333
1	2017-04-19	162	3	Control 1 - Fallow with herbicide control	40	0.268
1	2017-04-19	162	3	Control 1 - Fallow with herbicide control	60	0.345333
1	2017-04-19	162	4	Control 1 - Fallow with herbicide control	10	0.046
1	2017-04-19	162	4	Control 1 - Fallow with herbicide control	20	0.136333
1	2017-04-19	162	4	Control 1 - Fallow with herbicide control	30	0.26
1	2017-04-19	162	4	Control 1 - Fallow with herbicide control	40	0.365
1	2017-04-19	162	4	Control 1 - Fallow with herbicide control	60	0.396667
1	2017-04-19	162	5	Control 1 - Fallow with herbicide control	10	0.0916667
1	2017-04-19	162	5	Control 1 - Fallow with herbicide control	20	0.126667
1	2017-04-19	162	5	Control 1 - Fallow with herbicide control	30	0.345333
1	2017-04-19	162	5	Control 1 - Fallow with herbicide control	40	0.317667
1	2017-04-19	162	5	Control 1 - Fallow with herbicide control	60	0.31
1	2017-04-19	162	1	Control 2 - Fallow without herbicide control	10	0.016
1	2017-04-19	162	1	Control 2 - Fallow without herbicide control	20	0.1
1	2017-04-19	162	1	Control 2 - Fallow without herbicide control	30	0.124
1	2017-04-19	162	1	Control 2 - Fallow without herbicide control	40	0.205
1	2017-04-19	162	1	Control 2 - Fallow without herbicide control	60	0.285
1	2017-04-19	162	2	Control 2 - Fallow without herbicide control	10	0.0653333
1	2017-04-19	162	2	Control 2 - Fallow without herbicide control	20	0.284333
1	2017-04-19	162	2	Control 2 - Fallow without herbicide control	30	0.332
1	2017-04-19	162	2	Control 2 - Fallow without herbicide control	40	0.339667
1	2017-04-19	162	2	Control 2 - Fallow without herbicide control	60	0.342
1	2017-04-19	162	3	Control 2 - Fallow without herbicide control	10	0.116333
1	2017-04-19	162	3	Control 2 - Fallow without herbicide control	20	0.227
1	2017-04-19	162	3	Control 2 - Fallow without herbicide control	30	0.267333
1	2017-04-19	162	3	Control 2 - Fallow without herbicide control	40	0.305667
1	2017-04-19	162	3	Control 2 - Fallow without herbicide control	60	0.326667
1	2017-04-19	162	5	Control 2 - Fallow without herbicide control	10	0.148667
1	2017-04-19	162	5	Control 2 - Fallow without herbicide control	20	0.248333
1	2017-04-19	162	5	Control 2 - Fallow without herbicide control	30	0.266667
1	2017-04-19	162	5	Control 2 - Fallow without herbicide control	40	0.258667
1	2017-04-19	162	5	Control 2 - Fallow without herbicide control	60	0.234333
1	2017-08-02	267	1	Mixture of five (Austrian winter peas, rye, wheat, crimson clover, hairy vetch, and oats)	10	0.01475
1	2017-08-02	267	1	Mixture of five (Austrian winter peas, rye, wheat, crimson clover, hairy vetch, and oats)	20	0.06
1	2017-08-02	267	1	Mixture of five (Austrian winter peas, rye, wheat, crimson clover, hairy vetch, and oats)	30	0.1815
1	2017-08-02	267	1	Mixture of five (Austrian winter peas, rye, wheat, crimson clover, hairy vetch, and oats)	40	0.26725
1	2017-08-02	267	1	Mixture of five (Austrian winter peas, rye, wheat, crimson clover, hairy vetch, and oats)	60	0.3495
1	2017-08-02	267	2	Mixture of five (Austrian winter peas, rye, wheat, crimson clover, hairy vetch, and oats)	10	0.11875
1	2017-08-02	267	2	Mixture of five (Austrian winter peas, rye, wheat, crimson clover, hairy vetch, and oats)	20	0.1765
1	2017-08-02	267	2	Mixture of five (Austrian winter peas, rye, wheat, crimson clover, hairy vetch, and oats)	30	0.26
1	2017-08-02	267	2	Mixture of five (Austrian winter peas, rye, wheat, crimson clover, hairy vetch, and oats)	40	0.271
1	2017-08-02	267	2	Mixture of five (Austrian winter peas, rye, wheat, crimson clover, hairy vetch, and oats)	60	0.3365
1	2017-08-02	267	3	Mixture of five (Austrian winter peas, rye, wheat, crimson clover, hairy vetch, and oats)	10	0.1365
1	2017-08-02	267	3	Mixture of five (Austrian winter peas, rye, wheat, crimson clover, hairy vetch, and oats)	20	0.24675
1	2017-08-02	267	3	Mixture of five (Austrian winter peas, rye, wheat, crimson clover, hairy vetch, and oats)	30	0.30775
1	2017-08-02	267	3	Mixture of five (Austrian winter peas, rye, wheat, crimson clover, hairy vetch, and oats)	40	0.3285
1	2017-08-02	267	3	Mixture of five (Austrian winter peas, rye, wheat, crimson clover, hairy vetch, and oats)	60	0.37725
1	2017-08-02	267	4	Mixture of five (Austrian winter peas, rye, wheat, crimson clover, hairy vetch, and oats)	10	0.07075
1	2017-08-02	267	4	Mixture of five (Austrian winter peas, rye, wheat, crimson clover, hairy vetch, and oats)	20	0.17775
1	2017-08-02	267	4	Mixture of five (Austrian winter peas, rye, wheat, crimson clover, hairy vetch, and oats)	30	0.2755
1	2017-08-02	267	4	Mixture of five (Austrian winter peas, rye, wheat, crimson clover, hairy vetch, and oats)	40	0.35325
1	2017-08-02	267	4	Mixture of five (Austrian winter peas, rye, wheat, crimson clover, hairy vetch, and oats)	60	0.31975
1	2017-08-02	267	5	Mixture of five (Austrian winter peas, rye, wheat, crimson clover, hairy vetch, and oats)	10	0.1075
1	2017-08-02	267	5	Mixture of five (Austrian winter peas, rye, wheat, crimson clover, hairy vetch, and oats)	20	0.2435
1	2017-08-02	267	5	Mixture of five (Austrian winter peas, rye, wheat, crimson clover, hairy vetch, and oats)	30	0.33475
1	2017-08-02	267	5	Mixture of five (Austrian winter peas, rye, wheat, crimson clover, hairy vetch, and oats)	40	0.39725
1	2017-08-02	267	5	Mixture of five (Austrian winter peas, rye, wheat, crimson clover, hairy vetch, and oats)	60	0.42275
1	2017-08-02	267	1	Mixture of five (oats, wheat, crimson clover, radish, and turnip)	10	0.10375
1	2017-08-02	267	1	Mixture of five (oats, wheat, crimson clover, radish, and turnip)	20	0.13925
1	2017-08-02	267	1	Mixture of five (oats, wheat, crimson clover, radish, and turnip)	30	0.25325
1	2017-08-02	267	1	Mixture of five (oats, wheat, crimson clover, radish, and turnip)	40	0.3155
1	2017-08-02	267	1	Mixture of five (oats, wheat, crimson clover, radish, and turnip)	60	0.36675
1	2017-08-02	267	2	Mixture of five (oats, wheat, crimson clover, radish, and turnip)	10	0.13375
1	2017-08-02	267	2	Mixture of five (oats, wheat, crimson clover, radish, and turnip)	20	0.2205
1	2017-08-02	267	2	Mixture of five (oats, wheat, crimson clover, radish, and turnip)	30	0.304
1	2017-08-02	267	2	Mixture of five (oats, wheat, crimson clover, radish, and turnip)	40	0.342
1	2017-08-02	267	2	Mixture of five (oats, wheat, crimson clover, radish, and turnip)	60	0.36825
1	2017-08-02	267	3	Mixture of five (oats, wheat, crimson clover, radish, and turnip)	10	0.1105
1	2017-08-02	267	3	Mixture of five (oats, wheat, crimson clover, radish, and turnip)	20	0.19175
1	2017-08-02	267	3	Mixture of five (oats, wheat, crimson clover, radish, and turnip)	30	0.28575
1	2017-08-02	267	3	Mixture of five (oats, wheat, crimson clover, radish, and turnip)	40	0.31525
1	2017-08-02	267	3	Mixture of five (oats, wheat, crimson clover, radish, and turnip)	60	0.39475
1	2017-08-02	267	4	Mixture of five (oats, wheat, crimson clover, radish, and turnip)	10	0.07225
1	2017-08-02	267	4	Mixture of five (oats, wheat, crimson clover, radish, and turnip)	20	0.196
1	2017-08-02	267	4	Mixture of five (oats, wheat, crimson clover, radish, and turnip)	30	0.3425
1	2017-08-02	267	4	Mixture of five (oats, wheat, crimson clover, radish, and turnip)	40	0.37075
1	2017-08-02	267	4	Mixture of five (oats, wheat, crimson clover, radish, and turnip)	60	0.39575
1	2017-08-02	267	5	Mixture of five (oats, wheat, crimson clover, radish, and turnip)	10	0.1205
1	2017-08-02	267	5	Mixture of five (oats, wheat, crimson clover, radish, and turnip)	20	0.22575
1	2017-08-02	267	5	Mixture of five (oats, wheat, crimson clover, radish, and turnip)	30	0.28975
1	2017-08-02	267	5	Mixture of five (oats, wheat, crimson clover, radish, and turnip)	40	0.3125
1	2017-08-02	267	5	Mixture of five (oats, wheat, crimson clover, radish, and turnip)	60	0.257
1	2017-08-02	267	1	Mixture of two (crimson clover and rye)	10	0.00625
1	2017-08-02	267	1	Mixture of two (crimson clover and rye)	20	0.08275
1	2017-08-02	267	1	Mixture of two (crimson clover and rye)	30	0.1725
1	2017-08-02	267	1	Mixture of two (crimson clover and rye)	40	0.24475
1	2017-08-02	267	1	Mixture of two (crimson clover and rye)	60	0.24375
1	2017-08-02	267	2	Mixture of two (crimson clover and rye)	10	0.1085
1	2017-08-02	267	2	Mixture of two (crimson clover and rye)	20	0.23475
1	2017-08-02	267	2	Mixture of two (crimson clover and rye)	30	0.30525
1	2017-08-02	267	2	Mixture of two (crimson clover and rye)	40	0.33075
1	2017-08-02	267	2	Mixture of two (crimson clover and rye)	60	0.34575
1	2017-08-02	267	3	Mixture of two (crimson clover and rye)	10	0.05
1	2017-08-02	267	3	Mixture of two (crimson clover and rye)	20	0.099
1	2017-08-02	267	3	Mixture of two (crimson clover and rye)	30	0.21775
1	2017-08-02	267	3	Mixture of two (crimson clover and rye)	40	0.3005
1	2017-08-02	267	3	Mixture of two (crimson clover and rye)	60	0.38225
1	2017-08-02	267	4	Mixture of two (crimson clover and rye)	10	0.091
1	2017-08-02	267	4	Mixture of two (crimson clover and rye)	20	0.16725
1	2017-08-02	267	4	Mixture of two (crimson clover and rye)	30	0.277
1	2017-08-02	267	4	Mixture of two (crimson clover and rye)	40	0.2925
1	2017-08-02	267	4	Mixture of two (crimson clover and rye)	60	0.36625
1	2017-08-02	267	5	Mixture of two (crimson clover and rye)	10	0.169
1	2017-08-02	267	5	Mixture of two (crimson clover and rye)	20	0.27825
1	2017-08-02	267	5	Mixture of two (crimson clover and rye)	30	0.2655
1	2017-08-02	267	5	Mixture of two (crimson clover and rye)	40	0.259
1	2017-08-02	267	5	Mixture of two (crimson clover and rye)	60	0.38675
1	2017-08-02	267	1	Mixture of two (oat and radish)	10	0.04875
1	2017-08-02	267	1	Mixture of two (oat and radish)	20	0.08375
1	2017-08-02	267	1	Mixture of two (oat and radish)	30	0.20025
1	2017-08-02	267	1	Mixture of two (oat and radish)	40	0.30225
1	2017-08-02	267	1	Mixture of two (oat and radish)	60	0.323
1	2017-08-02	267	2	Mixture of two (oat and radish)	10	0.145
1	2017-08-02	267	2	Mixture of two (oat and radish)	20	0.225667
1	2017-08-02	267	2	Mixture of two (oat and radish)	30	0.282333
1	2017-08-02	267	2	Mixture of two (oat and radish)	40	0.308
1	2017-08-02	267	2	Mixture of two (oat and radish)	60	0.345333
1	2017-08-02	267	3	Mixture of two (oat and radish)	10	0.06525
1	2017-08-02	267	3	Mixture of two (oat and radish)	20	0.207
1	2017-08-02	267	3	Mixture of two (oat and radish)	30	0.35025
1	2017-08-02	267	3	Mixture of two (oat and radish)	40	0.37525
1	2017-08-02	267	3	Mixture of two (oat and radish)	60	0.373
1	2017-08-02	267	4	Mixture of two (oat and radish)	10	0.09675
1	2017-08-02	267	4	Mixture of two (oat and radish)	20	0.236
1	2017-08-02	267	4	Mixture of two (oat and radish)	30	0.34475
1	2017-08-02	267	4	Mixture of two (oat and radish)	40	0.36825
1	2017-08-02	267	4	Mixture of two (oat and radish)	60	0.36075
1	2017-08-02	267	5	Mixture of two (oat and radish)	10	.
1	2017-08-02	267	5	Mixture of two (oat and radish)	20	.
1	2017-08-02	267	5	Mixture of two (oat and radish)	30	.
1	2017-08-02	267	5	Mixture of two (oat and radish)	40	.
1	2017-08-02	267	5	Mixture of two (oat and radish)	60	.
1	2017-08-02	267	1	Mixture of two (crimson clover and turnip)	10	0.00825
1	2017-08-02	267	1	Mixture of two (crimson clover and turnip)	20	0.05625
1	2017-08-02	267	1	Mixture of two (crimson clover and turnip)	30	0.16175
1	2017-08-02	267	1	Mixture of two (crimson clover and turnip)	40	0.2875
1	2017-08-02	267	1	Mixture of two (crimson clover and turnip)	60	0.3195
1	2017-08-02	267	2	Mixture of two (crimson clover and turnip)	10	0.06575
1	2017-08-02	267	2	Mixture of two (crimson clover and turnip)	20	0.21375
1	2017-08-02	267	2	Mixture of two (crimson clover and turnip)	30	0.2745
1	2017-08-02	267	2	Mixture of two (crimson clover and turnip)	40	0.312
1	2017-08-02	267	2	Mixture of two (crimson clover and turnip)	60	0.371
1	2017-08-02	267	3	Mixture of two (crimson clover and turnip)	10	0.1255
1	2017-08-02	267	3	Mixture of two (crimson clover and turnip)	20	0.26925
1	2017-08-02	267	3	Mixture of two (crimson clover and turnip)	30	0.3575
1	2017-08-02	267	3	Mixture of two (crimson clover and turnip)	40	0.3625
1	2017-08-02	267	3	Mixture of two (crimson clover and turnip)	60	0.355
1	2017-08-02	267	5	Mixture of two (crimson clover and turnip)	10	0.1565
1	2017-08-02	267	5	Mixture of two (crimson clover and turnip)	20	0.28725
1	2017-08-02	267	5	Mixture of two (crimson clover and turnip)	30	0.28375
1	2017-08-02	267	5	Mixture of two (crimson clover and turnip)	40	0.315
1	2017-08-02	267	5	Mixture of two (crimson clover and turnip)	60	0.3785
1	2017-08-02	267	1	Single species (crimson clover)	10	0.0625
1	2017-08-02	267	1	Single species (crimson clover)	20	0.13475
1	2017-08-02	267	1	Single species (crimson clover)	30	0.27175
1	2017-08-02	267	1	Single species (crimson clover)	40	0.33625
1	2017-08-02	267	1	Single species (crimson clover)	60	0.347
1	2017-08-02	267	2	Single species (crimson clover)	10	0.1005
1	2017-08-02	267	2	Single species (crimson clover)	20	0.20425
1	2017-08-02	267	2	Single species (crimson clover)	30	0.2575
1	2017-08-02	267	2	Single species (crimson clover)	40	0.31175
1	2017-08-02	267	2	Single species (crimson clover)	60	0.38825
1	2017-08-02	267	3	Single species (crimson clover)	10	0.106
1	2017-08-02	267	3	Single species (crimson clover)	20	0.234
1	2017-08-02	267	3	Single species (crimson clover)	30	0.276
1	2017-08-02	267	3	Single species (crimson clover)	40	0.3225
1	2017-08-02	267	3	Single species (crimson clover)	60	0.39075
1	2017-08-02	267	4	Single species (crimson clover)	10	0.01475
1	2017-08-02	267	4	Single species (crimson clover)	20	0.15575
1	2017-08-02	267	4	Single species (crimson clover)	30	0.326
1	2017-08-02	267	4	Single species (crimson clover)	40	0.37075
1	2017-08-02	267	4	Single species (crimson clover)	60	0.38675
1	2017-08-02	267	5	Single species (crimson clover)	10	0.119
1	2017-08-02	267	5	Single species (crimson clover)	20	0.216
1	2017-08-02	267	5	Single species (crimson clover)	30	0.33175
1	2017-08-02	267	5	Single species (crimson clover)	40	0.3795
1	2017-08-02	267	5	Single species (crimson clover)	60	0.4165
1	2017-08-02	267	1	Single species (rye)	10	0.1175
1	2017-08-02	267	1	Single species (rye)	20	0.239
1	2017-08-02	267	1	Single species (rye)	30	0.286
1	2017-08-02	267	1	Single species (rye)	40	0.304
1	2017-08-02	267	1	Single species (rye)	60	0.36125
1	2017-08-02	267	2	Single species (rye)	10	0.123
1	2017-08-02	267	2	Single species (rye)	20	0.23875
1	2017-08-02	267	2	Single species (rye)	30	0.2655
1	2017-08-02	267	2	Single species (rye)	40	0.277
1	2017-08-02	267	2	Single species (rye)	60	0.35525
1	2017-08-02	267	3	Single species (rye)	10	0.09325
1	2017-08-02	267	3	Single species (rye)	20	0.2465
1	2017-08-02	267	3	Single species (rye)	30	0.3105
1	2017-08-02	267	3	Single species (rye)	40	0.352
1	2017-08-02	267	3	Single species (rye)	60	0.379
1	2017-08-02	267	4	Single species (rye)	10	0.14175
1	2017-08-02	267	4	Single species (rye)	20	0.24825
1	2017-08-02	267	4	Single species (rye)	30	0.3005
1	2017-08-02	267	4	Single species (rye)	40	0.31625
1	2017-08-02	267	4	Single species (rye)	60	0.36725
1	2017-08-02	267	5	Single species (rye)	10	0.11575
1	2017-08-02	267	5	Single species (rye)	20	0.269
1	2017-08-02	267	5	Single species (rye)	30	0.328
1	2017-08-02	267	5	Single species (rye)	40	0.369
1	2017-08-02	267	5	Single species (rye)	60	0.39525
1	2017-08-02	267	1	Control 1 - Fallow with herbicide control	10	0.0755
1	2017-08-02	267	1	Control 1 - Fallow with herbicide control	20	0.207
1	2017-08-02	267	1	Control 1 - Fallow with herbicide control	30	0.224
1	2017-08-02	267	1	Control 1 - Fallow with herbicide control	40	0.21425
1	2017-08-02	267	1	Control 1 - Fallow with herbicide control	60	0.3585
1	2017-08-02	267	2	Control 1 - Fallow with herbicide control	10	0.0895
1	2017-08-02	267	2	Control 1 - Fallow with herbicide control	20	0.167
1	2017-08-02	267	2	Control 1 - Fallow with herbicide control	30	0.277
1	2017-08-02	267	2	Control 1 - Fallow with herbicide control	40	0.313
1	2017-08-02	267	2	Control 1 - Fallow with herbicide control	60	0.349
1	2017-08-02	267	3	Control 1 - Fallow with herbicide control	10	0.07975
1	2017-08-02	267	3	Control 1 - Fallow with herbicide control	20	0.12225
1	2017-08-02	267	3	Control 1 - Fallow with herbicide control	30	0.22375
1	2017-08-02	267	3	Control 1 - Fallow with herbicide control	40	0.227
1	2017-08-02	267	3	Control 1 - Fallow with herbicide control	60	0.338
1	2017-08-02	267	4	Control 1 - Fallow with herbicide control	10	0.03425
1	2017-08-02	267	4	Control 1 - Fallow with herbicide control	20	0.11675
1	2017-08-02	267	4	Control 1 - Fallow with herbicide control	30	0.2435
1	2017-08-02	267	4	Control 1 - Fallow with herbicide control	40	0.32825
1	2017-08-02	267	4	Control 1 - Fallow with herbicide control	60	0.402
1	2017-08-02	267	5	Control 1 - Fallow with herbicide control	10	0.04025
1	2017-08-02	267	5	Control 1 - Fallow with herbicide control	20	0.10725
1	2017-08-02	267	5	Control 1 - Fallow with herbicide control	30	0.296
1	2017-08-02	267	5	Control 1 - Fallow with herbicide control	40	0.30275
1	2017-08-02	267	5	Control 1 - Fallow with herbicide control	60	0.306
1	2017-08-02	267	1	Control 2 - Fallow without herbicide control	10	0.02025
1	2017-08-02	267	1	Control 2 - Fallow without herbicide control	20	0.09625
1	2017-08-02	267	1	Control 2 - Fallow without herbicide control	30	0.138
1	2017-08-02	267	1	Control 2 - Fallow without herbicide control	40	0.2205
1	2017-08-02	267	1	Control 2 - Fallow without herbicide control	60	0.29925
1	2017-08-02	267	2	Control 2 - Fallow without herbicide control	10	0.05925
1	2017-08-02	267	2	Control 2 - Fallow without herbicide control	20	0.27325
1	2017-08-02	267	2	Control 2 - Fallow without herbicide control	30	0.33375
1	2017-08-02	267	2	Control 2 - Fallow without herbicide control	40	0.34975
1	2017-08-02	267	2	Control 2 - Fallow without herbicide control	60	0.34725
1	2017-08-02	267	3	Control 2 - Fallow without herbicide control	10	0.13325
1	2017-08-02	267	3	Control 2 - Fallow without herbicide control	20	0.224
1	2017-08-02	267	3	Control 2 - Fallow without herbicide control	30	0.2565
1	2017-08-02	267	3	Control 2 - Fallow without herbicide control	40	0.30875
1	2017-08-02	267	3	Control 2 - Fallow without herbicide control	60	0.333
1	2017-08-02	267	5	Control 2 - Fallow without herbicide control	10	0.15425
1	2017-08-02	267	5	Control 2 - Fallow without herbicide control	20	0.2415
1	2017-08-02	267	5	Control 2 - Fallow without herbicide control	30	0.25175
1	2017-08-02	267	5	Control 2 - Fallow without herbicide control	40	0.257
1	2017-08-02	267	5	Control 2 - Fallow without herbicide control	60	0.24025
2	2018-03-05	38	1	Mixture of five (Austrian winter peas, rye, wheat, crimson clover, hairy vetch, and oats)	10	0.02875
2	2018-03-05	38	1	Mixture of five (Austrian winter peas, rye, wheat, crimson clover, hairy vetch, and oats)	20	0.1455
2	2018-03-05	38	1	Mixture of five (Austrian winter peas, rye, wheat, crimson clover, hairy vetch, and oats)	30	0.24325
2	2018-03-05	38	1	Mixture of five (Austrian winter peas, rye, wheat, crimson clover, hairy vetch, and oats)	40	0.2935
2	2018-03-05	38	1	Mixture of five (Austrian winter peas, rye, wheat, crimson clover, hairy vetch, and oats)	60	0.37
2	2018-03-05	38	2	Mixture of five (Austrian winter peas, rye, wheat, crimson clover, hairy vetch, and oats)	10	0.14475
2	2018-03-05	38	2	Mixture of five (Austrian winter peas, rye, wheat, crimson clover, hairy vetch, and oats)	20	0.2045
2	2018-03-05	38	2	Mixture of five (Austrian winter peas, rye, wheat, crimson clover, hairy vetch, and oats)	30	0.27325
2	2018-03-05	38	2	Mixture of five (Austrian winter peas, rye, wheat, crimson clover, hairy vetch, and oats)	40	0.27575
2	2018-03-05	38	2	Mixture of five (Austrian winter peas, rye, wheat, crimson clover, hairy vetch, and oats)	60	0.35
2	2018-03-05	38	3	Mixture of five (Austrian winter peas, rye, wheat, crimson clover, hairy vetch, and oats)	10	0.1055
2	2018-03-05	38	3	Mixture of five (Austrian winter peas, rye, wheat, crimson clover, hairy vetch, and oats)	20	0.28225
2	2018-03-05	38	3	Mixture of five (Austrian winter peas, rye, wheat, crimson clover, hairy vetch, and oats)	30	0.32375
2	2018-03-05	38	3	Mixture of five (Austrian winter peas, rye, wheat, crimson clover, hairy vetch, and oats)	40	0.342
2	2018-03-05	38	3	Mixture of five (Austrian winter peas, rye, wheat, crimson clover, hairy vetch, and oats)	60	0.38975
2	2018-03-05	38	4	Mixture of five (Austrian winter peas, rye, wheat, crimson clover, hairy vetch, and oats)	10	0.162
2	2018-03-05	38	4	Mixture of five (Austrian winter peas, rye, wheat, crimson clover, hairy vetch, and oats)	20	0.2385
2	2018-03-05	38	4	Mixture of five (Austrian winter peas, rye, wheat, crimson clover, hairy vetch, and oats)	30	0.2895
2	2018-03-05	38	4	Mixture of five (Austrian winter peas, rye, wheat, crimson clover, hairy vetch, and oats)	40	0.368
2	2018-03-05	38	4	Mixture of five (Austrian winter peas, rye, wheat, crimson clover, hairy vetch, and oats)	60	0.36525
2	2018-03-05	38	5	Mixture of five (Austrian winter peas, rye, wheat, crimson clover, hairy vetch, and oats)	10	0.18225
2	2018-03-05	38	5	Mixture of five (Austrian winter peas, rye, wheat, crimson clover, hairy vetch, and oats)	20	0.266
2	2018-03-05	38	5	Mixture of five (Austrian winter peas, rye, wheat, crimson clover, hairy vetch, and oats)	30	0.34225
2	2018-03-05	38	5	Mixture of five (Austrian winter peas, rye, wheat, crimson clover, hairy vetch, and oats)	40	0.4045
2	2018-03-05	38	5	Mixture of five (Austrian winter peas, rye, wheat, crimson clover, hairy vetch, and oats)	60	0.44425
2	2018-03-05	38	1	Mixture of five (oats, wheat, crimson clover, radish, and turnip)	10	0.19675
2	2018-03-05	38	1	Mixture of five (oats, wheat, crimson clover, radish, and turnip)	20	0.16775
2	2018-03-05	38	1	Mixture of five (oats, wheat, crimson clover, radish, and turnip)	30	0.27275
2	2018-03-05	38	1	Mixture of five (oats, wheat, crimson clover, radish, and turnip)	40	0.33675
2	2018-03-05	38	1	Mixture of five (oats, wheat, crimson clover, radish, and turnip)	60	0.37725
2	2018-03-05	38	2	Mixture of five (oats, wheat, crimson clover, radish, and turnip)	10	0.22125
2	2018-03-05	38	2	Mixture of five (oats, wheat, crimson clover, radish, and turnip)	20	0.24625
2	2018-03-05	38	2	Mixture of five (oats, wheat, crimson clover, radish, and turnip)	30	0.30675
2	2018-03-05	38	2	Mixture of five (oats, wheat, crimson clover, radish, and turnip)	40	0.3505
2	2018-03-05	38	2	Mixture of five (oats, wheat, crimson clover, radish, and turnip)	60	0.3925
2	2018-03-05	38	3	Mixture of five (oats, wheat, crimson clover, radish, and turnip)	10	0.04375
2	2018-03-05	38	3	Mixture of five (oats, wheat, crimson clover, radish, and turnip)	20	0.17925
2	2018-03-05	38	3	Mixture of five (oats, wheat, crimson clover, radish, and turnip)	30	0.2805
2	2018-03-05	38	3	Mixture of five (oats, wheat, crimson clover, radish, and turnip)	40	0.32675
2	2018-03-05	38	3	Mixture of five (oats, wheat, crimson clover, radish, and turnip)	60	0.40225
2	2018-03-05	38	4	Mixture of five (oats, wheat, crimson clover, radish, and turnip)	10	0.067
2	2018-03-05	38	4	Mixture of five (oats, wheat, crimson clover, radish, and turnip)	20	0.18925
2	2018-03-05	38	4	Mixture of five (oats, wheat, crimson clover, radish, and turnip)	30	0.35825
2	2018-03-05	38	4	Mixture of five (oats, wheat, crimson clover, radish, and turnip)	40	0.3775
2	2018-03-05	38	4	Mixture of five (oats, wheat, crimson clover, radish, and turnip)	60	0.422
2	2018-03-05	38	5	Mixture of five (oats, wheat, crimson clover, radish, and turnip)	10	0.2035
2	2018-03-05	38	5	Mixture of five (oats, wheat, crimson clover, radish, and turnip)	20	0.278
2	2018-03-05	38	5	Mixture of five (oats, wheat, crimson clover, radish, and turnip)	30	0.3125
2	2018-03-05	38	5	Mixture of five (oats, wheat, crimson clover, radish, and turnip)	40	0.3045
2	2018-03-05	38	5	Mixture of five (oats, wheat, crimson clover, radish, and turnip)	60	0.48675
2	2018-03-05	38	1	Mixture of two (crimson clover and rye)	10	0.04425
2	2018-03-05	38	1	Mixture of two (crimson clover and rye)	20	0.1155
2	2018-03-05	38	1	Mixture of two (crimson clover and rye)	30	0.19025
2	2018-03-05	38	1	Mixture of two (crimson clover and rye)	40	0.269
2	2018-03-05	38	1	Mixture of two (crimson clover and rye)	60	0.28175
2	2018-03-05	38	2	Mixture of two (crimson clover and rye)	10	0.14875
2	2018-03-05	38	2	Mixture of two (crimson clover and rye)	20	0.24975
2	2018-03-05	38	2	Mixture of two (crimson clover and rye)	30	0.3135
2	2018-03-05	38	2	Mixture of two (crimson clover and rye)	40	0.348
2	2018-03-05	38	2	Mixture of two (crimson clover and rye)	60	0.38225
2	2018-03-05	38	3	Mixture of two (crimson clover and rye)	10	0.172
2	2018-03-05	38	3	Mixture of two (crimson clover and rye)	20	0.12175
2	2018-03-05	38	3	Mixture of two (crimson clover and rye)	30	0.23
2	2018-03-05	38	3	Mixture of two (crimson clover and rye)	40	0.3235
2	2018-03-05	38	3	Mixture of two (crimson clover and rye)	60	0.40175
2	2018-03-05	38	4	Mixture of two (crimson clover and rye)	10	0.177
2	2018-03-05	38	4	Mixture of two (crimson clover and rye)	20	0.23575
2	2018-03-05	38	4	Mixture of two (crimson clover and rye)	30	0.3075
2	2018-03-05	38	4	Mixture of two (crimson clover and rye)	40	0.3245
2	2018-03-05	38	4	Mixture of two (crimson clover and rye)	60	0.40425
2	2018-03-05	38	5	Mixture of two (crimson clover and rye)	10	0.20625
2	2018-03-05	38	5	Mixture of two (crimson clover and rye)	20	0.29475
2	2018-03-05	38	5	Mixture of two (crimson clover and rye)	30	0.2665
2	2018-03-05	38	5	Mixture of two (crimson clover and rye)	40	0.27975
2	2018-03-05	38	5	Mixture of two (crimson clover and rye)	60	0.43775
2	2018-03-05	38	1	Mixture of two (oat and radish)	10	0.075
2	2018-03-05	38	1	Mixture of two (oat and radish)	20	0.17275
2	2018-03-05	38	1	Mixture of two (oat and radish)	30	0.14825
2	2018-03-05	38	1	Mixture of two (oat and radish)	40	0.22
2	2018-03-05	38	1	Mixture of two (oat and radish)	60	0.364
2	2018-03-05	38	2	Mixture of two (oat and radish)	10	0.23125
2	2018-03-05	38	2	Mixture of two (oat and radish)	20	0.25875
2	2018-03-05	38	2	Mixture of two (oat and radish)	30	0.3105
2	2018-03-05	38	2	Mixture of two (oat and radish)	40	0.3405
2	2018-03-05	38	2	Mixture of two (oat and radish)	60	0.38875
2	2018-03-05	38	3	Mixture of two (oat and radish)	10	0.0255
2	2018-03-05	38	3	Mixture of two (oat and radish)	20	0.138
2	2018-03-05	38	3	Mixture of two (oat and radish)	30	0.31325
2	2018-03-05	38	3	Mixture of two (oat and radish)	40	0.37775
2	2018-03-05	38	3	Mixture of two (oat and radish)	60	0.37925
2	2018-03-05	38	4	Mixture of two (oat and radish)	10	0.05875
2	2018-03-05	38	4	Mixture of two (oat and radish)	20	0.1725
2	2018-03-05	38	4	Mixture of two (oat and radish)	30	0.319
2	2018-03-05	38	4	Mixture of two (oat and radish)	40	0.37225
2	2018-03-05	38	4	Mixture of two (oat and radish)	60	0.3555
2	2018-03-05	38	5	Mixture of two (oat and radish)	10	0.1255
2	2018-03-05	38	5	Mixture of two (oat and radish)	20	0.31775
2	2018-03-05	38	5	Mixture of two (oat and radish)	30	0.345
2	2018-03-05	38	5	Mixture of two (oat and radish)	40	0.3665
2	2018-03-05	38	5	Mixture of two (oat and radish)	60	0.43825
2	2018-03-05	38	1	Mixture of two (crimson clover and turnip)	10	0.0235
2	2018-03-05	38	1	Mixture of two (crimson clover and turnip)	20	0.07075
2	2018-03-05	38	1	Mixture of two (crimson clover and turnip)	30	0.174
2	2018-03-05	38	1	Mixture of two (crimson clover and turnip)	40	0.3105
2	2018-03-05	38	1	Mixture of two (crimson clover and turnip)	60	0.34025
2	2018-03-05	38	2	Mixture of two (crimson clover and turnip)	10	0.13325
2	2018-03-05	38	2	Mixture of two (crimson clover and turnip)	20	0.252
2	2018-03-05	38	2	Mixture of two (crimson clover and turnip)	30	0.2935
2	2018-03-05	38	2	Mixture of two (crimson clover and turnip)	40	0.327
2	2018-03-05	38	2	Mixture of two (crimson clover and turnip)	60	0.405
2	2018-03-05	38	3	Mixture of two (crimson clover and turnip)	10	0.183
2	2018-03-05	38	3	Mixture of two (crimson clover and turnip)	20	0.29775
2	2018-03-05	38	3	Mixture of two (crimson clover and turnip)	30	0.348
2	2018-03-05	38	3	Mixture of two (crimson clover and turnip)	40	0.36175
2	2018-03-05	38	3	Mixture of two (crimson clover and turnip)	60	0.37125
2	2018-03-05	38	4	Mixture of two (crimson clover and turnip)	10	.
2	2018-03-05	38	4	Mixture of two (crimson clover and turnip)	20	0.261
2	2018-03-05	38	4	Mixture of two (crimson clover and turnip)	30	0.264
2	2018-03-05	38	4	Mixture of two (crimson clover and turnip)	40	0.32475
2	2018-03-05	38	4	Mixture of two (crimson clover and turnip)	60	0.42975
2	2018-03-05	38	5	Mixture of two (crimson clover and turnip)	10	0.21275
2	2018-03-05	38	5	Mixture of two (crimson clover and turnip)	20	0.309
2	2018-03-05	38	5	Mixture of two (crimson clover and turnip)	30	0.30175
2	2018-03-05	38	5	Mixture of two (crimson clover and turnip)	40	0.345
2	2018-03-05	38	5	Mixture of two (crimson clover and turnip)	60	0.4125
2	2018-03-05	38	1	Single species (crimson clover)	10	0.2105
2	2018-03-05	38	1	Single species (crimson clover)	20	0.26425
2	2018-03-05	38	1	Single species (crimson clover)	30	0.292
2	2018-03-05	38	1	Single species (crimson clover)	40	0.356
2	2018-03-05	38	1	Single species (crimson clover)	60	0.3625
2	2018-03-05	38	2	Single species (crimson clover)	10	0.16725
2	2018-03-05	38	2	Single species (crimson clover)	20	0.2475
2	2018-03-05	38	2	Single species (crimson clover)	30	0.293
2	2018-03-05	38	2	Single species (crimson clover)	40	0.33825
2	2018-03-05	38	2	Single species (crimson clover)	60	0.40675
2	2018-03-05	38	3	Single species (crimson clover)	10	0.14775
2	2018-03-05	38	3	Single species (crimson clover)	20	0.2725
2	2018-03-05	38	3	Single species (crimson clover)	30	0.29875
2	2018-03-05	38	3	Single species (crimson clover)	40	0.342
2	2018-03-05	38	3	Single species (crimson clover)	60	0.4125
2	2018-03-05	38	4	Single species (crimson clover)	10	0.10125
2	2018-03-05	38	4	Single species (crimson clover)	20	0.20575
2	2018-03-05	38	4	Single species (crimson clover)	30	0.3435
2	2018-03-05	38	4	Single species (crimson clover)	40	0.38675
2	2018-03-05	38	4	Single species (crimson clover)	60	0.39825
2	2018-03-05	38	5	Single species (crimson clover)	10	0.197
2	2018-03-05	38	5	Single species (crimson clover)	20	0.24375
2	2018-03-05	38	5	Single species (crimson clover)	30	0.35825
2	2018-03-05	38	5	Single species (crimson clover)	40	0.405
2	2018-03-05	38	5	Single species (crimson clover)	60	0.44675
2	2018-03-05	38	1	Single species (rye)	10	0.183
2	2018-03-05	38	1	Single species (rye)	20	0.2655
2	2018-03-05	38	1	Single species (rye)	30	0.2955
2	2018-03-05	38	1	Single species (rye)	40	0.3195
2	2018-03-05	38	1	Single species (rye)	60	0.3855
2	2018-03-05	38	2	Single species (rye)	10	0.1835
2	2018-03-05	38	2	Single species (rye)	20	0.2675
2	2018-03-05	38	2	Single species (rye)	30	0.28375
2	2018-03-05	38	2	Single species (rye)	40	0.30875
2	2018-03-05	38	2	Single species (rye)	60	0.3855
2	2018-03-05	38	3	Single species (rye)	10	0.12075
2	2018-03-05	38	3	Single species (rye)	20	0.2265
2	2018-03-05	38	3	Single species (rye)	30	0.32225
2	2018-03-05	38	3	Single species (rye)	40	0.3385
2	2018-03-05	38	3	Single species (rye)	60	0.32225
2	2018-03-05	38	4	Single species (rye)	10	0.17525
2	2018-03-05	38	4	Single species (rye)	20	0.25625
2	2018-03-05	38	4	Single species (rye)	30	0.309
2	2018-03-05	38	4	Single species (rye)	40	0.32575
2	2018-03-05	38	4	Single species (rye)	60	0.3775
2	2018-03-05	38	5	Single species (rye)	10	0.167
2	2018-03-05	38	5	Single species (rye)	20	0.2945
2	2018-03-05	38	5	Single species (rye)	30	0.33075
2	2018-03-05	38	5	Single species (rye)	40	0.3745
2	2018-03-05	38	5	Single species (rye)	60	0.4175
2	2018-03-05	38	1	Control 1 - Fallow with herbicide control	10	0.1075
2	2018-03-05	38	1	Control 1 - Fallow with herbicide control	20	0.24775
2	2018-03-05	38	1	Control 1 - Fallow with herbicide control	30	0.2485
2	2018-03-05	38	1	Control 1 - Fallow with herbicide control	40	0.261
2	2018-03-05	38	1	Control 1 - Fallow with herbicide control	60	0.391
2	2018-03-05	38	2	Control 1 - Fallow with herbicide control	10	0.16225
2	2018-03-05	38	2	Control 1 - Fallow with herbicide control	20	0.1825
2	2018-03-05	38	2	Control 1 - Fallow with herbicide control	30	0.25275
2	2018-03-05	38	2	Control 1 - Fallow with herbicide control	40	0.31275
2	2018-03-05	38	2	Control 1 - Fallow with herbicide control	60	0.34925
2	2018-03-05	38	3	Control 1 - Fallow with herbicide control	10	0.1645
2	2018-03-05	38	3	Control 1 - Fallow with herbicide control	20	0.2675
2	2018-03-05	38	3	Control 1 - Fallow with herbicide control	30	0.3215
2	2018-03-05	38	3	Control 1 - Fallow with herbicide control	40	0.3095
2	2018-03-05	38	3	Control 1 - Fallow with herbicide control	60	0.36725
2	2018-03-05	38	4	Control 1 - Fallow with herbicide control	10	0.1405
2	2018-03-05	38	4	Control 1 - Fallow with herbicide control	20	0.2715
2	2018-03-05	38	4	Control 1 - Fallow with herbicide control	30	0.36075
2	2018-03-05	38	4	Control 1 - Fallow with herbicide control	40	0.37275
2	2018-03-05	38	4	Control 1 - Fallow with herbicide control	60	0.41475
2	2018-03-05	38	5	Control 1 - Fallow with herbicide control	10	0.12825
2	2018-03-05	38	5	Control 1 - Fallow with herbicide control	20	0.14825
2	2018-03-05	38	5	Control 1 - Fallow with herbicide control	30	0.34075
2	2018-03-05	38	5	Control 1 - Fallow with herbicide control	40	0.32125
2	2018-03-05	38	5	Control 1 - Fallow with herbicide control	60	0.33075
2	2018-03-05	38	1	Control 2 - Fallow without herbicide control	10	0.125
2	2018-03-05	38	1	Control 2 - Fallow without herbicide control	20	0.21775
2	2018-03-05	38	1	Control 2 - Fallow without herbicide control	30	0.18425
2	2018-03-05	38	1	Control 2 - Fallow without herbicide control	40	0.23625
2	2018-03-05	38	1	Control 2 - Fallow without herbicide control	60	0.33125
2	2018-03-05	38	2	Control 2 - Fallow without herbicide control	10	0.12275
2	2018-03-05	38	2	Control 2 - Fallow without herbicide control	20	0.28175
2	2018-03-05	38	2	Control 2 - Fallow without herbicide control	30	0.33975
2	2018-03-05	38	2	Control 2 - Fallow without herbicide control	40	0.35175
2	2018-03-05	38	2	Control 2 - Fallow without herbicide control	60	0.36575
2	2018-03-05	38	3	Control 2 - Fallow without herbicide control	10	0.1565
2	2018-03-05	38	3	Control 2 - Fallow without herbicide control	20	0.24375
2	2018-03-05	38	3	Control 2 - Fallow without herbicide control	30	0.291
2	2018-03-05	38	3	Control 2 - Fallow without herbicide control	40	0.332
2	2018-03-05	38	3	Control 2 - Fallow without herbicide control	60	0.37075
2	2018-03-05	38	4	Control 2 - Fallow without herbicide control	10	0.11325
2	2018-03-05	38	4	Control 2 - Fallow without herbicide control	20	0.22825
2	2018-03-05	38	4	Control 2 - Fallow without herbicide control	30	0.2525
2	2018-03-05	38	4	Control 2 - Fallow without herbicide control	40	0.32025
2	2018-03-05	38	4	Control 2 - Fallow without herbicide control	60	0.4245
2	2018-03-05	38	5	Control 2 - Fallow without herbicide control	10	0.1755
2	2018-03-05	38	5	Control 2 - Fallow without herbicide control	20	0.2715
2	2018-03-05	38	5	Control 2 - Fallow without herbicide control	30	0.2785
2	2018-03-05	38	5	Control 2 - Fallow without herbicide control	40	0.307
2	2018-03-05	38	5	Control 2 - Fallow without herbicide control	60	0.3305
2	2018-03-28	61	1	Mixture of five (Austrian winter peas, rye, wheat, crimson clover, hairy vetch, and oats)	10	0.11975
2	2018-03-28	61	1	Mixture of five (Austrian winter peas, rye, wheat, crimson clover, hairy vetch, and oats)	20	0.149
2	2018-03-28	61	1	Mixture of five (Austrian winter peas, rye, wheat, crimson clover, hairy vetch, and oats)	30	0.243
2	2018-03-28	61	1	Mixture of five (Austrian winter peas, rye, wheat, crimson clover, hairy vetch, and oats)	40	0.29225
2	2018-03-28	61	1	Mixture of five (Austrian winter peas, rye, wheat, crimson clover, hairy vetch, and oats)	60	0.37725
2	2018-03-28	61	2	Mixture of five (Austrian winter peas, rye, wheat, crimson clover, hairy vetch, and oats)	10	0.1625
2	2018-03-28	61	2	Mixture of five (Austrian winter peas, rye, wheat, crimson clover, hairy vetch, and oats)	20	0.22225
2	2018-03-28	61	2	Mixture of five (Austrian winter peas, rye, wheat, crimson clover, hairy vetch, and oats)	30	0.275
2	2018-03-28	61	2	Mixture of five (Austrian winter peas, rye, wheat, crimson clover, hairy vetch, and oats)	40	0.26975
2	2018-03-28	61	2	Mixture of five (Austrian winter peas, rye, wheat, crimson clover, hairy vetch, and oats)	60	0.34575
2	2018-03-28	61	3	Mixture of five (Austrian winter peas, rye, wheat, crimson clover, hairy vetch, and oats)	10	0.1155
2	2018-03-28	61	3	Mixture of five (Austrian winter peas, rye, wheat, crimson clover, hairy vetch, and oats)	20	0.27775
2	2018-03-28	61	3	Mixture of five (Austrian winter peas, rye, wheat, crimson clover, hairy vetch, and oats)	30	0.3185
2	2018-03-28	61	3	Mixture of five (Austrian winter peas, rye, wheat, crimson clover, hairy vetch, and oats)	40	0.33525
2	2018-03-28	61	3	Mixture of five (Austrian winter peas, rye, wheat, crimson clover, hairy vetch, and oats)	60	0.396
2	2018-03-28	61	4	Mixture of five (Austrian winter peas, rye, wheat, crimson clover, hairy vetch, and oats)	10	0.1595
2	2018-03-28	61	4	Mixture of five (Austrian winter peas, rye, wheat, crimson clover, hairy vetch, and oats)	20	0.2325
2	2018-03-28	61	4	Mixture of five (Austrian winter peas, rye, wheat, crimson clover, hairy vetch, and oats)	30	0.289
2	2018-03-28	61	4	Mixture of five (Austrian winter peas, rye, wheat, crimson clover, hairy vetch, and oats)	40	0.35875
2	2018-03-28	61	4	Mixture of five (Austrian winter peas, rye, wheat, crimson clover, hairy vetch, and oats)	60	0.33925
2	2018-03-28	61	5	Mixture of five (Austrian winter peas, rye, wheat, crimson clover, hairy vetch, and oats)	10	0.1675
2	2018-03-28	61	5	Mixture of five (Austrian winter peas, rye, wheat, crimson clover, hairy vetch, and oats)	20	0.2595
2	2018-03-28	61	5	Mixture of five (Austrian winter peas, rye, wheat, crimson clover, hairy vetch, and oats)	30	0.337
2	2018-03-28	61	5	Mixture of five (Austrian winter peas, rye, wheat, crimson clover, hairy vetch, and oats)	40	0.39475
2	2018-03-28	61	5	Mixture of five (Austrian winter peas, rye, wheat, crimson clover, hairy vetch, and oats)	60	0.43075
2	2018-03-28	61	1	Mixture of five (oats, wheat, crimson clover, radish, and turnip)	10	0.19275
2	2018-03-28	61	1	Mixture of five (oats, wheat, crimson clover, radish, and turnip)	20	0.1655
2	2018-03-28	61	1	Mixture of five (oats, wheat, crimson clover, radish, and turnip)	30	0.27225
2	2018-03-28	61	1	Mixture of five (oats, wheat, crimson clover, radish, and turnip)	40	0.335
2	2018-03-28	61	1	Mixture of five (oats, wheat, crimson clover, radish, and turnip)	60	0.3855
2	2018-03-28	61	2	Mixture of five (oats, wheat, crimson clover, radish, and turnip)	10	0.22275
2	2018-03-28	61	2	Mixture of five (oats, wheat, crimson clover, radish, and turnip)	20	0.24225
2	2018-03-28	61	2	Mixture of five (oats, wheat, crimson clover, radish, and turnip)	30	0.3
2	2018-03-28	61	2	Mixture of five (oats, wheat, crimson clover, radish, and turnip)	40	0.33975
2	2018-03-28	61	2	Mixture of five (oats, wheat, crimson clover, radish, and turnip)	60	0.382
2	2018-03-28	61	3	Mixture of five (oats, wheat, crimson clover, radish, and turnip)	10	0.06925
2	2018-03-28	61	3	Mixture of five (oats, wheat, crimson clover, radish, and turnip)	20	0.19525
2	2018-03-28	61	3	Mixture of five (oats, wheat, crimson clover, radish, and turnip)	30	0.29925
2	2018-03-28	61	3	Mixture of five (oats, wheat, crimson clover, radish, and turnip)	40	0.334
2	2018-03-28	61	3	Mixture of five (oats, wheat, crimson clover, radish, and turnip)	60	0.41125
2	2018-03-28	61	4	Mixture of five (oats, wheat, crimson clover, radish, and turnip)	10	0.0655
2	2018-03-28	61	4	Mixture of five (oats, wheat, crimson clover, radish, and turnip)	20	0.188
2	2018-03-28	61	4	Mixture of five (oats, wheat, crimson clover, radish, and turnip)	30	0.35825
2	2018-03-28	61	4	Mixture of five (oats, wheat, crimson clover, radish, and turnip)	40	0.37725
2	2018-03-28	61	4	Mixture of five (oats, wheat, crimson clover, radish, and turnip)	60	0.41825
2	2018-03-28	61	5	Mixture of five (oats, wheat, crimson clover, radish, and turnip)	10	0.19975
2	2018-03-28	61	5	Mixture of five (oats, wheat, crimson clover, radish, and turnip)	20	0.2725
2	2018-03-28	61	5	Mixture of five (oats, wheat, crimson clover, radish, and turnip)	30	0.306
2	2018-03-28	61	5	Mixture of five (oats, wheat, crimson clover, radish, and turnip)	40	0.28775
2	2018-03-28	61	5	Mixture of five (oats, wheat, crimson clover, radish, and turnip)	60	0.194
2	2018-03-28	61	1	Mixture of two (crimson clover and rye)	10	0.04325
2	2018-03-28	61	1	Mixture of two (crimson clover and rye)	20	0.11775
2	2018-03-28	61	1	Mixture of two (crimson clover and rye)	30	0.18775
[truncated: 1,072 more rows]
